# Supplementary material for: Burnout, associated comorbidities and coping strategies in French community pharmacies—BOP study: A nationwide cross-sectional study
Source: PLoS One. 2017 Aug 11;12(8):e0182956. doi: 10.1371/journal.pone.0182956 (PMC5553933; doi:10.1371/journal.pone.0182956)
Supplement: S1 Table — (XLSX) [file pone.0182956.s001.xlsx]

## Sheet: Data PLOS ONE
ID	MBI_1	MBI_2	MBI_3	MBI_4	MBI_5	MBI_6	MBI_7	MBI_8	MBI_9	MBI_10	MBI_11	MBI_12	MBI_13	MBI_14	MBI_15	MBI_16	MBI_17	MBI_18	MBI_19	MBI_20	MBI_21	MBI_22	HADS_A_1	HADS_D_1	HADS_A_2	HADS_D_2	HADS_A_3	HADS_D_3	HADS_A_4	HADS_D_4	HADS_A_5	HADS_D_5	HADS_A_6	HADS_D_6	HADS_A_7	HADS_D_7	MEDICAL_CONSULTATION	MEDICATION_USE	HOMEOPATHY	PHYTOTHERAPY	ANXIOLYTICS	HYPNOTICS	PRESCRIPTION_AUTOMEDICATION	PSYCHOACTIV_DRUGS	NUTRITION	PSYCHOTHERAPY	RELAXATION	SPORT	MUSIC
1	4	5	5	6	5	3	6	4	5	1	3	1	2	5	1	1		6	5	5	5	1	2	1	3	1	3	2	2	1	2	1	2	1	2	1	1	1	0	0	1	0	2	0	0	1	1	0	0
2	6	6	6	5	1	5	6	5	6	0	1	0	0	3	0	0	6	3	6	6	6	1	3	1	3	0	3	2	2	3	3	1	3	1	3	0	0	1	1	0	0	0	1	0	0	0	0	0	1
3	6	6	5	6	0	0	6	5	6	0	0	6	0	6	0	0	6	6	6	6	6	0	2	0	2	0	1	0	1	0	1	0	3	0	0	0	0	1	0	0	1	0	2	0	0	0	0	1	1
4	1	1	1	5	3	1	5	1	3	1	1	5	3	0	0	2	6	6	5	1	2	3	2	1	0	1	2	1	2	1	0	0	0	0	0	0	0	0	0	0	0	0		0	0	0	0	0	1
5	3	5	4	3	0	1	6	1	6	1	1	5	1	4	0	1	6	6	6	1	5	0	2	1	1	0	2		1	1	1	1	3	1	1	0	0	0	0	0	0	0		0	0		0	0	1
6	3	3	2	3	3	2	6	2	6	0	3	6	3	1	1	0		6	6	2	6	1	1	1	0	1	2	2	1	1	1	0	2	1	1	0	0	0	0	0	0	0		0	0	0	0	1	1
7	4	5	3	3	3	0	5	1	5	0	1	3	1	5	2	1	5	5	5	3	5	1	2	2	0	1	2	2	3	2	0	0	2	1	0	1	0	0	0	0	0	0		0	0	0	0	0	0
8	5	3	6	0	0	1	6	3	6	6	0	3	6	6	0	3	6	3	1	3	6	6	2	2	3	2	3	2	3	3	2	1	0	2	3	3	0	0	0	0	0	0		0	0	0	0	0	1
9	6	6	6	5	5	1	6	6	6	0	6	0	6	6	0	0	6	6	6	6	6	5	2	0	3	0	3	1	1	3	3	2	1	1	3	2	0	0	0	0	0	0		0	0	0	0	1	0
10	4	6	5	3	5	1	4	6	3	5	6	1	3	5	5	1	2	4	3	4	0	4	3	2	2	1	2	1	1	2	1	1	0	2	1	3	0	0	0	0	0	0		1	0	0	0	1	1
11	1	0	1	6	1	0	6	0	4	0	1	3	1	0	0	0	1	6	5	0	5	0	1	1	0	1	2	1	1	1	1	1	0	1	1	2	0	0	0	0	0	0		0	0	0	0	1	0
12	3	3	3	5	3	0	4	5	2	5	5	5	1	6	0	0	6	0	6	3	5	0	3	0	1	0	2	0	2	1	2	0	2	0	1	0	0	0	0	0	0	0		0	1	0	1	1	1
13	5	5	0	6	0	6	6	1	6	0	0	5	6	6	0	0	6	6	6	6	6	0	3	0	0	0	0	1	3	0	0	0	3	3	0	1	0	1	0	0	0	0	1	0	1	0	0	0	0
14	3	3	1	6	1	0	6	1	6	0	1	6	1	1	0	0	6	6	6	1	6	0	1	0	1	0	1	0	1	1	1	0	1	0	1	0	0	0	0	0	0	0		0	1	0	0	0	1
15	0	0	1	6	3	1	6	0	6	0	0	5	0	0	1	0	6	6	6	0	6	0	1	0	0	0	1	0	0	1	0	0	0	0	0	0	0	0	0	0	0	0		0	0	0	0	0	1
16	1	2	0	6	0	0	6	1	6	0	0	5	1	0	0	0	6	6	6	1	6	0	1	0	0	0	2	0	1	1	1	0	3	0	0	0	0	0	0	0	0	0		0	1	0	0	0	1
17	0	0	0	6	0	0	6	0	6	0	0	5	0	0	0	0	6	6	6	0	5	0	1	0	0	0	2	1	1	1	0	0	0	0	0	0	0	0	0	0	0	0		0	1	0	0	0	1
18	3	4	5	5	3	2	6	3	5	1	2	2	1	5	3	1	5	5	3	3	2	1	2	1	2	0	3	1	1	1	2	0	1	1	1	0	0	0	0	0	0	0		0	0	0	0	1	1
19	5	4	3	6	3	1	6	1	6	0	3	3	6	5	0	3	6	6	6	3	4	0	3	1	1	1	3	1	3	2	1	1	3	1	2	1	1	1	0	0	1	0	2	0	0	0	1	1	1
20	1	0	0	6	0	0	6	1	1	0	0	4	5	4	0	0	6	6	4	1	1	1	2	1	3	1	2	1	2	1	0	0	2	1	0	1	0	0	0	0	0	0		0	0	0	0	1	1
21	5	5	5	6	2	3	6	3	6	0	0	4	3	3	0	0	6	6	5	3	5	0	3	1	0	1	3	1	2	1	1	0	2	0	0	0	0	0	0	0	0	0		0	1	1	0	1	1
22	1	4	0	1	0	0	0	0	2	0	0	6	0	0	0	0	0	0	5	0	6	0	1	0	0	0	1	0	0	1	0	0	1	0	1	0	0	0	0	0	0	0		0	0	0	0	1	0
23	3	3	3	6	1	4	6	3	6	0	0	5	1	1	0	0	6	6	6	1	6	0	1	1	0	1	2	1	1	1	1	0	0	0	2	0	0	0	0	0	0	0		0	1	0	0	1	1
24	1	0	4	5	0	1	5	0	5	0	5	5	0	0	0	0	6	5	5	0	0	1	1	0	0	0	0	1	1	1	1	0	1	0	0	0	0	0	0	0	0	0		0	0	0	0	0	1
25	2	4	4	4	4	4	4	4	4	4	4	4	4	4	4	5	4	5	5	5		4	2	0	3	0	3	3	3	3	2	2	2	1	2	1	0	0	0	0	0	0		0	1	0	0	1	0
26	0	0	5	6	0	0	6	0	6	0	0	5	3	0	0	3	6	6	4	0	6	0	1	0	0	0	0	0	0	0	0	0	0	0	0	0	0	0	0	0	0	0		0	0	0	0	1	1
27	2	3	3	5	0	1	6	1	6	0	1	5	1	1	0	1	3	1	2	1	3	0	1	0	0	1	1	1	1	1	0	0	1	0	0	0	0	0	0	0	0	0		0	1	0	1	1	1
28	6	5	5	6	0	5	6	4	5	0	5	1	1	5	0	0	5	5	6	4	6	3	3	1	2	2	3	2	2	1	3	1	2	2	2	3	0	1	0	0	1	0	1	0		0		0	0
29	0	0	0	0	0	1	6	1	6	1	2	6	1	0	1	1	6	5	5	0	6	0	1	0	0	0	1	1	1	0	0	1	0	0	0	0	0	0	0	0	0	0		0		0	0	1	1
30	1	1	2	3	4	2	3	1	1	2	1	1	1	1	1	1	2	2	2	2	2	0	2	3	0	2	2	2	2	1	1	1	2	2	1	1	0	0	0	0	0	0		0	0	0	0	1	1
31	6	6	6	5	4	5	5	5	6	5	5	5	6	6	6	5	5	5	5	6	5	5	3	3	3	2	3	2	2	2	2	1	2	2	2	2	1	1	0	0	1	1	2	1	1	1	1	0	1
32	5	6	5	6	2	3	6	1	3	0	6	6	6	6	0	3	6	5	4	6	0	2	3	3	2	1	3	1	3	0	1	0	3	1	0	3	0	0	0	0	0	0		0	1	0	0		1
33	5	4	5	4	4	4	5	4	5	4	5	4	4	6	0		6	5	5	4	5	1	2	2	2	1	3	1	3	1	2	1	3	1	2	1	0	0	0	0	0	0		0	0	0	0	1	0
34	0	0	0	0	0	0	3	0	3	3	6	6	0	0	0	0	6	6	6	0	6	0	0	0	0	0	1	0	0	0	0	0	0	0	0	0	0	0	0	0	0	0		0	0	0	0	1	1
35	5	5	5	6	6	3	6	5	5	3	0	5	5	5	2	4	6	5	5	5	3	5	2	1	1	1	3	1	2	2	1	1	1	2	2	2	1	1	0	0	1	0	2	0	0	0	0	0	1
36	5	5	5	6	6	3	6	5	5	3	0	5	5	5	2	4	6	5	5	5	3	5	2	1	1	1	3	1	2	2	1	1	1	2	2	2	1	1	0	0	1	0	2	0	0	0	0	0	1
37	4	3	3	4	4	3	6	2	6	3	4	6	5	5	4	1	5	6	6	2	5	3	2	1	1	1	2	1	2	0	1	0	2	1	0	1	0	0	0	0	0	0		0	0	0	1	1	0
38	0	3	1	3	0	1	3	0	4	0	0	6	1	1	1	1	5	6	5	0	3	0	1	0	0	0	0	0	1	0	1	0	3	0	1	0	0	0	0	0	0	0		0	0	0	0	1	0
39	1	1	0	6	0	0	6	0	5	0	0	6	0	0	0	0	5	5	6	0	5	0	1	0	0	0	0	0	0	0	0	0	0	0	0	0	0	0	0	0	0	0		0	0	0	0	0	1
40	1	2	0	6	1	1	6	1	6	0	1	3	3	0	0	0	4	4	4	2	2	1	2	1	0	1	2	2	2	1	2	0	2	1	1	2	0	1	0	0	0	1	1	0	0	0	0	1	0
41	0	0	0	6	0	0	6	1	6	6	0	6	2	0	0	0	6	0	6	1	6	0	1	0	0	1	0	1	0	1	0	0	3	0	0	2	0	0	0	0	0	0		0	0	0	0	0	0
42	1	3	1	6	2	1	6	1	5	0	1	4	2	3	1	1	5	5	5	1	5	1	1	0	2	0	3	1	2	1	1	1	1	0	1	1	0	0	0	0	0	0		0	0	0	0		0
43	3	3	3	6	1	1	6	3	5	0	0	3	0	6	1	0	6	6	6	3	6	0	1	0	0	0	1	0	1	3	0	1	0	0	0	1	0	0	0	0	0	0		0	0	0	0	0	1
44	1	3	1	6	0	1	6	0	6	3	3	6	0	1	0	3	6	6	6	0	5	1	2	0	3	0	3	1	2	1	1	0	1	1	0	0	0	0	0	0	0	0		0	0	0	0	0	0
45	3	2	3	4	0	4	5	1	3	0	1	3	2	1	0	0	6	4	2	1	4	0	1	0	0	0	2	1	1	1	0	0	2	0	1	0	0	0	0	0	0	0		0	1	0	1	1	1
46	1	1	2	5	0	3	5	1	1	1	1	3	3	3	1	1	6	6	6	3	6	0	1	0	0	1	2	0	1	1	0	0	2	0	0	0	0	0	0	0	0	0		0	0	0	0	1	1
47	0	2	2	0	0	0	6	0	0	2	0	5	6	1	2	2	6	5	6	2	6	0	0	1	0	0	2	1	0	0	1	1	3	0	0	0	0	0	0	0	0	0		0	0	0	0	1	1
48	0	0	0	5	3	1	4	0	3	0	1	5	0		4	2	4	3	4	0	4	0	0	0	0	0	1	0	1	0	0	0	3	0	0	1	0	0	0	0	0	0		0	0		0	1	1
49	1	1	3	5	3	2	4	1	2	5	1	3	0	1	1	1	3	1	3	0	2	0	1	0	0	0	1	1	1	0	1	0	3	0	1	0	0	0	0	0	0	0		0	0	0	0	0	0
50	3	4	1	5	1	3	6	1	5	1	0	6	1	3	1	4	6	5	5	1	1	0	1	0	1	1	1	1	2	1	1	1	3	1	1	1	0	0	0	0	0	0		0	0	0	0	0	1
51	0	5	1	6	0	0	6	0	6	0	0	5	1	3	0	0	6	6	6	1	6	0	1	0	2	0	3	0	0	2	1	2	0	0	2	0	0	0	0	0	0	0		0	0	0	0	0	0
52	1	1	1	1	3	1	6	1	5	1	1		1	1	3	0	6	6	5	0	4	0	1	1	0	0	1	0	1	1	0	0	1		0	0	0	0	0	0	0	0		0	0	0	0	1	1
53	6	6	6	6	0	5	6	3	5	5	5	0	0	6	5	0	6	5	5	6	3	0	3	1	3	2	3	2	2	1	1	0	0	2	2	2	1	1	1	0	1	0	2	0	1	0	0	1	0
54	0	1	1	6	1	1	5	0	6	0	0	4	0	0	1	0	6	6	2	0	3	0	1	0	0	2	2	1	1	1	1	0	0	1	1	3	0	0	0	0	0	0		0	1	0	0	1	1
55	3	5	5	4	1	1	6	3	4	1	3	4	2	3	1	1	5	5	4	2	3	3	2	1	1	0	2	1	1	2	1	0	2	1	1	0	0	0	0	0	0	0		0	0	0	0	1	1
56	1	1	0	6	0	0	6	0	6	1	1	6	1	3	0	0	6	5	6	0	6	2	1	0	0	0	2	1	1	0	0	0	1	0	0	0	0	0	0	0	0	0		0	0	0	0	0	0
57	6	6	6	5	6	6	3	5	2	6	6	3	6	6	6	6	5	4	2	6	5	5	3	2	3	1	3	1	2	1	3	1	3	2	2	1	0	1	0	0	1	0	1	1	0	0	0	1	0
58	3	5	6	6	3	3	6	3	5	0	0	5	5	5	0	5	5	6		5	5	1	3	3	2	0	3	1	2	1	1	3	3	2	3	1	0	1	0	0	1	1	1	0	0	0	0	0	0
59	5	5	5	6	5	5	6	3	2	5	6		3	0	5	0	6	3	1	3	6	3	2	1	2	1	2	1	2	1	1	0	0	0	0	0	0	0	0	0	0	0		1	1	0	1	1	1
60	0	0	0	1	0	0	6	0	5	1	1	5	0	0	1	0	5	5	3	0	6	1	1	0	0	0	0	1	1	1	0	0	1	1	1	0	0	0	0	0	0	0		0	0	0	0	0	1
61	1	5	5	5	3	0	6	4	6	0	0	5	5	5	0	1	6	6	5	4	6	0	1	0	1	1	2	1	2	2	1	1	2	1	1	2	0	0	0	0	0	0		1	0	0	0	0	1
62	4	3	3	6	0	0	6	4	5	0	0	5	5	5	0	1	6	6	6	4	5	5	3	0	1	2	3	1	3	1	2	0	3	2	1	0	0	0	0	0	0	0		0	0	0	0	1	1
63	1	1	3	6	3	3	5	1	5	0	1	5	1	1	1	3	5	6	5	1	5	1	1	0	0	0	1	1		1	0	0	1	0	0	0	0	0	0	0	0	0		0	1	0	1	0	1
64	5	5	6	5	5	5	5	6	4	1	0	1	5	6	3	5	6	3	1	5	2	5	3	1	0	0	3	1	1	1	3	0	1	0	2	0	0	1	0	0	1	1	2	0	0	0	0	0	1
65	3	5	2	6	0	1	6	3	6	1	1	5	1	6	0	1	6	6	6	3	6	3	1	1	2	1	2	2	2	0	2	1	3	2	1	1	0	1	1	1	0	0	1	0	0	1	1	0	1
66	5	6	5	6	5						5	3	5	6	5	3	6	6	5	5	3	1	2	1	2	1	2	1	1	1	2	1	2	2	2	0	0	0	0	0	0	0		1	0	0	0	0	0
67	6	6	5	6	5	5	5	5	5	5	5	0	5	6	5	2	2	3	5	6	4	1	2	2	2	1	3	2	2	2	3	2	1	2	1	3	1	1	0	0	1	1	2	0	0	1	0	0	0
68	3	1	3	6	0	1	6	1	5	0	0	5	3	3	0	1	6	6	6	1	5	0	2	0	0	1	2	1	1	1	1	0	0	0	1	0	0	0	0	0	0	0		0	0	0	0	1	1
69	5	5	5	6	0	5	6	5	6	2	1	0	6	5	2	5	6	6	5	3	6	3	3	1	2	1	3	1	2	0	3	0	3	1	1	0	0	1	0	0	1	0	1	0	1	0	0	0	0
70	3	3	5	3	3	3	6	1	5	3	1	3	1	1	3	2	5	5	5	1	5	1	1	0	1	0	1	1	1	1	1	0	1	0	0	0	0	0	0	0	0	0		0	1	0	0	1	1
71	5	6	6	5	5	5	5	5	4	5	5	2	6	6	4	5	3	3	3	6	3	3	3	2	2	1	3	2	2	1	2	2	2	1	2	1	0	0	0	0	0	0		0	0	0	0	0	0
72	3	5	3	4	5	2	3	4	3	3	6	3	2	6	1	3	5	4	3	3	2	0	1	1	0	1	1	1	1	1	1	0	2		1	1	0	0	0	0	0	0		0	0	0	0	1	1
73	6	6	6	6	6	6	0	5	0	0	6	0	0	0	6	6	5	5	0	6	5	3	3	3	3	2	3	2	3	3	3	3	3	3	3	3	0	1	0	0	1	0	1	1	0	0	0	0	0
74	4	5	5	5	5	6	6	6	5	6	0	2	3	6	1	4	6	6	5	5	5	0	3	2	2	2	2	2	1	2	0	3	2	0	1	1	0	0	0	0	0	0		0	0	0	0	0	0
75	5	5	5	5	5	5	6	0	6	3	4	3	5	5	5	2	5	4	2	4	6	0	2	2	1	1	3	2	1	1	2	2	1	0	1	1	0	0	0	0	0	0		0	0	0	0	0	1
76	1	0	0	6	1	6		5		5	5			1	1	5	6						2	3	2	1	3	2	3	2	2	1	2	2	3	3	0	1	1	1	0	1	1	0	0	0	0	0	1
77	3	4	3	3	1	5	6	3	5	0	3	3	3	5	0	3	6	5	4	3	4	0	2	1	2	2	3	2	2	1	1	1	2	1	1	1	0	0	0	0	0	0		0	1	0	0	1	1
78	1	3	2	6	1	1	6	1	6	1	0	6	1	5	0	1	6	6	6	1	5	0	1	1	1	0	3	1	2	0	1	0	3	0	1	0	0	1	0	1	0	1	1	0	0	0	0	1	1
79	6	5	6	6	0	5	6	5	6	4	3	3	5	3	0	5	6	6	5	2	4	0	1	1	2	2	3	1	2	0	1	1	1	2	1	1	0	1	0	0	1	1	1	1	0	0	0	0	1
80	3	3	4	6	2	1	6	3	5	0	0	1	3	5	4	2	6	6	6	3	5	1	2	1	0	1	3	2	3	0	1	1	2	1	1	1	0	1	0	1	1	0	1	0	0	0	0	0	1
81	5	5	5	6	3	3	6		6					3	0	1	6	6	6	3	5	1	3	1	2	3	2	2	2	0	2	1	3	3	1	0	0	0	0	0	0	0		0	0	0	0	0	0
82	5	5	5	5	3	0	5	3	5	3	3	5	2	5	3	0	6	6	6	5	5	1	1	1	0	1	2	1	2	1	1	0	2	0	1	0	0	1	1	0	0	0	1	0	0	0	0	1	1
83	0	1	0	6	0	0	6	0	6	0	0	6	0	0	0	0	6	6	6	0	6	0	1	0	0	1	1	1	1	1	0	0	0	0	0	0	0	0	0	0	0	0		0	0	0	0	0	1
84	3	5	4	5	6	4	4	4	5	5	6	2	6	6	2	2	5	4	3	5	4	1	2	1	1	2	2	2	1	2	3	0	2	1	1	1	0	0	0	0	0	0		1	1	0	0	0	1
85	3	2	5	5	1	1	6	1	5	0	0	5	5	4	1	1	6	5	5	1	6	6	2	1	1	1	3	1	2	2	2	1	2	2	1	1	0	0	0	0	0	0		0	1	0	0	0	1
86	4	4	5	4	4	2	6	3	5	5	4	2	4	4	2	5	5	5	5	4	4	2	2	1	2	1	3	1	1	2	1	1	2	1	1	1	0	0	0	0	0	0		0	0	0	0	0	0
87	4	5	5	6	2	0	6	4	6	2	6	5	0	6	1	0	6	6	6	5	5	2	2	1	3	0	3	1	2	2	2	0	1	0	1	1	0	0	0	0	0	0		0	0	0	0	1	1
88	3	5	5	6	0	0	6	3	6	0	0	3	0	3	0	3	6	6	5	5	6	1	1	1	3	1	3	1	2	2	2	0	1	2	2	0	0	0	0	0	0	0		0	0	0	0	1	1
89	3	3	3	3	1	3	6	1	6	0	0	5	1	1	1	2	6	6	6	1	1	1	1	0	1	1	2	0	2	2	2	0	2	0	2	2	0	0	0	0	0	0		0	0	0	0	0	0
90	5	4	5		3	5	6	2	4	0	0	4	5	6	1	3	5	5	5	4	5	3	2	1	3	0	3	1	2	1	2	1	2	0	1	1	0	0	0	0	0	0		1	0	0	0	0	1
91	0	1	0	5	2	0	5	0	1	0	0	5	1	0	1	0	5	5	3	0	6	0	1	0	0	0	0	0	1	1	0	0	1	0	0	0	0	0	0	0	0	0		0	0	0	0	0	0
92	6	5	5	6	5	6	6	6	6	6	4	6	6	6	5	6	6	6	6	5	6	4	3	1	2	1	2	0	1	1	2	1	2	1	2	0	0	1	1	0	0	0	1	1	0	0	0	1	1
93	5	6	1	6	5	0	6	5	4	0	3	1	5	5	5	0	6	6	4	6	0	3	3	1	2	0	3	1	3	1	2	1	3	1	2	3	0	1	0	0	1	0	1	0	0	0	0	1	0
94	3	3	4	5	4	2	5	2	2	2	3	4	3	3	1	3	6	5	5	2	5	2	2	0	1	0	2	1	2	1	1	1	1	1	1	1	0	0	0	0	0	0		0	0	0	0	0	0
95	5	5	6	4	6	6	3	5	3	6	6	0	6	6	5	5	5	1	1	6	3	2	3	2	3	2	3	2	3	3	2	1	2	2	2	1	1	1	0	0	1	1	1	0	0	1	0	0	1
96	6	5	5	6	4	5	6	5	4	3	6	5	5	5	3	4	6	5	6	6	4	0	2	1	3	1	3	1	3	2	2	1	3	1	2	1	0	0	0	0	0	0		0	0	0	0	0	0
97	5	6	5	1	5	5	4	6	1	5	2	2	5	5	3	4	5	5	1	5	5	5	2	3	3	2	3	2	1	3	2	1	2	2	2	1	0	1	0	0	1	1	2	0	0	1	0	1	0
98	1	3	3	5	6	0	6	3	3	0	0	5	0	3	6	0	6	5	0	3	3	0	2	1	3	1	3	1	3	0	2	0	1	1	1	3	0	1	0	0	1	1	1	0	0	0	0	1	0
99	3	3	3	6	3	6	6	3	6	0	0	6	0	2	0	0	6	6	6	0	6	5	1	0	0	0	1	0	2	0	0	0	0	0	0	2	0	0	0	0	0	0		0	1	0	0	1	1
100	3	3	3	6	1	1	6	2	4	0	0	1	0	1	0	0	5	3	3	1	0	1	3	1	0	0	3	1	2	0	2	0	2	1	2	1	0	0	0	0	0	0		0		1	1	1	1
101	2	1	1	5	3	0	6	0	6	0	1	6	0	2	1	1	6	6	6	1	6	0	2	1	1	1	2	0	2	0	1	2	3	1	0	0	0	0	0	0	0	0		1	1	0	0	0	1
102	5	6	6	6	5	0	6	3	5	0	3	3	0	6	5	3	6	6	6	2	6	0	3	1	1	0	3	0	1	1	1	0	3	1	1	0	0	0	0	0	0	0		0	1	0	0	0	1
103	5	5	3	6	5	3	6	0	5	5	1	1	0	3	3	2	6	5	5	0	4	3	2	1	1	1	2	0	2	2	1	0	0	0	0	0	0	0	0	0	0	0		0	0	0	0	1	1
104	0	0	0	1	0	1	0	0	2	0	1	6	1	0	1	1	6	4	4	1	0	0	1	0	0	0	0	0	1	1	0	0	2	0	0	0	0	0	0	0	0	0		0	0	0	0	1	1
105	0	1	1	3	1	0	0	0	6	0	0	5	0	0	0	0	6	6	6	3	5	0	2	0	0	0	1	0	2	1	1	0	3	0	0	0	0	0	0	0	0	0		0	0	0	0	0	0
106	6	5	5	6	4	4	6	5	6	2	6	3	6	6	0	0	6	5	5	5	2	6	3	3	2	1	3	2	1	2		1	3	1	2	0	0	0	0	0	0	0		0	0	0	0	1
107	5	5	5	6	0	1	6	1	6	0	1	5	6	6	0	1	6	6	6	1	5	0	2	1		1	2	1	2	2	1	0	2	1	1	0	0	1	0	0	1	1	2	0	0	0	0	0
108	1	1	0	3	0	0	6	1	6	0	0	5	0	2	0	0	6	6	5	1	6	1	1	1	1	0	1	1	1	0	1	0	2	0	1	0	0	0	0	0	0	0		0	1	0	0	1	1
109	3	4	5	5	3	5	5	2	5	1	4	3	2	2	1	1	5	5	5	1	5	0	2	1	1	1	2	1	2	1	1	0	1	0	1	0	0		0	0	0	0			0	0	0	1	0
110	0	5	6	6	0	6	5	1	2	0	0	1	5	2	3	6	5	5	3	1	0	1	2	1	3	1	2	2	2	2	1	1	0	2	3	0	0	1	0	0	1	0	1	0	0	0	0	0	1
111	6	6	6	5	5	3	5	5	6	3	6	2	6	6	0	5	5	6	6	6	5	5	3	3	3	2	3	2	2	0	1	0	3	1	1	1	0	0	0	0	0	0		0	0	0	0	0	1
112	1	1	0	0	2	0	6	0	5	1	0	6	0	0	1	0	6	6	6	0	6	0	1	0	2	0	1	0	1	1	1	0	0	0	0	0	0	0	0	0	0	0		0	0	0	0	0	0
113	5	4	5	0	0	0	3	0	6	0	0	1	4	3	0	0	6	0	5	1	6	1	1	1	0	0	0	1	0	1	0	1	1	2	0	0	0	0	0	0	0	0		0	0	0	0	0	0
114	4	1	3	6	2	1	6	1	3	1	1	1	2	5	2	3	5	3	1	1	5	4	3	1	2	1	3	2	2	1	1	0	3	1	1	1	0	1	0	0	1	1	2	0	0	0	0	0	1
115	3	3	3	3	3	3	3	3	3	2	2	4	1	5	3	3	6	6	6	3	1	1	3	1	3	1	3	1	2	1	3	0	3	1	2	1	1	1	1	1	1	1	2	0	0	0	0	1	1
116	1	4	4	6	4	2	6	0	1	0	0	6	5	4	0	0	4	5	5	1	6	0	1	0	0	0	0	0	1	0	1	0	1	0	0	0	0	0	0	0	0	0		1	0	0	0	1	1
117	3	4	5	6	3	2	6	3	5	1	3	2	4	4	4	1	5	5	4	4	4	1	3	1	2	1	3	1	2	1	0	0	3	1	0	1	0	0	0	0	0	0		0	1	0	0	1	1
118	3	6	6	5	5	6	1	5	3	3	0	3	6	5	5	3	5	1	1	3	5	1	2	1	0	1	2	1	2	3	0	0	2	0	1	0	0	0	0	0	0	0		0	0	0	0	0	0
119	3	4	5	5	5	5	6	1	5	0	0	5	1	6	0	5	6	6	6	3	3	0	3	2	2	1	3	1	1	1	1	0	2	2	1	0	1	0	0	0	0	0			1	1	0	1	1
120	1	3	3	6	0	3	6	1	6	0	0	6		1	0	1	6	6	6	0	6	0	1	1	0	0	1	1	1	1	1	0	1	1	1	0	0	0	0	0	0	0		0	0	0	0	1	1
121		3	3	4	0	1	3	1	5	1	1	5	1	1	0	1	3	5	6	1	3	1	1	0	1	0	1	1	2	1	1	0	1	0	1	0	0	0	0	0	0	0		0	0	0	0	1	1
122	5	5	6	5	5	4	6	3	6	1	1	3	5	6	0	1	6	6	6	3	5	1	3	1	3	1	3	1	2	1	3	1	1	1	2	1	0	1	0	0	1	0	2	0	0	0	0	1	0
123	1	3	0	3	3	3	6	1	1	0	1	5	2	3	2	3	6	5	5	1	5	0	2	1	2	0	2	0	1	1	1	0	2	0	1	0	0	1	1	1	0	0	1	1	0	0	0	1	1
124	6	5	5	5	3	3	5	5	6						3	3	5	6	4	5	4	5	2	2	2	2	3	2	2	2	3	2	2	1	2	2	0	0	0	0	0	0		0	1	0	0	0	1
125	0	0	0	0	0	0	0	0	6	0	0	6	0	0	0	0	6	6	6	0	6	0	1	0	0	0	2	0	0	0	1	0	2	0	0	0	0	0	0	0	0	0		0	0	0	0	1	1
126	1	1	1	6	0	1	6	1	5		0	6	0	1	0	0	6	6	6	0	5	0	1	0	0	0	1	0		1	1	0	3	0	0	0	0	0	0	0	0	0		0		0	0		1
127	5	6	5	5	5	3	5	3	3	6	0	4	3	5	5	2	6	0	5	5	5	4	2	0	2	0	2	0	1	1	1	1	0	0	1	0	0	1	1	1	0	0	1	1	0	0	0	0	1
128	5	6	5	5	5	3	5	3	3	6	0	4	3	5	5	2	6	0	5	5	5	4	2	0	2	0	2	0	1	1	1	1	0	0	1	0	0	1	1	1	0	0	1	1	0	0	0	0	1
129	0	3	1	6	0	0	6	4	3	1	0	5	3	3	0	0	6	6	5	1	6	0	2	0	1	0	2	0	0	1	1	0	1	0	1	0	0	0	0	0	0	0		0	1	0	0	1	1
130	6	5	6	6	6	5	6	5	3	6	6	5	6	6	6	0	5	0	5	5	0	0	2	1	0	3	3	2	2	0	1	2	2	2	0	1	0	0	0	0	0	0		0	0	0	1	0	0
131	3	5	1	6	0	0	6	1	6	0	0	6	0	1	0		6	6	6	1	2	0	1	0	0	0	1	0	2	0	0	0	3	0	0	0	0	0	0	0	0	0		0	1	0	0	1	0
132	3	4	6	6	5	5	6	4	5	0	4	5	2	6	1	2	6	6	5	4	3	2	2	1	3	1	3	2	3	2	3	1	3	2	3	2	0	1	0	0	1	1	1	0	0	0	0	0	0
133	3	4	6	6	5	5	6	4	5	0	4	5	2	6	1	2	6	6	5	4	3	2	2	1	3	1	3	2	3	2	3	1	3	2	3	2	0	1	0	0	1	1	1	0	0	0	0	0	0
134	5	6	5	6	4	4	4	5	6	0	0	3	0	6	0	5	4	5	6	5	1	3	3	2	2	1	3	1	3	2	2	0	3	3	3	2	0	1	0	0	1	0	2	1	0	0	1	0	0
135	3	3	1	5	4	0	6	1	6	0	0	5	1	3	1	1	6	6	5	1	6	1	2	0	3	2	3	1	3	1	1	0	3	0	1	0	0	0	0	0	0	0		0	0	0	0	0	1
136	6	6	6	5	5	5	5	6	5	6	6	3	6	3	5	5	5	5	2	6	4	5	3	3	2	1	3	2	2	3	3	1	2	2	2	1	1	1	0	0	1	0	2	0	0	1	0	1	1
137	4	4	2	4	0	0	6	1	4	0	3	5	2	5	1	0	6	5	2	3	5	1	1	1	2	1	2	1	2	1	1	1	2	1	2	2	0	0	0	0	0	0		0	1	0	0	1	1
138	4	4	5	6	3		6	3			1	6	3	3	0	1	6	6	6	1	6	0	1	0	1	1	3	0	1	0	1	1	0	0	0	0	0	0	0	0	0	0		0	1	0	0	1	1
139	1	1	1	6	0	0	6	0	5	0	1	5	2	4	1	3	6	6	5	1	5	0	2	0	1	0	1	1	2	0	0	0	2	0	0	0	0	0	0	0	0	0		0	0	0	0	1	1
140	1	2	2	5	6	5	4	2	4	6	5	2	1	5	6	2	5	5	3	5	5	3	1	2	2	2	2	1	1	1	1	0	0	1	1	2	0	1	0	0	1	0	1	0	0	0	0	0	1
141	4	4	5	4	4	5	2	4	1	3	4	1	5	5	3	5	1	3	2	5	2	6	2	3	2	2	3	2	3	2	2	1	2	3	2	3	0	0	0	0	0	0		0	0	0	0	0	0
142	5	5	6	5	6	5	5	4	4	4	4	3	5	6	5	3	6	3	4	6	3	3	3	1	2	2	3	2	2	1	1	2	3	1	1	1	0	1	0	0	1	0	1	1	0	0	0	0	1
143	1	0	2		0	0	6	0	6	0	3	5	5	6	0	0	6	5	6	0	2	0	2	0	0	0	3	0	2	1	1	2	2	0	2	3	0	0	0	0	0	0		0	0	0	0	1	1
144	4	5	5	5	0	2	5	1	5	0	1	3	1	1	0	1	6	6	5	1	5	1	1	0	0	0	1	0	1	1	1	0	2	0	1	0	0	0	0	0	0	0		0	0	0	0	1	1
145	4	5	5	5	0	2	5	1	5	0	1	3	1	1	0	1	6	6	5	1	5	1	1	0	0	0	1	0	1	1	1	0	2	0	1	0	0	0	0	0	0	0		0	0	0	0	1	1
146	6	6	6	6	0	6	6	6	5	0	0	2	6	6	0	5	6	5	4	6	3	6	3	1	3	1	3	2	3	3	3	0	2	1	2	1	1	0	0	0	0	0		0	1	0	1	1	1
147	5	6	6	5	6	2	6	5	0	6	6	0	5	6	5	4	5	4	5	5	3	0	2	3	2	1	3	2	2	1	2	1	3	3	1	3	0	0	0	0	0	0		0	0	0		1	0
148	3	3	5	5	2	1	6	1	5	2	2	5	1	1	1	1	5	5	5	1	5	1	1	0	1	0	1	1	1	1	1	0	1	0	1	0	0	0	0	0	0	0		0	0	0	0	1	1
149	5	4	3	5	6	6	5	4	3	3	4	3	4	4	2		4	5	4	3	3	2	2	1	1	1	3	1	2	3	1	0	0	1	1	1	0	0	0	0	0	0		0	0	0	0	1	1
150	1	1	1	5	1	0	6	0	6	1	1	6	2	3	1	0	6	6	6		6	0	1	0	0	0	1		1	0	0	1	0	0	0	0	0	0	0	0	0	0		0	0	0	0	1	1
151	4	5	5	5	2	5	6	4	4	0	4	2	5	6	1	5	5	6	5	5	5	6	2	1	1	1	2	2	2	2	2	1	2	1	2	1	0	0	0	0	0	0		0	0	0	0	1	1
152	1	5	5	3	3	0	5	1	6	5	1	5	0	6	4	0	6	3	5	3	6	0	2	1	1	2	2	0	2	1	2	0	2	1	1	1	0	0	0	0	0	0		0	1	0	0	0	0
153	3	5	0	6	0	5	6	1	5	0	0	5	1	3	0	0	6	6	6	0	6	0	2	0	0	0	3	0	1	0	1	0	3	0	1	0	0	0	0	0	0	0		0	0	0	0	1	1
154	1	3	1	6	3	0	3	1	3	1	0	6	0	1	1	0	6	5	3	1	1	0	1	1	0	1	1	1	2	1	0	0	3	0	1	1	0	0	0	0	0	0		0	0	0	0	0	1
155	3	3	3	3	0	2	6	3	4	0	0	5	3	4	0	2	5	6	5	1	6	1	2	0	2	0	2	1	1	1	0	0	0	0	2	0	0	0	0	0	0	0		0	0	0	0	1	0
156	1	1	0	6	0	0	6	0	2	0	0	5	0	1	1	0	6	6	3	0	6	0	1	0	0	0	2	0	1	1	1	0	1	1	1	1	0	0	0	0	0	0		0	0	0	0	0	0
157	2	4	3	4	3	3	5	3	5	2	3	5	3	3	5	2	5	6	5	2	4	6	2	1	2	1	3	0	1	1	2	1	2	1	1	1	0	0	0	0	0	0		0	0	0	0	1	1
158	6	5	4	5	3	3	6	3	5	3	2	2	3	6	0	2	5	3	5	4	3	4	3	1	1	1	3	0	3	1	2	0	0	2	1	2	0	0	0	0	0	0		0	0	0	0	0	1
159	1	3	0	1	0	5	6	1	1	1	0	5	1	5	0	0	5		6	1	6	0	2	0	0	1	3	1	1	0	0	1	0	0	1	1	0	0	0	0	0	0		0	0	0	0	0	0
160	6	6	5	6	0	6	6	5	5	0	0	5	6	6	0	5	5	6	6	6	5	6	3	1	3	2	3	2	3	1	1	2	2	2	1	3	0	1	1	1	0	0	1	0	0	0	0	0	0
161	5	5	5	5	3	0	3	5	0	0	0	0	5	6	3	0	5	3	3	5	5	0	3	2	1	2	3	2	2	2	3	1	2	2	3	2	1	0	0	0	0	0		0	0	0	0	0	0
162	1	1	1	6	1	0	6	1	5	0						1	5	5	3	1	5	0	2	1	1	2	3	2	2	1	2	1	1	2	1	1	0	1	1	1	0	0	1	0	1	0	1	0	1
163	3	4	5	5	4	3	5	3	5	1	1	3	2	6	3	3	5	5	5	3	5	1	2	1	3	1	3	1	2	2	2	1	2	1	2	1	0	1	1	1	1	1	1	0	0	0	0	1	1
164	2	1	3	6	0	4		1	6	0	0	6	5	6	0	1	5	5	6	1	5	3	1	0	0	0	0	1	2	1	0	0	2	0	0	3	0	0	0	0	0	0		0	0	0	0	1	1
165	3	2	1	3	2	1	6	6		0	1	5	2	4	0	0	6	5	6	1	6	0	1	1	0	0	1	1	2	1	0	0	2	1	0		0	0	0	0	0	0		0	1	0	0	1	1
166	0	0	1	6	0	1	6	0	6	0	0	6	0	1	0	1	6	6	6	0	6	0	1	0	1	1	1	1	1	1	1	0	2	1	1	0	0	0	0	0	0	0		0	0	0	0	1	1
167	1	1	1	3	4	3	6	1	5	0	1	6	3	4	4	0	6	6	6	1	4	2	1	0	0	0	1	0	2	1	1	1	2	1	0	0	0	0	0	0	0	0		0	1	0	0	1	0
168	3	1	3	2	0	0	6	1	6	2	1	5	0	0	0	0	6	6	6	1	5	1	1	1	0	0	1	1	1	1	0	0	3	0	1	0	0	0	0	0	0	0		0	0	0	0	1	1
169	1	1	1	6	0	0	6	0	6	0	0	6	0	0	0	0	6	6	6	1	6	0	1	0	0	0	1	0	1	1	1	0	0	0	1	0	0	0	0	0	0	0		0	0	0	0	0	1
170	0	1	2	6	0	0	6	0	6	0	0	6	1	1	0	1	6	6	6	0	5	0	1	0	0	0	1	0	1	0	0	0	3	0	0	0	0	0	0	0	0	0		0	0	0	0	0	1
171	0	0	0	6	0	0	6	0	6	6	6	6	1	0	0	0	6	6	6	0	6	5	1	0	0	0	0	0	0	0	1	0	3	0	0	0	0	0	0	0	0	0		0	0	0	0	0	0
172	3	3	5	5	1	0	6	2	5	0	0	4	0	5	3	2	6	4	5	4	3	3	2	1	2	1	3	1	2	0	1	0	2	1	1	1	0	0	0	0	0	0		0	0	0	0	0	0
173	5	5	6	6	5	6	5	6	6	0	0	1	6	5	0	1	6	6	6	6	5	0	3	3	1	2	3	2	3	3	2	0	1	0		1	0	1	1	1	0	0	1	0	0	1	0	1	1
174	5	5	6	3	3	6	4	5	3	5	6	3	5	6	6	6	3	3	3	5	3	3	3	2	3	3	3	2	3	1	3	1	2	3	2	1	1	1	0	0	1	0	2	0	0	0	0	1	1
175	5	5	3	5	5	4	5	3	3	4	6	5	0	5	0	0	6	4	5	5	0	0	2	2	0	1	2	2	3	1	1	2	3	2	0	2	0	0	0	0	0	0		0	1	0	0	1	1
176	5	5	4	6	0	1	6	1	6	0	1	3	3	6	0	1	6	5	1	1	1	1	1	1	3	1	3	1	2	2	3	0	2	1	3	0	0	1	1	1	0	0	1	0	1	0	0		1
177	5	5	6	5	4	3	5	2	6	2	1	5	2	6	3	0	3	6	6	3	4	1	2	0	1	0	1	1	1	1	1	1	1	0	0	0	0	0	0	0	0	0		0	1	0	0	1	0
178	5	5	5	5	5	0	5	0	2	3	0	4	2	2	6	0	4	3	0	2	6	6	2	3	3	1	3	2	2	1	0	0	0	0	0	1	0	0	0	0	0	0		0	0	0	0	0	0
179	3	3	4	4	3	3	5	3	3	4	6	1	6	3	3	1	5	5	3	1	5	3	2	0	2	1	2	2	2	1	1	1	2	0	1	0	0	1	0	0	1	0	1	0	0	0	0	1	1
180	5	5	6	6	5	5	6	6	4	4	5	2	6	6	4	4	6	3	2	6	2	0	3	2	2	1	3	2	2	1	2	2	2	2	2	3	0	1	0	1	0	0	1	1	1	0	0	0	0
181	1	1	3	3	1	2	6	1	5	0	0	5	2	1	0	1	6	6	6	1	3	1	1	1	1	0	1	0	1	1	1	0	2	0	1	0	0	0	0	0	0	0		0	0	0	0	1	1
182	6	5	5	4	5	4	5	5	3	4	6	3	6	4	4	3	5	5	3	5	4	2	2	3	3	2	2	2	2	3	2	1	1	2	1	2	1	1	0	0	1	0	2	0	0	1	1	0	0
183	2	5	5		1	5	6		5	1	1	3	5	5	0	5	6	6	5	3	6	0	2	1	2	1	2	1	1	1	2	1	1	1	1	0	0	0	0	0	0	0			1	0	0	1	1
184	3	2	1	6	0	3	6	3	3	3	3	3	6	3	1	2	5	5	2	0	2	0	1	1	0	1	2	1	1	1	1	0	2	2	0	1	0	0	0	0	0	0		0	0	0	0	1	1
185	0	0	0	0	1	0	0	1	6	0	0	5	1	0	0	0	5	6	5	0	6	0	1	0	0	0	1	0	1	1	0	0	1	0	1	0	0	0	0	0	0	0		0	0		1	1	1
186	0	1	3	1	3	0	5	0	3	0	3	3	3	0	1	1	3	3	1	0	3	6	1	0	0	0	2	0	0	1	0	0	1	0	0	0	0	0	0	0	0	0		0	0	0	0	0	1
187	2	4	5	5	1	2	6	1	6	0	0	0	1	3	1	1	6	6	6	1	6	0	1	1	0	0	1	0	0	1	0	0	0	0	0	0	0	0	0	0	0	0		0	0	0	0	1	1
188	5	6	5	5	5	6	5	5	4	5	5	3	5	5	5	5	5	4	4	5	5	5	3	2	1	1	3	2	2	2	2	1	3	1	2	1	0	0	0	0	0	0		0	0	0	1	1
189	6	6	6	3	3	3	6	6	5	1	5	0	5	6	0	5	5	5	5	5	3	3	3	2	3	2	3	2	3	0	3	2	3	1	3	2	1	0	0	0	0	0		0	1	1	1	0	0
190	4	5	5	5	5		6	4	5	0	0	5	5	5	2	0	6	6	5	5	3	1	1	0	3	0	1	2	2	0	1	0	3	0	1	0	0	1	1	0	1	1	1	0	0	0	1	1	1
191					5	0			5		5				5	0	6				6	5	1	0	0	0	1	0	1	1	0	0	1	0	0	0	0	0	0	0	0	0		0	0	0	0	1	0
192																							1	0	2	1	1	1	1	1	0		1	2	1	3			0	0	0	0
193	5	5	5	6	2	2	5	5	3	1	1	5	5	4	1	0	6	1	5	2	2	0	2	1	1	1	1	1	2	1	1	0	3	1	2	1	0	1	1	1	0	0	1	0	1	0	0	0	0
194	2	4	6	6	3	3	6	3	6	0	3	4	1	4	0	4	6	6	6	3	6	1	2	0	2	0	3	0	1	1	1	1	0	1	1	0	0	0	0	0	0	0		0	1	0	0	1	1
195	3	4	1	6	1	0	6	1	6	1	0	6	0	5	0	1	6	6	6	0	6	1	1	0	0	0	2	1	1	0	1	0	1	0	0	0	0	1	0	1	0	0	2	0	1	0	0	1	1
196	1	1	1	5	4	1	6	1	6	0	0	1	1	0	1	1	4	6	5	1	5	4	1	0	0	0	1	1	1	1	0	1	0	1	1	0	0	0	0	0	0	0		0	1	0	0	1	1
197	3	4	5	6	5	5	6	2	6	4	4	3	6	6	5	2	6	6	6	2	5	2	3	1	2	1	3	1	2	1	2	0	3	1	1	1	1	1	0	0	1	1	2	0	1	1	1	1	1
198	5	6	3	5		3	4	5	3	4	2	3	6	6	3	4	2	3	4	6	2	3	2	1	2	1	2	2	2	2	2	1	2	1	2	1	1	1	0	0	1	0	2	0	0	0	0	1	1
199	4	5	2	6	0	5	6	4	5	5	0	3	4	5	0	1	2	3	5	5	4	0	2	1	0	1	3	1	2	1	1	1	0	1	1	0	0	1	1	1	0	0	1	0	1	0	0		0
200	5	1	5	6	5	6	5	5	5	5	6	0	5	5	3	5	5	5	5	5	0	6	2	1	1	2	3	2	2	2	0	1	2	2	1	2	0	0	0	0	0	0		0	0	0	0	0	1
201	3	3	5	5	2	3	5	2		2	4	1	6	3	3	0	5	5	1	3	5	4	3	2	2	2	3	2	3	0	3	1	3	1	1	2	0	0	0	0	0	0		0	0	0	0	1	1
202	5	5	5	3	1	3	5	1	3	3	6	1	2	5	3	0	6	3	6	3	2	0	1	3	0	3	3	2	1	2	0	1	0	3	1	2	0	0	0	0	0	0		0	0	0	0	1	1
203	3	4	4	6	0	2	6	3	6	1	6	1	6	5	0	5	6	5	6	6	5	1	3	2	0	2	2	2	3	1	0	1	3	2	0	1	0		0	0	0	0		0	0	0		1	0
204	1	1	0	6	0	3	6	0	6	6	6	5	1	1	0	1	6	6	6	1	6	0	1	0	0	2	0	1	3	1	1	0	1	0	0	0	0	0	0	0	0	0		0	0	0	0	1	1
205	5	5	5	6	0		6	5	5	5	6	5	4	6	0	4	6	6	5	5	6	0	3	1	2	0	2	1	1	1	1	0	1	0	1	1	0	0	0	0	0	0		0	0	0	0	1	1
206	5	5	4	6	5	3	6	3	6	5	0	3	5	4	1	1	3	4	6	4	6	2	3	0	3	1	2	2	2	3	3	2	1	2	3	2	1	1	0	0	1	1	2	0	0	1	1	0	0
207	1	3	4	3	2	1	5	0	4	0	0	3	1	2	0	0	6	6	6	0	5	1	1	1	0	0	1	1	1	1	1	0	1	0	1	0	0	0	0	0	0	0		0	0	0	0	0	0
208	6	6	6	0	6	6	5	6	3	6	5	1	6	6	5	6	5	5	1	6	5	6	3	3	2	0	3	3	1	0	0	0	1	0	0	0	0	0	0	0	0	0		0	0	0	0	1	0
209	5	5	4	5	2	5	6	2	5	0	0	3	6		0	5	5	5	5	5	6	2	3	1	3		3	2	2	1	2	0	0	1	1	1	0	0	0	0	0	0		0	0	0	1	1	1
210	4	4	4	5	5	1	5	5	3	2	1	3	6	3	1	5	5	5	3	3	3	1	2	1	1	1	2	1	3	1	1	1	3	1	1	1	0	0	0	0	0	0		0	0	0	0	0	0
211	4	4	1	5	4	2	6	1	1	2	1	5	1	3	1	1	6	5	6	1	4	0	1	0	0	0	1	1	3	1	2	0	0	0	1	0	0	1	0	1	0	0	1	0	0	0	0	1	1
212	5	5	5	5	0	5	5	5	3	3	5	0	6	6	1	5	5	4	1	5	1	6	3	2	0	2	2	2	3	1	0	1	0	3	0	0	0	0	0	0	0	0		0	0	0	0	0	0
213	5	5	6	6	0	0	6	6	6	0	0	5	6	6	0	0	6	6	6	6	6	3	2	1	3	1	3	1	1	2	3	1	0	2	2	2	1	1	0	0	1	0	2	0	0	1	0	1	0
214	5	4	5	4	0	1	6	1	6	0	1	5	1	6	0	3	6	6	6	3	5	4	1	1	0	0	2	1	0	2	0	0	3	0	2	0	0	0	0	0	0	0		0	1	0	0	0	1
215	4	3	4	6	0	2	5	1	3	0	0	3	6	0	1	1	6	4	3	3	6	6	2	3	0	1	2	1	0	1	0	0	0	3	0	0	0	0	0	0	0	0		0	0	0	0	1	1
216	5	4	5	5	5	5	5	6	5	3	2	1	5	3	1								2	2	3	1	3	2	2	2	2	1	1	2	2	1	1	1	1	0	1	0	2	0	0	0	0	1	1
217	5	4	5	5	5	5	5	6	5	3	2	1	5	3	1								2	2	3	1	3	2	2	2	2	1	1	2	2	1	1	1	1	0	1	0	2	0	0	0	0	1	1
218	6	6	6	5	5	5	6	6	5	2	5	2	6	6	2	2	3	2	2	6	3	3	2	1	1	1	2	2	2	3	1	0	1	1	1	1	0	1	1	1	0	0	1	0	0	0	0	1	0
219	3	2	1	6	0	3	6	1	5	1	1	5	3	3	3	2	5	6	6	0	5	5	2	1	2	1	3	2	2	2	3	1	1	2	3	1	0	0	0	0	0	0		0	1	0	0	1	1
220	5	5	3	6	3	4	6	3	4	3	6	5	4	5	2	2	6	6	6	4	4	5	3	1	1	1	3	1	2	0	1	0	3	1	1	1	0	0	0	0	0	0		0	1	0	0	0	1
221	1	1	1	1	1	2	5	1	3	3	0	3	3	3	3	1	3	3	3	1	0	0	1	1	1	1	1	0	1	1	0	0	2	1	0	0	0	0	0	0	0	0		0	0	0	0	0	1
222	5	6	5	6	0	5	5	2	3	0	0	3	6	5	0	6	5	4	3	3	0	0	3	1	3	1	3	2	2	2	2	0	1	1	1	0	1	1	1	1	1	0	1	0	0	0	1	1	1
223	5	6	6	6	1	6	6	6	5	0	5	3	6	6	6	6	6	6	6	6	0	5	2		3	3	3	2	3	3	3	3	0	3	3	3	1	1	0	1	1	0	1	0	0	0	0	1	1
224	4	5	6	4	5	2	5	4	5	6	5	3	6	6	5	1	6	5	5	3	1	0	3	2	3	1	2	2	2	1	2	1	1	1	1	1	0	1	0	1	0	0	1	0	1	0	0	0	0
225	0	1	0	6	0	1	6	1	6	0	0	6	0	2	0	0	6	0	6	0	6	1	0	0	0	0	0	0	3	0	0	3	3	0	0	0	0	0	0	0	0	0		0	0	0	0	0	0
226	5	6	6	6	1	0	6	5	3	0	5	1	6	6	0	0	6	6	6	6	5	3	2	3	3	2	2	2	2	2	1	1	1	1	1	0	0	0	0	0	0	0		0	0	0	0	1	1
227	4	3	2	2	3	0	5	3	4	0	0	5	1	0	0	0	5	5	3	1	1	0	3	1	2	1	3	1	2	1	1	1	2	0	2	0	0	1	0	1	0	0	1	0	0	0	0	1	1
228	1	2	3		3	6	6	1	3	1	1	5	2	1	1	0	5	5	6	1	3	3	2	1	0	0	0	1	2	0	0	0	3	0	0	0	0	0	0	0	0	0		0	0	0	0	1	1
229	1	3	0	6	0	6	6	1	6	0	0	6	0	6	0	6	6	6	6	1	6	1	1	0	0	0	1		1	1	1	0	1	0	1	1	1	1	1	1	0	0	2	0	1	0	1	1	1
230	3	2	2	6	3	3	6	0	5	2	2	4	0	4	3	1	6	5	6	1	5	0	1	1	0	1	2	1	1	1	0	1	1	1	0	0	0	1	0	0	1	0	1	1	0	0	0	0	1
231	3	4	4	6	2	4	6	4	6	0	6		3	6	2	4	5	6	6	5	5	1	3	2	2	3	3	2	3	1	2	3	3	3	1	3	0	0	0	0	0	0		0	0	0	0	1	0
232	5	6	5	6	0	4	6	4	6	0	3	0	3	6	0	4	6	6	6	5	6	2	2	0	1	0	3	0	2	2	3	0	1	2	2	1	0	1	0	0	1	0	2	0	0	0	0	1	0
233	5	3	5	6	0	0	6	5	6	0	6	5	1	6	0	0	6	6	6	3	6	0	2	2	0	2	3	2	3	2	1	2	3	2	1	3	0	0	0	0	0	0		0	1	0	0	0	0
235	1	1	1	5	1	1	6	1	5	5	0	4	1	1	0	1	5	5	3	1	5	0	1	1	1	1	1	1	2	1	1	0	1	1	1	0	0	1	0	1	0	0	1	0	0	0		1	1
236	1	4	6	6	6	6	6	1	6	1	3	0	4	5	0	1	6	1	5	1	5	0	1	1	2	0	2	0	3	3	1	1	2	1	0	0	0	0	0	0	0	0		0	0	0	1	1	1
237	1	1	1	3	1	1	5	1	6	2	1	6	1	1	0	1	6	6	6	1	6	0	2	0	1	0	3	0	1	0	1	0	2	0	0	0	0	0	0	0	0	0		0	0	0	0	0	1
238	5	5	5	6	4	1	6	5	0	4	6	6	5	6	0	3	5	5	0	2	6	3	1	0	1	1	2	1	0	1	1	0	1	0	1	0	0	0	0	0	0	0		0	0	0	0	1	1
239	5	3	3	3	2	3	6	3	3	0	1	4	6	6	0	5	5	6	6	3	3	0	2	1	3	1	2	2	2	2	2	1	2	1	2	1	0	0	0	0	0	0		0		1	1	0	0
240	5	5	5	5	5	5	5	5	4	5	6	2	5	5	4	2	5	1	5	6	2	4	3	3	1	1	3	2	2	2	2	1	2	2	2	2	0	1	0	0	1	0	2	0	1	0	0	0	0
241	4	4	5	6	3	4	5	3	3	3	5	4	4	5	1	4	5	5	4	4	5	3	2	1	2	1	3	1	2	1	2	3	1	1	1	1	0	1	0	0	1	0	1	1	0	0	0	0	0
242	3	2	1	5	1	3	3	1	2	1	1	3	4	3	0	1	5	6	2	1	3	3	2	0	1	0	3	1	1	1	1	0	1	0	1	0	0	0	0	0	0	0		0	0	1	0	1	1
243	3	4	6	0	0	6	5	5	1	6	4	1	4	5	6	6	0	2	0	6	1	1	3	3	3	2	3	2	2	3	3	2	3	3	2	1	0	0	0	0	0	0		1	1	0	0	0	1
244	2	1	1	6	2	3	6	1	5	2	3	5	5	4	2	1	5	5	5	0	6	5	1	0	0	1	2	1	1	1	0	1	2	0	1	0	0	0	0	0	0	0		0	0	0	0	0	1
245	1	1	2	6	3	1	6	0	5	3	4	5	1	2	2	1	5	5	4	1	3	1	1	0	0	0	0	0	1	1	1	0	0	0	0	0	0	0	0	0	0	0		0	0	0	0	1	0
246	3	5	5	5	0	4	6	1	5	0	3	3	3	6	0	0	6	6	6	5	6	0	2	1	1	1	3	1	1	1	0	0	0	0	1	0	0	0	0	0	0	0		0	0	0	1	0	1
247	5	6	5	6	0	4	6	5	6	5	5	5	5	5	0	4	5	6	5	5	6	6	1	1	2	1	3	1	1	1	2	0	0	1	1	0	1	0	0	0	0	0		0	1	1	1	1	1
248	1	3	2	4	2	2	5	2	4	0						3	5	1	3	4	2	1	2	2	1	1	1	1	3	1	1	0	1	1	0	0	0	0	0	0	0	0		0	0	0	0	1	1
249	0	0	1	6	5	0	6	0	6	3	5	6	3	3	4	0	0	5	5	1	5	0	1	0	0	0	1	0	2	1	0	0	1	0	0	0	0	1	0	0	1	0	1	0	1	0	0	1	1
250	0	1	1		0	1	6	0	6		0		0		0	0	0	5			6	0	1	0	2		2	0	2	2	1	0	2	0	1	3	0	0	0	0	0	0		0	0	0	0	0	1
251	2	2	5	6	1	3	6	1	5	0	1	5	5	3	0	3	6	6	5	3	5	5	1	0	0	0	1	0	1	1	1	0	0	0	1	0	0	0	0	0	0	0		0	0	0	0	0	0
252	4	4	5	6	5		6	3	5	0	0	3	5	5	5	3	6	6	5	4	5	2	2	1	3	1	3	1	2	2					2	1	1	1	1	1	0	0	2	0	1	0	0	0	1
253	3	3	4	6	0	0	6	5	6	0	0		4	5	0	0	5	3	5	5	5	5	2	1	1	0	2	1	2	1	1	1	2	1	2	1	0	0	0	0	0	0		0	0	0	0	0	1
254	5	5	4	6	5	4	3	5	3	6	6	0	6	6	6	5	4	0	1	6	4	5	3	3	3	2		2	2	2	3	2	2	3	2	0	0	1	0	1	1	0	1	0	0	0	0	0	1
255	2	1	3	4	6	3	6	1	5	3	0	3	0	3	1	0	6	5	5	2	3	0	2	0	2	0	3	1	1	1	2	0	0	0	2	0	0	0	0	0	0	0		0	0	0	0	1	1
256	2	3	5	6	4	0	6	2	5	0	1	3	6	4	0	3	6	5	4	2	2	1	2	1	1	0	1	1	2	1	1	0	3	1	1	0	1	0	0	0	0	0		0	1	1	1	0	1
257	4	6	6	6	1	1	5	5	5	1	0	1	3	3	1	1	4	5	4	4	2	1	2	1	1	2	2	2	1	2	2	1	0	3	2	0	1	1	0	0	1	0	2	0	0	1	0	0	1
258	2	3	1	6	4	6	5	0	6	0	0	6	2	6	1	4	6	6	5	1	5	1	1	0	0	1	1	1	1	1	0	0	1	2	0	1	1	0	0	0	0	0		0	1	0	1	1	1
259	1	5	5	6	0	5	6	1	6	0	0	1	1	5	0	0	6	5	6	1	6	0	2	0	0	0	1	0	1	1	1	1	0	1	1	1	0	0	0	0	0	0		0	0	0	0	1	1
260	6	5	5	4	6	6	6	6	6	6	6	5	6	5	5	3	6	4	3	5	4	3	3	2	2	2	3	2	2	1	2	0	3	0	2	0	0	1	0	0	1	0	1	0	0	0	1	1	1
261	0	1	0	5	3	0	5	0	5	3	6	6	0	5	5	0	3	5	6	0	6	3	1	0	1	0	1	0	1	0	0	0	2	0	0	0	0	0	0	0	0	0		0	0	0	0	1	1
262	3	5	3	5	3	3	5	3	1	3	6	3	5	4	3	2	3	3	3	3	3	0	1	1	1	1	3	1	1	3	2	2	1	1	0	1	1	1	1	0	1	0	2	0	0	0	0	1	1
263	5	5	5	6	0	1	6	5	3	0	1	5	6	5	0	2	6	5	5	5	6	0	2	0	0	1	1	0	3	0	0	0	0	0	0	0	0	0	0	0	0	0		0	0	0	0	1	1
264	3	3	3	5	0	1	5	3	4	0	0	5	4	3	2	1	5	0	5	1	5	1	1	1	0	0	1	0	1	1	0	0	1	1	0	3	0	0	0	0	0	0		0	0	0	0	1	1
265	1	3	3	5	2	1	6	0	5	0	1	4	0	1	0	0	2	3	4	2	4	1	1	0	0	1	1	1	1	1	0	0	2	0	0	0	0	0	0	0	0	0		0	0	0	0	1	1
266	0	0	0	6	1	0	6	0	6	0	0	0	3	0	0	0	6	6	6	0	6	0	0	0	0	0	1	0	1	0	0	0	0	0	0	0	0	0	0	0	0	0		0	1	0	0	1	0
267	6	5	5	6	5	4	6	5	6	6	5	3	6	5	5	5	6	6	6	2	6	4	2	1	2	1	3	1	1	1	2	0	3	1	0	0	0	1	1	1	0	0	1	0	1	0	1	1	1
268	5	6	6	4	5	3	5	4	3	6	6	0	6	5	3	5	0	3	3	6	1	5	2	1	2	2	2	2	2	2	2	1	3	2	1	1	0	0	0	0	0	0		0	0	0	0	1	0
269	1	2	1	4	3	1	6	0	4	2	1	5	0	1	1	1	5	5	5	0	6	1	0	0	1	0	0	0	0	1	0	0	2	0	0	0	0	0	0	0	0	0		0	0	0	0	1	1
270	3	5	5	3	3	3	5	5	2	4	2	1	5	5	5	4	4	4	4	5	5	2	2	2	3	1	3	2	2	1	2	1	2	1	3	0	0	0	0	0	0	0		0	0	0	0	0	0
271	0	1	0	6	0	1		0	6	0	0	5	0	0	0	0	6	0	5	0	6	0	1	1	0	0	1	0	1	1	1	0	0	0	0	1	0	0	0	0	0	0			0	0	0	1	1
272	5	6	5	6	4	5	3	6	2	0	4	3	3	6	6	2	6	5	2	6	4	5	3	1	3	1	3	1	2	2	2	1	2	1	2	1	1	1	0	0	1	0	2	0	1	0	1	0	1
273	6	6	5	4	6	6	5	6	2	5	6	0	6	6	5	6	3	3	1	6	1	2	3	3	3	3	3	2	2	3	3	2	0	3	2	1	0	1	0	1	1	0		0	0	0	0	0	0
274	3	4	5	5	6	5	5	4	4	6	6	4	6	6	5	5	5	5	4	4	5	4	1	2	1	1	1	1	1	1	1	2	1	1	0	2	0	0	0	0	0	0		1	0	0	0	0	1
275	6	5	6	5	6	6	5	6	6	5	4	0	5	6	5	3	5	4	3	5	4	0	3	3	3	2	3	2	2	3	2	1	3	2	3	1	1	1	0	0	1	0	2	1	0	0	1	1	1
276	4	3	4	2	2	0	6	4	6	0	1	3	4	3	1	0	6	5	6	4	4	1	2	0	1	1	2	1	1	2	1	0	1	0	1	0	0	0	0	0	0	0		0	0	0	0	1	1
277	3	3	6	6	0	5	6	3	5	0	0	1	3	1	0	1	6	0	5	1	4	0	2	1	3	2	3	2	2	3	2	0	2	0	2	1	0	0	0	0	0	0		0	0	1	1	1	1
278	1	1	1	6	0	1	6	1	5	1	0	5	2	1	0	1	6	6	4	1	5	2	1	1	0	0	2	0	1	1	1	0	2	0	1	0	0	0	0	0	0	0		0	1	0	1	1	1
279	3	4	5	5	5	1	4	5	6	4	2	5	2	6	5	1	5	5	5	5	5	0	2	2	1	1	2	1	2	1	1	0	2	0	1	0	0	0	0	0	0	0		1	1	0	0	1	1
280	4	5	6	4	2	1	6	5	2	1	4	2	5	6	2	4	5	5	4	6	4	1	3	1	2	1	3	2	2	1	3	1	1	0	2	1	0	0	0	0	0	0		0	1	0	0	0	1
281	3	3	0	1	1	1	6	1	6	1	1	6		5	0	1	6	6	6	1	3	0	2	0	0	0	2	0	2	0	0	0	3	0	0	1	0	0	0	0	0	0		0	1	0	0	1	1
282	1	1	5	6	0	2	6	0	6	1	1	5	1	4	0	0	5	6	6	1	6	0	1	1	0	1	2	0	1	1	0	3	0	2	0	3	0	0	0	0	0	0		0	0	0	0	0	1
283	0	0	1	6	1	0	6	0	5	0	0	6	1	1	1	0	6	6	6	0	6	1	1	0	0	0	1	0	1	1	0	0	0	1	0	0	0	0	0	0	0	0		0	0	0	0	1
284	4	5	5	6	0	5	6	3	5	0	0	2	0	6	0	2	6	5	5	5	5	1	2	0	0	0	2	1	1	1	1	0	2	0	1	1	0	0	0	0	0	0		0	1	0	1	1	1
285	2	3	1	1	1	0	6	1	5	1	2	6	3	1	2	0	6	6	6	1	5	1	2	0	0	1	1	0	1	1	0	0	3	0	1	0	0	0	0	0	0	0		0	0	0	0	0	1
286	4	5	5	4	2	3	6	3	5	2	0	2	3	5	4	4	5	3	6	5	4	3	2	1	2	0	3	1	2	1	1	0	0	1	0	0	0	0	0	0	0	0		0	1	0	0	1	1
287	2	3	3	5	1	1	5	1	6	0	1	5	1	1	1	2	5	5	5	1	3	0	1	0	0	0	2	1	2	1	0	0	3	0	1	0	0	0	0	0	0	0		0	0	0	0	1	1
288	4	4	3	5	1	3		3	5	0	1	3	3	3	1	1	5	5	5	1	1	1	2	1	3	1	3	1	2	1	3	0	2	1	3	1	0	0	0	0	0	0		0	1	0	0	0	0
289	1	1	0	6	0	1	6	1	3	0	0	6	0	3	1	1	6	3	3	1	1	0	1	0	0	0	1	0	1	1	0	0	2	0	0	0	0	0	0	0	0	0		0	0	0	0	1	1
290	4	3	2	6	1	1	6	1	6	0	1	6	0	3	0	0	6	6	6	1	6	1	1	0	0	0	1	0	2	0	1	0	3	0	1	0	0	0	0	0	0	0		1	0	0	0	0	1
291	1	3	0	6	0	0	6	1	6	1	0	6	0	1	1	0	6	6	6	1	6	2	1	0	1	0	1	1	0	1	1	0	1	0	1	0	0	0	0	0	0	0		0	0	0	0	0	0
292	5	5	5	6	0	5	6	0	6	0	2	6	0	5	0	0	6	6	6	0	6	0	1	0	0	0	0	0	0	0	0	0	0	0	0	0	0	0	0	0	0	0		0	0	0	0	1	1
293	5	4	5	6	1	3	5	2	5	3	5	3	2	5	1	2	4	5	5	5	5	4	2	1	0	1	0	1	2	1	1	0	3	2	0	2	0	1	1	0	0	0	1	0	0	0	0	0	0
294	4	3	3	3	0	3	3	1	1	0	0	1	3	3	0	1	6	6	1	0	2	1	2	1	0	1	1	2	2	1	1	0	3	2	1	2	0	0	0	0	0	0		0	0	0	0	1	1
295	4	5	5	6	5	5	6	4	5	2	4	3	4	5	0	0	5	5	5	5	6	0	2	1	3	1	2	2	2	1	2	1	3	1	2	0	0	0	0	0	0	0		0	1	0	0	1	1
296	6	6	6	6	5	3	6	6	3	0	0	1	5	5	0	0	6	3	3	6	5	1	3	3	3	3	3	2	3	3	3	1	3	3	3	1	0	0	0	0	0	0		0	1	1	0	0	0
297	3	4	5	4	1	5	6	4	3	1	1	3	6	1	0	4	4	5	2	2	4	3	3	1	2	1	3	2	2	2	2	2	1	1	3	3	0	0	0	0	0	0		0	1	0	0	0	0
298	1	2	2	3	1	3	5	1	1	1	0	4	5	5	1	5	1	3	3	1	1	1	2	1	1	2	1	1	2	1	1	0	2	0	1	0	0	1	1	1	0	0	1	0	1	0	0	1	1
299	6	6	6	6	0	6	6	5	5	0	0	0	5	6	0	1	6	6	5	6	3	1	2	1	3	1	2	2	2	1	2	2	2	2	0	2	0	0	0	0	0	0		0	0	0	0	0	1
300	5	5	5	6	4	3	6	5	5	4	6	3	5	5	3	3	6	6	5	5	3	4	3	1	1	1	3	2	2	2	1	0	0	0	1	0	0	1	1	1	1	0	1	0	0	0	0	1	1
301	5	5	6	3	5	5	4	6	2	6	6	3	5	4	6	6	5	5	3	5	3	5	3	2	3	1	2	2	2	2	2	2	2	1	2	1	0	0	0	0	0	0		0	1	0	0	0	0
302	5	6	5	6	5	1	6	5	6	0	5	4	4	4	4	5	4	6	5	3	5	4	1	2	1	1	1	1	2	2	1	1	2	0	1	1	0	1	0	1	1	0	1	0	0	0	0	1	1
303	5	6	5	5	6	5	6	6	6	3	0	1	6	6	6	3	6	5	5	6	5	6	3	2	2	1	3	2	3	0	3	1	3	2	3	3	0	1	0	0	1	0	1	1	1	0	0	1	1
304	0	3	0	6	5	3	6	0	6	0	0	6	3	3	3	3	6	6	6	3	6	6	1	0	2	0	3	1	1	2	1	1	1	0	1	0	1	1	0	0	0	0	2	0	0	0	0	1	1
305	6	3	3	6	0	0	6	3	5	0	1	5	3	5	0	0	6	5	4	3	2	0	2	0	0	0	2	1	2	1	1	0	1	0	1	0	0	0	0	0	0	0		0	0	0	0	0	1
306	3	5	6	5	6	4	6	3	0	4	6	4	6	6	3	3	3	6	2	4	2	6	2	1	1	2	2	2	2	2	2	1	1	1	1	2	0	0	0	0	0	0		0	0	0	0	0	0
307	1	1	3	4	3	3	5	1	3	4	1	5	3	3	3	4	5	5	3	1	3	0	2	1	2	1	2	1	2	1	2	0	1	0	1	1	0	0	0	0	0	0		0	1	0	0	0	1
308	3	4	3	2	3	3	2	4	3	4	3	2	3	3	3	3	3	3	2	4	1	3	3	1	2	1	2	1	1	2	2	0	2	1	2	1	0	1	0	1	1	0	1	0	1	0	0	1	1
309	3	3	5	3	2	4	6	3	4	1	0	3	3	2	0	4	6	4	3	4	3	1	2	1	2	1	3	2	2	2	1	1	2	1	2	1	0	0	0	0	0	0		0	1	0	0	0	1
310	5	6	6	5	5	6	4	6	6	6	6	5	5	4	4	6	5	5	5	5	3	1	3	3	2	2	2	2	2	1	2	1	1	2	1	2	0	1	0	1	1	0	1	1	0	1	1	1	0
311	5	6	6	5	5	6	4	6	6	6	6	5	5	4	4	6	5	5	5	5	3	1	3	3	2	2	2	2	2	1	2	1	1	2	1	2	0	1	0	1	1	0	1	1	0	1	1	1	0
312	0	0	2	6	0	0	0	1	6	0	0	6	1	5	0	0	6	6	5	3	6	0	1	0	0	0	1	0	2	1	0	0	3	0	1	2	0	0	0	0	0	0		0	0	0	0	1	1
313	5	5	1	6	5	1	6	5	5	3	3	2	5	5	1	1	6	6	6	5	4	3	2	1	2	2	2	2	2	2	2	1	3	2	2	0	1	0	0	0	0	0		0	1	1	0	1	1
314	5	6	4	5	3	5	6	5	6	2	2	4	6	4	2	0	6	4	5	4	6	0	3	0	1	1	2	2	1	1	2	0	1	1	0	0	0	0	0	0	0	0		0	0	0	0	0	0
315	6	6	1	6	3	5	6	1	6	0	0	5	0	5	0	0	6	5	6	2	1	0	3	2	1	1	2	1	1	2	3	0	2	0	1	0	0	0	0	0	0	0		1	0	0	1	0	0
316	3	3	3	6	2	1	6	1	5	0	1	5	1	3	1	1	6	6	3	1	1	1	2	1	1	1	1	0	2	1	1	1	3	1	1	3	0	0	0	0	0	0		0	0	0	0	0	1
317	5	5	6	6	5	6	6	6	0	6	6	3	6	6	6	6	5	5	3	6	6	6	2	2	0	1	3	2	3	2	2	3	2	2	1	0	0	0	0	0	0	0		0	0	0	0	0	0
318	1	1	2	6	0	0	6	1	6	0	0	6	0	0	0	1	6	6	6	1	6	0	1	0	0	0	0	0	1	1	0	0	1	0	0	0	0	0	0	0	0	0		0	0	0	0	1	1
319	0	1	1	6	1	1	6	1	6	6	6	6	0	0	0	0	6	6	6	1		6	2	0	0	0	3	0	3	0	0	0	3	0	1	0	0	0	0	0	0	0		0	0	0	0	0	1
320	5	5	5	5	3	5		3	3	5	0	0	3	6	5	5	3	1	3	5	5	3	2	2	3	2	3	2	2	2	3	2	3	2	2	1	0	0	0	0	0	0		0	0	0	0	0	0
321	5	3	4	3	5	3	5	6	6	2	1	3	5	5	0	5	5	5	4	4	5	4	2	1	3	2	3	1	1	1	3	1	1	2	1	0	0	0	0	0	0	0		0	1	1	1	1	1
322	6	6	6	5	6	6		6	0	6	6	0	6	6	5	6	6	6	6	6	6	6	3	3	3	3	3	3	3	0	3	3	3	3	3	3	1	1	0	0	1	1	2	0	1	0	0	0	0
323	6	6	5	6	4	2	6	5	5	3	3	2	4	6	2	2	6	6	5	6	5	6	1	2	1	1		1	2	1	1	1	3	2	2	2	0	0	0	0	0	0		0	0	0	0	0	1
324	3	3	3	6	0	0	5	3	6	0	0	5	2	3	0	1	6	6	6	3	6	1	2	2	3	1	1	1	2	1	1	0	3	2	1	3	0	0	0	0	0	0		0	0	0	1	0	1
325	5	4	5		0								5		0																						0	0	0	0	0	0		0		0	0
326	0	1	2	6	0	0	6	1	5	5	5	5	0	1	1	0	6	1	5	0	5	0	1	0	0	0	1	0	1	1	0	1	2	0	1	0	0	0	0	0	0	0		0	0	0	0	1	1
327	1	1	2	6	2	1	6		5	1	2		2	1	0	2	5	5	5	1	5	3	1	1	1	1	2	1	1	1	1	1	1	1	1	0	0	0	0	0	0	0		0	0	0	0	1	1
328	1	3	0	0	0	1	6	0	6	3	3	6	0	0	0	1	5	3	6	0	4	5	1	0	1	0	1	0	1	1	0	0	3	0	1	0	0	0	0	0	0	0		0	0	0	0	0	1
329	4	5	4	5	2	5	6	5	4	1	0	1	6	5	0	3	6	5	4	4	4	0	2	1	2	2	2	2	2	2	2	1	3	2	2	2	1	0	0	0	0	0		0	0	1	0	1	1
330	5	5	6	5	3	3	6	5	5	3	5	4	5	3	5	3	6	6	6	5	5	1	2	1	1	1	2	1	2	1	1	1	2	1	1	2	0	0	0	0	0	0		0	0	0	0	1	1
331	1	3	1	5	1	0	6	1	6	0	1	5	1	1	4	0	6	1	3	1	5	3	1	0	3	1	2	1	1	1	1	1	2	0	1	0	0	0	0	0	0	0		1	0	0	0	0	0
332	4	3	3	3	0	1	6	1	6	0	2	6	3		0	1	6	6	6	0	6	1	1	0	0	0	0	0	2	0	1	0	3	0	1	1	0	0	0	0	0	0		0	0	0	0	1	0
333	1	5	1	6	4	5	6	1	6	5	5	5	6	6	3	3	6	6	6	1	3	2	2	1	0	0	3	1	2	1	1	1	1	0	0	0	0	0	0	0	0	0		0	0	0	0	1	1
334	5	5	5	3	1	0	5	3	1	1	1	3	5	6	1	1	3	3		3	3	1	1	3	0	1	1	0	1	0	0	0	1	2	0	1	0	0	0	0	0	0		0	0	0	0	0	1
335	3	5	4	6	5	3	6	3	5	0	1	5	3	3	3	2	5	6	4	1	5	3	1	1	0	0	1	1	1	1	0	0	2	1	0	0	0	0	0	0	0	0		0	0	0	0	1	1
336	1	1	1	3	0	0	6	3	5	0	0	3	0	0	0	0	6	6	5	1	6	0	1	0	1	0	2	0	1	1	1	0	0	0	0	0	0	0	0	0	0	0		0	0	0	0	1	1
337	3	3	4	6	4	5	4	5	2	6	5	1	6	6	5	5	3	3	0	6	3	4	2	1	3	1	3	2	2	3	3	2	1	2	2	1	0	0	0	0	0	0		0	0	0	1	1	1
338	3	1	3	4	0	3	5	3	3	0	3	3	0	1	0	0	5	5	3	1	1	0	1	0	0	0	2	1	2	1	1	1	1	0	0	1	0	0	0	0	0	0		0	0	0	0	0	1
339	5	6	6	5	5	6	6	6	6	2	3	3	6	6	4	4	6	5	5	6	4	3	2	1	3	1	3	1	2	2	3	0	3	0	3	0	1	0	0	0	0	0		0	0	1	1	1	1
340	6	6	6	2	6	6	2	6	0	6	6	0	6	6	6	6	2	0	0	6	0	6	2	3	3	3	3	0	3	1	3	3	2	3	2	3	0	0	0	0	0	0		1	0	0	0	0	0
341	6	6	6	6	3	3	6	6	6	0	1	1	3	6	1	4	5	6	6	6	3	6	3	3	2	3	3	3	2	2	0	0	3	3	0	3	0	0	0	0	0	0		0	1	0	0	0	0
342	6	6	6	6	3	3	6	6	6	0	1	1	3	6	1	4	5	6	6	6	3	6	3	3	2	3	3	3	2	2	0	0	3	3	0	3	0	0	0	0	0	0		0	1	0	0	0	0
343	6	6	6	6	3	3	6	6	6	0	1	1	3	6	1	4	5	6	6	6	3	6	3	3	2	3	3	3	2	2	0	0	3	3	0	3	0	0	0	0	0	0		0	1	0	0	0	0
344	5	5	5	5	5	4	4	5	4	5	5	4	6	6	5	4	4	4	5	5	3	0	3	3	0	2	0	1	0	1	1	0	2	0	0	0	0	1	0	0	1	0	2	0	0	0	0	0	1
345	1	0	0	6	1	6	5	1	6	6	6	6	1	3	0	2	6	6	6	2	5	5	1	0	1	0	3	1	3	1	1	0	2	2	2	1	0	1	0	0	0	1	1	0	1	0	0	0	0
346	4	4	3	6	0	1	6	2	5	0	3	5	5	6	0	1	6	6	6	1	5	1	2	1	1	1	2	1	2	1	1	1	2	1	1	1	0	1	0	1	0	0	1	0	0	0	0	0	1
347	0	0	0	0	0	0	6	0	5	0	5	6	0	0	1	0	6	5	5	0	6	1	0	0	0	0	0	0	0	0	0	0	0	0	0	0	0	0	0	0	0	0		0	0	0	0	0	0
348	3	5	5	4	5	6	5	5	4	5	5	2	6	6	5	5	4	4	3	5	1	4	2	1	2	2	3	2	3	2	2	1	3	3	2	1	0	1	0	0	1	1	1	1	0	0	0	0	1
349	5	6	6	6	5	4	6	5	0	6	2	4	5		1	4	6	6	6	4	6	5	3	2	3	2	3	2	2	1	3	0	1	1	2	0	0	0	0	0	0	0		0	1	0	0	0	0
350	5	6	6	6	5	4	6	5	0	6	2	4	5		1	4	6	6	6	4	6	5	3	2	3	2	3	2	2	1	3	0	1	1	2	0	0	0	0	0	0	0		0	1	0	0	0	0
351	5	6	6	6	5	4	6	5	0	6	2	4	5		1	4	6	6	6	4	6	5	3	2	3	2	3	2	2	1	3	0	1	1	2	0	0	0	0	0	0	0		0	1	0	0	0	0
352	3	1	1	6	3	3	6	1	5	0	1	5	3	2	3	3	6	5	3	1	3	4	2	1	2	1	2	1	1	1	1	1	2	0	0	0	0	0	0	0	0	0		0	1	0	0	1	1
353	3	3	3	6	3	5	5	3	5	1	1	5	3	3	1	1	5	5	5	1	5	0	1	0	0	0	1	1	2		1	0	3	1	0	1	0	1	0	1	1	0	1	0	0	0	0	1	1
354	1	3	3	3	3	3	2	3	4	1	1	1	1	0	1	0	4	5	5	1	2	1	2	1	1	1	2	1	2	1	1	1	1	1	0	1	1	1	0	0	1	0	2	0	1	0	0	0	0
355	1	5	3	6	1	0	6	1	6	0	0	6	1	1	0	1	6	6	6	1	6	5	1	0	1	0	1	0	1	1	0	0	0	0	1	0	0	0	0	0	0	0		0	1	0	0	1	1
356	1	5		6	0	1	6	1	6	0	0	5	5	6	0	0	6	6	5	1	6	0	1	1	1	0		0	2	1	1	1	2	1	0	0	0	0	0	0	0	0		0	0	0	0	1	1
357	4	3	3	4	5	4	6	3	5	5	1	3	6	5	5	3	6	5	3	3	3	1	2	3	1	1	1	1	2	1	1	0	1	2	0	0	0	0	0	0	0	0		0	0	0	0	1	1
358	0	0	0	6	0	1	6	0	6	0	0	6	1	1	0	0	6	6	6	0	6		1	0	0	0	1	0	1	0	0	0	0	0	0	1	0	0	0	0	0	0		0	0	0	0	0	0
359	5	6	3	6	6	5	6	4	5	0	0	6	0	6	0	0	6	6	5	5	6	1	2	0	0	2	3	1	2	0	0	0	2	0	0	1	0	0	0	0	0	0		0	1	0	0	0	1
360	1	5	3	6	0	6	6	1	3	0	0	3	2	5	0	3	5	5	4	2	3	1	2	0	1	0	3	2	1	1	1	0	0	1	1	1	0	0	0	0	0	0		0	1	0	0	1	1
361	1	4	1	6	1	1	6	1	6	3	1	6	1	1	1	1	6	6	5	1	5	1	1	0	1	1	1	1		1	1	0	2	1	1	0	0	0	0	0	0	0		0	0	0	1		1
362	6	5	6	6	4	3	6	5	6	0	5	3	4	6	3	4	6	6	5	6	5	6	3	1	3	2	3	1	3	1	3	1	2	1	3	2	0	1	0	1	0	1	1	0	0	0	0	0	0
363	1	3	4	5	5	1	6	2	5	0	0	3	5	3	5	0	6	6	6	1	3	3	1	1	1	1	2	0	2	2	1	1	2	0	0	0	0	1	0	0	1	0	1	0	0	0	0	0	0
364	3	3	3	3	1	1	6	3	5	3	3	3	6	6	3	0	6	5	5	3	5	6	2	1	2	1	3	2	2	1	1	2	1	1	1	3	0	0	0	0	0	0		0	0	0	0	1	0
365	3	3	3	4	4	4	3	3	2	0	1	2	0	2	2	3	4	4	3	2	2	0	2	3	2	2	2	2	1	1	2	0	2	1	1	2	0	1	0	0	1	0	1	1	0	0	0	0	1
366	5	6	4	5	3	2	6	1	6	0	4	6	0	4	5	0	6	6	6	3	6	4	1	1	1	1	3	2	2	0	1	1	1	2	1	2	0	0	0	0	0	0		0	1	0	1	1	0
367	4	5	6	6	0	0	6	2	5	0	0	3	3	1	0	0	6	6	6	1	5	0	1	0	0	0	2	1	3	1	0	0	3	1	1	1	0	0	0	0	0	0		0	0	0	0	0	1
368	3	3	5	6	3	1	6	2	6	1	3	4	1	4	0	2	6	6	6	3	5	3	1	0	0	0	1	1	1	1	1	0	1	0	1	0	0	0	0	0	0	0		0	0	0	0	1	1
369	3	3	4	6	5	5	5	4	4	4	5	4	4	5	5	2	3	3	3	2	3	3	2	1	1	1	3	1	2	1	1	1	2	1	1	1	0	0	0	0	0	0		1	0	0	0	1	1
370	0	1	0	5	1	1	6	0	5	1	2	6	0	1	0	1	6	6	5	1	5	1	0	0	0	0	1	0	1	1	0	0	3	0	0	0	0	0	0	0	0	0		0	0	0	0	1	1
371	3	6	1	6	3	1	6	2	6	2	2	5	1	2	1	0	6	6	6	1		3	2	0	2	0	3	0	1	1	3	1	2	0	2	0	0	1	0	0	1	0	1	0	0	0	0	0	1
372	3	2	1	5	5	1	6	1	5	3	5	3	3	6	5	1	5	5	5	0	4	0	1	0	1	0	2	1	1	1	2	1	2	1	1	0	0	1	0	1	0	0	1	0	1	0	0	1	1
373	5	6	6	6	0	1	6	4	6	5	0	1	6	2	0	3	5	6	4	2	1	5	3	1	1	1	1	1	1	2	0	0	1	0	1	0	0	0	0	0	0	0		0	1	0	0	1	1
374	1	3	6	6	0	0	0	1	5	0	0	5	0	6	0	0	6	6	6	1	6	0	1	0	0	0	2	1	2	0	1	0	3	0	0	0	0	0	0	0	0	0		0	0	0	0	0	1
375	6	6	6	5	6	6	5	5	5	6	6	1	6	6	6	6	5	5	3	6	3	0	3	2	3	1	3	2	2	3	3	3	2	2	3	1	0	0	0	0	0	0		1	0	0	0	0	1
376	6	6	3	6	0	6	6	6	3	3	6	6	0	6	0	0	6	6	6	6	6	6	2	0	1	1	3	0	1	1	2	3	3	3	1	0	0	0	0	0	0	0		0	0	0	0	1	1
377	6	6	3	6	0	6	4	6	3	3	6	6	0	6	0	0	6	6	6	6	6	6	2	0	1	1	3	0	1	1	2	3	3	3	1	0	0	0	0	0	0	0		0	0	0	0	1	1
378	5	4	4	5	0	1	6	3	3	0	0	3	4	5	0	0	6	5	5	3	5	0	2	1	0	1	1	1	2	1	1	0	2	1	0	1	0	0	0	0	0	0		0	0	0	0	1	1
379	6	5	6	5	1	6	6	6	6	0	5	4	6	4	0	5	6	6	4	6	4	0	3	2	3	2	3	2	2	2	3	2	1	2	3	1	0	0	0	0	0	0		0	0	0	1	1	0
380	1	2	1	6	3	2	6	1	6	0	0	5	1	3	0	2	6	6	5	1	5	3	1	0	0	0	2	0	1	1	1	0	1	0	1	0	0	1	1	0	0	0	1	0	1	0	1	1	1
381	0	3	1	5	3	0	6	1	5	0	0	6	5	4	0	0	5	5	3	1	3	5	1	0	1	0	0	0	2	0	0	0	1	0	0	0	0	0	0	0	0	0		0	0	0	0		1
382	5	5	5	5	3	2	5	4	0	0	0	3	3	3	0	2	5	5	3	5	6	0	2	2	2	1	3	1	2	2	2	2	3	0	2	1	1	1	0	0	1	0	2	0	0	0	0		1
383	1	5	5	6	1	3	6	3	5	1	6	5	5	5	4	4	4	4	4	3	3	6	2	0	1	1	3	2	2	2	1	2	1	1	2	0	0	0	0	0	0	0		0	0	0	0	0	1
384	5	5	0	6	1	3	6	3	3	6	5		6	6	3	6	5	3	1	3	3	2	2	1	0	2	2	1	2	0	0	1	2	2	1	0	0	0	0	0	0	0		0	0	0	0	0	1
385	1	3	3	3	3	0	6	1	6	0	1	5	1	1	1	1	5	4	5	0	5	5	1	0	0	0	0	1	1	1	0	0	0	0	0	0	0	0	0	0	0	0		0	0	0	0	0	1
386	3	3	3	3	3	1	2	3	2	2	4	1	4	4	3	1	5	3	3	3	3	1	2	1	3	2	3	2	2	2	2	1	2	2	1	1	0	1	0	0	1	1	1	0	0	0	0	0	0
387	4	6	6	6	6	6	6	1	5	3	3	5	6	6	0	6	6	6	6	3	6	1	1	0	1	0	2	0	1	1	2	0	1	0	1	0	0	0	0	0	0	0		0	0	0	0	1	1
388	0	1	1	0	6	6	6	0	6	0	0	5	1	0	6	0	6	6	6	0	6	6	1	0	0	0	0	0	0	0	0	0	0	0	0	0	0	0	0	0	0	0		0	0	0	0	1	0
389	2	3	4	4	1	3	6	2	5	1	4	5	3	4	2	4	5	4	4	3	4	1	1	2	1	1	2	2	2	1	1	1	1	1	0	1	0	0	0	0	0	0		0	1	0	0	1	1
390	1	1	2	6	2	4	6	1	5	0		5	3	1	1	4	5	3	1	1	5	0	1	1	3	2	2	1	2	1	2	0	1	0	2	0	1	1	1	0	1	0	2	0	0	1	1	1	1
391	4	3	2	6	0	0	6	2	6	0	3	5	1	3	0	0	6	6	6	5	3	2	3	1	2	1	3	1	3	2	2	2	2	1	2	0	0	0	0	0	0	0		0	0	0	0	1	1
392	5	6	6	5	5	5	5	3	3	5	5	0	6	6	5	6	6	4	3	4	3	2	2	2	1	2	3	2	1	2	1	1	1	2	2	1	0	0	0	0	0	0		0	0	0	0	0	1
393	4	6	6	3	1	2	6	2	6	2	2	3	4	6	0	0	6	6	6	5	6	6	2	1	3	1	3	1	2	3	3	0	0	3	2	0	0	1	0	0	1	0	2	0	0	0	0	0	0
394	2	4	4	5	5	5	4	1	3	2	3	2	6	5	3	3	4	4	2	1	3	4	2	1	3	0	2	1	2	2	2	0	1	1	2	0	0	0	0	0	0	0		0	1	1	1	1	1
395	0	1	3	6	0	2	6	0	6	0	5	6	1	0	0	0	5	6	5	0	6	0	1	0	0	0	1	1	1	2	0	0	2	0	0	0	0	0	0	0	0	0		0	0	0	1	1	1
396	4	4	5	5	5	3	0	5	0	6	6	0	6	6	5	6	5	0	1	2	0	1	3	1	2	2	3	2	3	2	2	0	3	1	2	1	1	1	0	0	1	1	2	0	0	0	1	1	0
397	3	6	6	6	5	5	5	4		3	3	4	4	5		4	6	6	6	5	5	0	2	1	1	0	3	1	2	1	0	1	1	1	2	1	0	0	0	0	0	0		0	0	0	0	0	1
398	5	6	6	6	2	4	5	3	1	2	3	1	5	6	3	5	6	6	6	4	6	2	3	2	3	3	3	2	3	3	3	0	3	1	3	2	1	1	0	0	1	0	1	0	0	0		0	0
399	3	3	4	3	3	3	6	3	5	0	2	3	3	3	5	5	5	3	4	3	3	0	2	1	2	0	2	2	1	2	1	0	2	0	1	0	0	0	0	0	0	0		0	0	0	0	0	0
400	5	4	3	5	4	4	5	5	5	1	3	1	3	4	0	4	4	5	6	5	2	3	2	0	1	1	3	1	1	1	1	0	0	0	1	1	0	0	0	0	0	0		0	1	0	0	0	1
401	3	3	3	6	0	2	3	0	3	2	1	0	1	1	0	1	4	6	5	1	2	1	2	1	1	2	2	2	2	2	3	1	1	2	2	1	0	1	0	0	1	0	2	0	0	0	1	1	1
402	5	5	5	3	3	1	6	6	6	0	0	0	6	6	0	5	5	5	5	6	6	5	2	3	3	2	3	2	2	0		1	3	3	3	3	0	0	0	0	0	0		0	0	0	0	0	0
403	0	3	4	4	2	3	3	3	2	3	2	1	3	2	1	0	1	2	2	4	1	0	2	1	1	1	2	1	2	2	1	1	1	2	2	2	0	1	0	0	1	0	2	0	0	1	0	0	0
404	3	4	5	6	0	3	6	3	6	1						5	5	6	6	4	5	5	3	2	3	2	3	2	3	1	3	2	3	3	2	1	0	0	0	0	0	0		1	1	0	0	1	0
405	2	3	3	3	2	1	2	1	2	2	1	3	2	2	1	1	3	2	3	1	1	3	1	1	2	0	2	1	1	1	1	1	2	1	1	0	0	0	0	0	0	0		0	0	0	0	0	0
406	1	1	2	5	1	2	6	1	5	0	2	5	1	2	0	1	5	4	2	1	5	2	1	0	0	0	2	1	1	1	1	0	1	1	1	0	0	0	0	0	0	0		0	0	1	0	1	1
407	6	6	6	5	3	6	5		5	0	0	0	5	6	2	5	4	4	5	6	0	1	3	3	2	2	2	2	2	1	1	0	0	2	1	1	1	1	0	1	1	0	2	0	0	1	1	0	1
408	0	1	0	6	0	0	6	1	6	2	1	6	0	0	0	0	0	6	6	0	6	0	2	0	0	0	2	0	0	1	0	0	2	0	0	0	0	0	0	0	0	0		0	1	0	0	1	1
409	0	4	4	5	5	5	5	5	4	6	6	3	5	3	5	3	4	3	4	4	5	0	1	1	0	2	1	2	2	2	0	1	2	2	0	3	0	0	0	0	0	0		0	1	0	0	0	1
410	1	3	3	6	3	3	6	1	3	1	0	3	5	3	3	2	5	5	3		3	1	3	1	0	1	2	1	1	2	1	0	2	1	0	1	0	1	0	1	1	0	1	0	0	0	0	1	1
411	3	1	1	6	0	3	6	1	5	0	3	4	0	1	0	0	5	5	5	1	5	1	2	0	1	1	2	1	2	1	1	0	2	0	2	1	1	1	0	0	1	0	2	0	0	0	0	0	1
412	1	2	4	6	0	1	6	2	5	0	0	4	3	1	0	0	6	5	5	4	5	1	2	0	2	0	3	1	2	1	2	0	2	0	1	0	0	0	0	0	0	0		1	0	0	0	0	1
413	3	3	1	4	0	0		5	4	0	6		2	6	0	1	1	6		4	4	2	1	3	0	2	3	1	3	1	1	0	3	2	3	0	1	1	0	0	1	0	2	0	1	1	1	1	0
414	1	2	0	6	5	0	5	0	6	5	2	6	2	2	2	3	5	4	6	0	5	5	1	0	0	0	0	0	0	1	1	0	2	0	0	0	0	0	0	0	0	0		0	1	0	0	0	1
415	6	6	4	5	1	1	6	6	6	6	6	6	6	6	5	6	6	6	6	6	6	3	2	3	1	2	2	2	2	2	2	3	1	0	2	1	0	1	1	1	1	1	1	1	0	0	0	0	0
416	5	5	5	6	3	3	5	5	3	3	1	1	5	1	0	3	6	5	5	5	6	3	3	1	2	1	2	2	3	2	2	1	1	1	2	1	0	1	0	1	0	0	1	0	0	0	0	0	0
417	6	5	6		5	6	6	5	6	5	5	4		3	3	0	6	5	5	6	4	0	2	1	0	1	1	1	1	1	3	0	2	1	1	1	0	0	0	0	0	0		0	1	0	1	0	1
418	5	5	5	5	3	3	5	5	4	2	0	4	5	3	3	0	0	0	3	5	0	0	2	1	2	2	2	1	1	2	2	2	1	2	2	0	0	1	0	1	1	0	1	0	0	0	0	1	1
419	0	1	1	6	0	0	6	0	6	0	1	6	3	3	0	1	6	6	6	0	6	1	1	0	0	0	0	0	0	0	0	0	2	0	0	0	0	0	0	0	0	0		0	0	0	0	0	1
420	3						6		3					6			6		5		5		1	0	0	0	1	0	1	1	1	0	0	0	2	0	0	0	0	0	0	0		0	0	0	1	1	1
421	5	6	6	5	5	6	6	6	5	0	0	3	6	0	3	3	5	5	5	5	1	0	3	1	3	1	3	2	2	2	3	1	1	2	2	0	1	1	0	0	1	0	2	0	0	1	0	1	1
422	2	3	3	6	3	1	6	1	5	1	3	5	3	3	3	2	5	5	4	1	5	1	1	0	0	1	1	1	1	1	0	0	0	0	1	0	0	0	0	0	0	0		0	0	0	0	1	1
423	5	5	5	6	1	5	6	5	1	0	0	1	6	5	0	1	6	5	1	5	5	5	3	3	2	2	3	2	1	3	1	1	1	2	1	0	0	0	0	0	0	0		0	0	0	0		1
424	1	3	3	6	4	1	6	1	6	1	1	6	6	0	5	0	5	6	5	0	6	3	2	0	2	1	1	1	1	1	1	0	0	0	1	0	0	0	0	0	0	0		0	0	1	1	1	1
425	1	1	1	6	1	0	6	0	6	1	1	6	5	1	1	1	6	6	6	1	3	0	1	0	0	1	1	0	1	1	1	0	0	0	0	0	0	0	0	0	0	0		0	0	0	0	1	1
426	1	1	1	6	5	1	6	1	6	1	1	5	1	0	0	0	6	6	5	1	1	1	2	1	2	1	2	2	1	1	1	0	1	2	2	0	0	1	1	0	0	0	1	0	0	0	0	1	1
427	0	3	6	6	0	0	6	1		0	0	5	1	5	0	1	6	0	6	1	6	0	1	0	0	0	2	0	1	1	1			1	2	1			0	0	0	0			0	0	0	0	0
428	1	1	1	6	0	0	6	0	4	0	0	6	0	1		0	6	6	6	0		0	1	0	0	0	1	0	1	1	0	0	0	0	0		0	0	0	0	0	0		0	0	0	0	1	1
429	6	6	6	6	5	6	5	6	5	0	0	0	0	6	0	4	6	6	6	6	6	0	3	1	2	2	3	2	3	2	2	1	3	2	2	3	1	1	0	0	1	0	2	0		0	1		1
430	1	3	2	6	4	3	6	0	3	0	3	3	6	5	3	0	5	3	4	3	3	0	3	2	2	1	3	2	1	1	1	1	2	1	0	2	0	0	0	0	0	0		1	0	0	0	1	0
431	5	6	5	5	3	1	5	5	3	1	1	1	1	5	1	1	6	5	6	5	3	0	3	2	3	1	3	1	2	2	3	1	1	2	2	2	0	0	0	0	0	0		0	1	0	0	0	0
432	1	1	1	1	1	1	4	1	3	2	3	5	2	2	2	1	4	4	1	1	3	1	1	0	1	0	0	0	1	1	1	0	2	0	0	0	0	0	0	0	0	0		0	0	0	0	1	1
433	6	6	4	4	5	6	2	4	1	3	5	1	6	5	5	6	1	4	2	5	2	3	2	2	2	1	3	2	1	0	1	1	1	2	1	2	0	0	0	0	0	0		0	0	0	0	0	0
434	1	3	4	3	3	0	6	1	6	0	0	3	0	5	0	3	6	6	3	3	3	1	1	0	0	0	3	1	2	1	1	0	0	0	1	2	0	1	1	1	1	0	2	0	1	0	0	1	0
435	5	5	6	6	0	4	6	3	3	0	5	0	1	6	0	1	5	6	5	5	4	0	3	2	3	1	2	1	2	2	3	1	2	1	2	1	0	0	0	0	0	0		0	0	0	1	1	1
436	0	0	1	0	0	0	6	0	6	1	1	6	1	1	1	1	6	6	5	0	6	0	0	0	0	0	0	0	0	1	0	0	0	0	0	0	0	0	0	0	0	0		0	0	0	0	0	1
437		1	1		0		1	0	5	0	0	6	0	1	0	1	6	5	6	1	6	0	1	1	0	0	1	0	1	0	0	0	3	1	0	0	0	0	0	0	0	0		0	0	0	0	0	1
438	2	2	5	6	6	5	5	5	1	4	5	5	6	6	5	5	6	6	6	5	4	3	2	1	1	1	2	2	2	2	2	1	1	2	1	1	0	0	0	0	0	0		0	0	0	0	0	0
440	1	3	4	6	0	0	5	2	6	6	5	4	3	3	3	3	6	6	5	4	6	0	2	3	3	2	3	2	2	2	2	1	2	1	2	2	1	1	0	0	1	0	2	0	0	0	0	1	1
441	5	6	1	6	0	6	6	1	1	1	0	6	0	1	0	0	1	6			1	5	2	0	2	0	2	1	0	1	1	1			2	3	0	0	0	0	0	0		0	1	0	1	1	1
442	6	6	6	5	5	6	5	6	5	6	6	0	6	6	6	6	5	5	5	6	0	3	3	3	3	2	3	2	3	2	3	2	3	2	3	3	0	0	0	0	0	0		0	0	0	0	0	1
443	1	1	3	6	0	1	6	0	6	0	0	6	0	1	0	5	5	6	6	0	6	0	2	1	2	1	2	1	1	2	2	0	0	1	1	0	1	0	0	0	0	0		0	0	0	0	1	1
444	6	3	3	6	2	0	6	3	2	0	4	3	5	5	0	1	6	6	4		5	3	3	1	3	2	3	2	1	2	1	0	0	1	0	0	0	1	1	1	0	0	1	0	0	0	0		1
445	6	3	3	6	2	0	6	3	2	0	4	3	5	5	0	1	6	6	4		5	3	3	1	3	2	3	2	1	2	1	0	0	1	0	0	0	1	1	1	0	0	1	0	0	0	0		1
446	1	3	1	2	0	3	6	1	3	3	6	4	5	5	1	2	6	3	3	3	3	2	1	1	0	2	3	2	2	1	1	1	0	2	0	2	0	0	0	0	0	0		0	0	0	0	0	1
447	3	2	3	6	1	1	6	1	6	0	0	5	3	5	1	1	6	6	6	1	6	1	1	1	1	2	2	1		1	1	1	1	1	1	0	0	1	0	1	1	0	1	0	0	0	0	0	0
448	5	5	1	6	0	1	6	5	4	0	0	5	3	6	0	2	5	4	5	5	3	5	2	1	0	2	3	1	3	1	2	2	3	1	2	2	0	0	0	0	0	0		0	0	0	0	0	1
449	1	1	1	6	1	1	6	0	6	0	0	6	1	1	1	1	6	6	6	0	6	1	1	0	0	0	1	0	1	1	1	0	0	0	1	0	0	0	0	0	0	0		0	0	0	0		1
451	5	6	6	6	3	3	5	4	4	3	0	0	4	4	3	3	5	5	2	3	2	1	3	1	0	1	2	2	2	1	1	0	3		0	1	1	1	1	1	1	1	2	0	0	0	0	1	1
452	1	1	0	1	0	1	5	1	5	0	1	6	0	0	1			1	4	0	3	1	1	0	0	0	0	0	1	1	1	0	3	0	0	0	0		0	0	0	0		0	0	0	0	1	1
453	4	4	5	6	5	5	6	1	6	0	0	5	3	1	0	5	6	6	5	1	2	0	1	1	1	2	2	2	1	1	1	1	1	2	0	0	0	0	0	0	0	0		0	1	0	0	0	0
454	5	6	5	5	5	5	5	5	5	5	0	5	5	5	5	3	6	5	5	4	5	0	2	1	1	1	2	2	2	2	1	1	2	1	2	1	0	0	0	0	0	0		1	0	0	0	1	1
455	1	3	1		5	3	5		5	1	0	5	1	3	1	0	5	5	6	0		0	1	0	0	1	1	1	2	0	0	0	0	2	0	0	0	0	0	0	0	0		0	0	0	0	1	1
456	5	6	5	6	6	6	6	6	6	5	6	3	0	5	0	5	5	1	6	6	5	6	3	1	3	1	3	2	2	2	3	2	3	2	3	3	0	0	0	0	0	0		0	1	0	0	1	1
457	5	6	5	6	6	6	6	6	6	5	6	3	0	5	0	5	5	1	6	6	5	6	3	1	3	1	3	2	2	2	3	2	3	2	3	3	0	0	0	0	0	0		0	1	0	0	1	1
458	1	3	4	5	4	3	6	3	5	1	0	5		3	1	3	6	6	5	3	3	3	1	1	2	1	3	1	2	2	2	1	2	1	2	1	0	1	1	1	0	0	1	0	1	0	0	0	0
459	4	4	4	6	4	4	6	4	0	3	4	3	6	5	4	5	4	2	2	3	4	1	3	2	3	3	3	2	2	2	1	0	2	1	1	2	0	0	0	0	0	0		0	1	0	0	1	1
460	2	3	1	5	4	1	6	1	5	0	1	6	1	1	1	1	6	6	3	1	6	3	3	0	0	0	2	0	0	1	1	0	3	0	1	3	0	0	0	0	0	0		0	0	0	0	1	1
461	0	5	5	6	0	0	6	2	6	0	0	5	5	5	0	2	6	6	5	2	0	0	3	1	0	0	3	1	3	1	1	0	3	1	0	2	0	1	0	1	1	0	1	1	0	0	0	0	1
462	6	6	6	6	1	6		6	5	0	6	6	6	6	3	6	6	6	6	6	5	6	3	0	3	1	3	1	2	3	3	1	3	1	3	2	0	0	0	0	0	0		0	1	0	0	1	1
463	4	6	5	6	1	4	6	2	6	1	1	4	1	2	0	0	6	6	6	1	5	0	1	1	0	1	1	1	2	0	0	0	3	0	0	1	0	0	0	0	0	0		0	0	0	0	0	1
464	1	3	3	3	1	5	5	0	3	0	0	5	3	2	3	1	5	3	3	0	4	1	1	0	0	0	1	0	1	1	0	0	2	0	0	0	0	0	0	0	0	0		0	0	0	1	1	1
465	3	2	4	6	0	5	6	4	6	0	0	3	0	0	0	2	6	6	6	4	5	1	2	2	2	0	2	1	1	2	3	1	2	0	2	0	1	1	1	1	0	0	2	0	0	1	0	1	1
466	5	5	6	6	3	1	6	5	5	1	1	1	6	6	1	3	6	6	3	6	2	2	3	1	2	2	3	2	3	2		3	3	1	1	2	1	0	0	0	0	0		0	0	1	0	0	0
467	6	5	5	6	3	3	6	5	5	5	2	2	3	6	4	4	6	5	5	5	5	5	1	1	1	1	2	1	2	1	1	1	3	1	1	2	0	1	0	0	1	0	1		0	0	0	0	0
468	6	6	6	3	3	3	3	5	1	4	3	4	1	4	3	4	3	3	5	4	3	0	3	1	2	2	3	2	3	2	3	1	3	1	2	1	0	0	0	0	0	0		0	1	0			1
469	3	6	6	6	3	5	6	4	6	6	1	1	6	6	6	5	6	6	6	6	6	6	3	3	0	2	3	1	2	0	2	0	0	3	0	0	0	0	0	0	0	0		0	0	0	0	1	1
470	1	5	1	5	5	4	5	3	3	1	2	5	1	4	4	4	5	5	2	1	5	0	2	1	0	0	2	0	1	1	1	0	2	1	0	0	0	0	0	0	0	0		0	0	0	0	1	1
471	3	1	0	2	1	2	6	1	5	2	2	4	2	2	1	2	5	6	5	0	4	0	1	0	0	0	1	0	0	1	1	0	1	0	1	0	0	0	0	0	0	0		0	0	0	0	0	1
472	3	3	3	6	1	1	6	3	5	0	0	3	3	4	0	0	5	5	5	1	3	1	1	0	0	0	2	1	1	1	1	1	1	1	1	0	0	0	0	0	0	0		0	0	0	0	1	1
473	1	1	0	3	2	0	6	1	5	4	3	6	0	0	0	0	6	5	5	0	6	2	1	0	0	0	1	0	2	0	0	0	2	0	1	2	0	0	0	0	0	0		0	0	0	0	0	1
474	5	5	6	3	6	6	5		6	5	6	3	6	6	4	3	6	5	5	5	5	4	2	3	3	2	3	2	2	2	2	1	2	2	2	1	0	0	0	0	0	0		0		0	1	0	1
475		4	4	5	6	5	5	3	3	4	5	3	3	3	3	3	5	5	2	4	2	1	3	2	0	2	3		2	3	2	1	2	2	3	1	0	1	1	1	0	0	1	0	0	0	0	1	0
476	5	5	4	6	5	6	5	6	5	6	6	0	6	6	6	6	4	5	5	6	5	4	2	3	3	2	3	2	3	3	3	1	1	2	2	1	1	1	0	0	1	0	2	0	0	1	0	0	1
477	5	6	6	6	0	4	6	6	5	3	5	0	6	6	0	3	6	6	6	6	5	0	3	3	1	3	3	3	3	2	0	0	3	3	0	2	0	0	0	0	0	0		0	0	0	0	1	1
478	5	6	6	6	0	4	6	6	5	3	5	0	6	6	0	3	6	6	6	6	5	0	3	3	1	3	3	3	3	2	0	0	3	3	0	2	0	0	0	0	0	0		0	0	0	0	1	1
479	5	6	6	6	0	4	6	6	5	3	5	0	6	6	0	3	6	6	6	6	5	0	3	3	1	3	3	3	3	2	0	0	3	3	0	2	0	0	0	0	0	0		0	0	0	0	1	1
480	1	3	3	3	5	3	6		0	6	6	5	0	3	1	3	6	6	6	0	6	0	1	0	0	0	0	1	1	1	0	0	3	0	0	0	0	0	0	0	0	0		0	0	0	0	0	0
481	5	4	4	6	4	4	6	3	5	2	2	3	3	3	0	0	6	5	5	4	0	3	2	1	2	1	3	1	3	1	3	1	3	1	2	1	1	1	1	0	1	0	2	0	0	0	0	0	1
482	3	5	4	6	1	0	6	3	6	1	1	5	5	3	0	1	6	6	6	3	6	1	1	0	0	1	2	0	1	1	1	0	2	1	0	0	1	1	0	0	1	0	2	0	0	1	1	1	1
483	5	4	5		4	5	6	6	6	6	6	3	5	5	4	5	5	6	4	6	3	0	2	2	3	2	3	2	3	0	3	1	3	3	3	3	0	1	1	1	1	1	1	0	0	0	0	0	0
484	3	3	5	6	0	5	6	5	3	0	0	6	5	5	0	3	6	1	1	1	6	2	1	0	2	1	2	0	3	0	1	1	3	1	1	2	0	0	0	0	0	0		0	0	0	0	1	1
485	0	1	0	6	2	2	6	0	4	0	0	5	5	1	0	1	5	5	1	0	5	1	1	0	1	0	1	1	1	1	0	0	2	0	0	0	0	0	0	0	0	0		0	0	0	0	0
487	1	1	1	6	1	1	6	1	6	1	1	6	1	1	1	1	6	6	6	1	6	1	1	0	1	0	2	0	1	0	0	0	3	0	1	0	0	0	0	0	0	0		0		0	0	0	1
488	2	5	5	6	4	3	6	3	6	0	0	3	2	5	2	0	6	5	5	4	5	2	2	1	1	1	1	1	2	1	1	1	2	1	0	1	0	0	0	0	0	0		0	0	0	0	1	1
489	1	1	3	6	0	0	6	1	6	0	1	3	0	5	0	1	5	5	6	0	5	1	1	1	1	0	2	1	2	1	1	0	1	1	1	1	0	0	0	0	0	0		0	1	0	0	1
490	6	5	6	3	0	6	5	6	1	6	6	0	6	6	0	5	5	5	4	6	1	6	2	3	3	2	3	2	2	0	1	2	1	3	1	1	0	1	0	0	1	1	1	0	1	0	1	0	0
491	1	1	3	5	1	3	6	0	3	3	3	2	1	1	5	4	5	3	5	1	5	1	2	0	1	0	2	1	1	1	1	0	2	0	1	0	0	0	0	0	0	0		0	0	0	1	1	1
492	1	1	1	6	1	0	6	1	6	0	0	5	3	3	1	0	6	6	6	0	6	3	1	0	0	0	1	0	1	1	1	0	1	0	1	0	0	0	0	0	0	0		0	1	0	0	1	1
493	3	2	2	5	4	3	6	1	6	0	4	5	2	2	2	1	5	6	5	1	5	2	2	1	1	0	2	0	1	1	0	0	1	0	0	0	0	0	0	0	0	0		0	0	0	0	0	1
494	1	1	3	6	0	0	6	1	1	0	3	3	6	3	0	3	6	5	1	1	1	0	1	1	2	1	3	0	2	1	1	0	1	1	2	1	0	0	0	0	0	0		0	1	0	0	0	0
495	3	3	5	5	5	4	5	5	1	5	5	2	4	5	3	5	4	4	1	5	4	0	3	1	2	1	3	2	3	1	1	1	2	1	1	2	0	0	0	0	0	0		1	0	0	0	0	0
496	0	0	0	6	1	0	6	0	5	1	0	6	0	0	3	0	6	6	5	0	5	1	1	0	0	0	1	0	0	1	0	0	2	0	1	0	0	0	0	0	0	0		0	0	0	0	0	0
497	1	5	3	6	5	4	6	3	6	3	5	5	1	1	3	5	6	6	6	3	3	5	2	0	2	2	3	2	1	2	2	3	2	2	2	1	0	0	0	0	0	0		0	0	0		0	0
498	1	4	2	6	5	1	6	1	2	1	0	3	3	0	3	1	6	5	3	0	6	0	1	1	1	0	1	1	2	2	0	0	0	0	0	0	0	0	0	0	0	0		0	0	0	0	1	1
499	1	3	3	5	6	6	5	4	3	4	6	5	6	5	6	1	6	5	3	0	5	3	2	0	0	0	2	1	1	1	1	0	2	0	1	0	0	0	0	0	0	0		0	1	0	0	1	1
500	3	3	1	6	0	1	6	3	5	0	0		5	3	6	6	6	6	6	0	6	0	2	0	0	0	3	0	1	0	1	0	0	0	0	1	0	0	0	0	0	0			0	0	0	0	1
501	5	6	5	5	0	5	6	5	5	0	5	4	6	5	4	6	5	3	5	6	5	6	3	2	3	1	3	2	2	1	2	0	2	1	1	0	0	0	0	0	0	0		0	0	0	0	0	1
502	6	6	6	5	1	3	6	5	6	1	1	4	6	5	1	4	6	6	5	6	6	1	2	0	3	1	3	2	2	2	3	2	1	1	2	1	1	1	0	0	1	1	2	0	1	1	0	0	1
503	1	4	4	4	5	4	6	3	5	3	2	5	5	5	3	3	5	5	6	4	5	1	2	0	2	1	3	1	2	1	2	1	3	1	2	1	0	1	0	0	1	1	1	0	0	0	0	0	1
504	5	5		6	0	0	6	3	3	0	0		6	3	0	3	5	5	6	3	3	1	1	1	1	2	2	1	3	1	2	0	2	1	1	0	1	0	0	0	0	0		0	1	0	1	1	1
505	2	3	5	5	3	3	5	1	3	1	1	4	1	1	1	1	5	5	5	1	3	1	2	0	2	1	2	0	1	2	2	1	1	1	1	0	0	1	0	1	1	0	2	0	1	0	0	1	1
506	6	6	6	6	0	6	6	0	6	0	6	6	6	6	0	0	6	6	6	0	6	0	0	0	0	0	3	0	0	3	0	0	3	0	0	0	0	0	0	0	0	0		0	0	0	0	1	1
507	0	0	1	6	5	1	6	0	6	0	1	6	0	1	1	0	6	6	6	0	5	0	1	0	0	0	0	0	1	1	1	0	1	0	1	0	0	0	0	0	0	0		0	0	0	0	1	1
508	6	6	4	6	4	6	6	6	3	3	0	0	6	5	0	3	3	3	1	6	6	3	3	0	3	2	3	2	3	3	3	2	1	2	2	1	1	0	0	0	0	0		0	0	1	1	1	1
509	4	5	3	6	3	3	6	4	6	1	2	6	5	3	0	0	6	6	6	3	6	0	2	0	3	2	3	2	2	1	2	1	2	2	2	1	1	1	1	0	1	0	2	0	0	0		1	1
510	3	4	5	5	5	0	5	1	5	6	0	4	3	6	4	0	5	5	5	0	6	6	1	0	0	0	0	0	0	1	0	2	0	0	0	2	0	0	0	0	0	0		0	0	0	0	0	0
511	3	4	3	6	3	3	6	3	5	1	1	5	3	1	1	3	5	5	5	3	5	1	2	1	2	1	2	2	2	2	2	1	1	1	2	1	1	1	1	1	0	0	2	0	1	0	0	0	1
512	1	5	4	6	1	1	6	1	5	0	0	3	3	3	1	0	6	6	5	3	6	0	1	2	2	1	2	1	2	2	1	1	0	1	1	1	0	0	0	0	0	0		0	0	0	0	1	1
513	0	1	1	6	0	1	6	0	5	0	3	6	1	1	0	0	6	6	5	0	6	5	1	0	1	0	1	0	1	1	1	0	2	0	1	0	0	0	0	0	0	0		0	0	0	0	1	0
514	1	1	3	3	3	1	6	1	3	0	0	4	2	1	3	1	6	6	3	1	6	6	1	0	0		2	0	2	1	1	0	2	1	1	1	0	0	0	0	0	0		0	0	0	0	1	0
515	3	5	0	3	5	6	5	3	1	6	1	5	6	3	5	6	5	5	3	3	1	6	3	0	0	1	2	1	1	1	0	0	2	0	0	0	0	0	0	0	0	0		0	0	0	1	1	1
516	5	5	0	6	0	5	6	5	6	0	0	5	5	6	0	1	5	6	5	5	5	1	2	0	0	1	3	2	2	1	1	0	3	0	1	0	0	0	0	0	0	0		0	0	0	1	1	1
517	4	4	1	6	5	0	6	1	1	0	0	0	6	6	0	0	5	5	4	1	5	0	1	1	0	0	0	1	2	1	0	1	0	2	0	3	0	0	0	0	0	0		0	0	0	0	0	0
518	6	6	6	6	0	5	6	4	5	0	0	4	5	5	0	5	6	6	6	6	6	0	3	1	1	1	3	1	2	2	3	1	1	1	0	3	0	1	0	1	0	0	1	0	1	0	1	1	1
519	2	4	3	6	4	1	6	2	6	0	0	6	5	0	0	0	6	6	5	3	5	0	1	0	1	0	1	1	2	1	0	0	3	0	1	0	0	0	0	0	0	0		0	1	0	0	1	1
520	5	5	6	3	5	6	5	6	0	4	5	0	6	6	5	6	3	3	3	6	3	5	2	3	3	3	3	2	2	1	1	1	1	2	1	1	0	0	0	0	0	0		1	0	0	0	0	0
521	3	3	3	6	5	3	6	2	5	0	0	5	1	2	3	2	6	6	6	3	6	1	1	0	2	0	2	1	1	1	1	0	2	0	1	0	0	1	1	1	0	0	1	0	1	1	0	1	1
522	1	2	6	5	0	1	6		1	0	0	5	0	4	0	0	0	6	5	1	3	1	1	1	2	1	2	1	1	2	1	0	2	2	1	0	0	0	0	0	0	0		0	1	0	0	1	1
523	2	4	3	6	1	2	6	2	6	0	0	6	3	0	0	0	6	6	6	2	1	0	1	0	1	0	2	1	2	1	1	1	2	1	1	1	0	1	0	0	1	0	2	0	0	0	0	1	1
524	1	1	0	6	0	1	2	0	1	0	0	5	1	1	0	1	5	1	3	0	4	0	1	0	0	2	0	1	1	1	0	1	1	1	1	0	0	0	0	0	0	0		0	0	0	0	0	1
525	1	3	1	3	0	1	6	1	6	1	2	3	0	1	0	1	6	5	5	1	5	0	1	0	0	0	2	0	2	1	1	0	3	0	1	0	0	0	0	0	0	0		0	1		0	0	1
526	1	3	4	6	3	0	6	1	6	3	3	5	4		1	1	6	6	6	1	5	0	2	2	0	1	3	1	1	0	0	0	1	1	0	0	0	0	0	0	0	0		0	0	0	0	1	1
527	5	5	5	6	5	6	5	5	4	5	0	3	3	5	5	3	2	5	4	5	1	1	1	1	1	2	2	2	1	2	2	1	2	1	0	0	0	1	0	0	1	0		0	1	0	1	1	1
528	0	1	1	6	1	1	6	0	5	0	0	5	1	5	1	0	6	5	3	0	3	0	0	0	0	0	1	0	1	1	0	0	1	0	0	1	0	0	0	0	0	0		0	0	0	0	1	1
529	0	3	2	6	0	3	6	1	6	0	1	6	1	5	0	0	6	6	6	1	6	0	1	0	0	0	1	0	1	0	0	0	1	0	0	0	0	0	0	0	0	0		0	1	0	0	1	1
530	1	2	5	6	0	3	6	1	5	0	3	3	3	3	0	3	5	5	5	5	6	4	1	1	1	0	1	0	1	2	2	0	2	0	1	0	0	0	0	0	0	0		0	1	0	0	1	1
531	1	4	2	5	3	3	6	2	5	4	4	1	1	5	5	1	6	5	4	2	2	1	2	2	2	1	2	1	1	2	2	0	2	1	3	1	1	1	0	0	1	0	2	0	0	1	0	0	0
532	5	6	5	5	3	5	6	3	6	5	5	3	6	5	0	3	5	3	6	5	6	1	2	1	0	2	1	2	2	3	1	2	2	2	1	2	0	0	0	0	0	0		0	0	1	1	1	1
533	1	2	5	6	0	0	6	1	6	1	0	3	0	1	0	0	6	6	6	1	6	1	1	0	1	0	2	0	0	1	1	0	0	0	0	0	0	0	0	0	0	0		0	0	1	1	0	1
534	0	1	1	6	0	1	6	0	3	0	1	5	0	1	1	0	5	5	4	0	5	1	1	0	0	0	1	0	1	1	0	0	1	0	0	0	0	0	0	0	0	0		0	0	0	0	1	1
535	3	3	5	6	5	3	6	1	0	1	1	5	5	1	1	2	5	5	3	1	6	4	2	1	2	1	3	1	1	1	2	1	1	0	1	0	1	0	0	0	0	0		0	0	1	1	0	1
536	5	5	6	6	4	5	6	5	2	5	6	2	6		5	6	5	6	3	6	5	6	3	1	3	2	3	2	2	2	2	1	1	2	2	1	0	0	0	0	0	0		0	0	0	0	0	1
537	1	1	3	5	1	0	6	1	6	0	0	3	1	3	4	1	5	5	5	1	6	0	1	0	0	0	2	1	1	1	1	0	1	0	1	0	0	0	0	0	0	0		0	0	0	1	1	1
538	5	6	5	6	0	6	6	5	3	4	0	3	6	6	1	3	6	6	4	6	5	1	2	1	3	2	3	1	3	2	3	3	2	2	3	3	1	1	0	0	1	0	2	1	1	1	0	1	1
539	1	0	2	6	1	1	6	0	5	1	1	5	1	1	1	0	5	5	6	0	6	1	1	0	0	0	2	1	1	1	1	0	1	0	0	0	0	0	0	0	0	0		1	1	0	0	1	1
540	5	6	5	6	3	6	6	6	6	0	0	4	5	5	4	6	6	6	5	5	5	4	3	2	1	3	3	2	3	2	3	1	3	2	1	3	0	0	0	0	0	0		0	0	0	0	1	0
541	5	5	5	6	3	4	6	5	5	0	3	2	5	5	5	5	6	4	4	6	5	0	3	1	2	2	3	2	3	2	3	1	3	1	2	2	0	1	0	0	1	1	1	0	0	0	0	1	1
542	0	1	0	1	0	0	6	0	6	0	3	6	0	0	0	1	6	6	6	0	6	6	1	0	1	0	1	3	3	1	1	0	0	0	1	0	0	0	0	0	0	0		0	1	0	0	1	1
543	6	6	5	6	0	0	6	6	6	0	0	4	5	6	0	5	6	6	6	6	6	0	3	1	3	1	3	1	2	2	3	0	2	1	3	2	0	1	0	0	1	0	1	0	0	0	0	1	1
544	6	6	6	5	1	2	6	3	5	1	3	3	3	5	2	2	5	5	5	4	4	5	3	0		1	3	2	2	1	2	0		0	1	0	0	0	0	0	0	0		0	0	0		1	0
545	3	5	5	3	5	6	2	4	2	4	3	3	5	3	5	5	4	4	3	3	1	4	2	1	2	0	2	2	2	3	2	0	2	1	2	1	1	1	0	0	1	0	2	0	0	1	1	0	0
546	4	3	3	5	3	4	5	3	4	2	2	3	4	3	2	5	4	4	4	3	4	4	1	0	1	0	1	1	1	1	0	0	1	0	0	1	0	0	0	0	0	0		0	0	0	0	0	1
547	5	5	4	6	1	3	6	3	6	1	1	4	3	5	1	5	5	6	5	0	5	1	1	0	1	0	2	0	1	0	1	0	2	0	2	0	0	0	0	0	0	0		0	0	0	0	1	1
548	1	5	3	6	1	1	5	3	5	1	0	3	3	4	0	2	6	6	6	3	5	0	2	1	1	1	2	1	1	1	1	1	0	1	1	0	0	0	0	0	0	0		0	0	0	0	1	1
549	5	5	6	5	6	6	3	5	1	5	5	0	5	6	6	5	3	1	1	5	2	5	3	3	2	2	3	2	2	3	3	1	1	2	2	2	1	1	0	0	1	1	2	0	0	1	0	0	0
550	6	6	6	6	6	6	6	6	5	6	5	3	5	6	5	6	3	5	5	6	3	5	3	3	2	2	3	2	2	3	2	1	2	2	2	1	0	1	0	1	1	1	2	0	0	0	0	0	0
551	0	0	0		0	0	6	0	6	0	0	6	0	0	0	0	6	6	6	0	6	0	1	0	0		1	0	1	0	0	3	0	0	0	3	0	0	0	0	0	0		0	0	0	0	0	0
552	3	3	5	5	1	5	6	3	6	0	0	2	3	5	0	3	6	6	6	1	5	3	2	1	3	2	3	2	3	2	2	1	2	2	2	3	0	0	0	0	0	0		0	0	0	0	0	0
553	4	3	6	6	3	1	2	1	0	0	0	0	5	0	0	3	2	3	0	3	6	0	1	3	2	1	2	2	0	3	0	1	0	1	0	0	0	1	0	1	0	0	1	0	0	0	0	0	1
554	3	3	4	6	3	0	5	3	5	0	3	3	6	5	1	3	6	6	6	3	6	0	1	0	2	1	2	1	2	2	1	0	0	1	1	0	0	1	1	1	0	0	1	0	0	0	0	0	1
555	1	4	3	5	1	3	5	3	6	3	3	5	5	6	2	1	6	5	5	3	3	1	2	1	2	1	3	1	2	1	1	1	1	1	2	2	0	1	1	1	0	0	1	0	0	0	0	0	1
556	6	6	6	0	6	6	0	6	0	6	0	0	6	6	6	6	0	0	0	6	0	6	3	3	3	3	3	3	3	3	3	3	0	3	3	3	1	1	1	1	1	1	2	0	0	1	1	0	1
557	6	6	5	5	3	5	6	4	6	0	3	3	4	6	0	6	5	5	4	5	3	1	3	2	3	2	3	2	3	1	1	1	1	2	1	1	1	1	0	0	1	1	2	0	0	0	0	0	0
558	1	1	0	1	0	0	6	0	6	0	0	6	1	3	3	0	5	6	6	1	1	3	1	0	0	0	1	0	1	1	1	0	2	0	1	0	0	0	0	0	0	0		0	0	0	0	1	1
559	1	1	3	6	1	0	6	6	6	0	0	5	3	3	0	1	6	5	4	1	3	4	2	1	0	1	1	1	2	0	1	0	1	1	0	0	0	0	0	0	0	0		0	0	0	0	1	1
560	3	5	5	6	1	1	5	3	6	0	0	3	6	6	0	0	5	6	6	3	5	0	2	2	2	1	3	0	2	1	1	0	2	1	2	2	0	1	0	0	1	0	1	0	0	0	0	1	0
561	6	6	6	5	2	1	6	5	5	1	1	1	1	1	3	0	6	5	2	5	5	1	3	1	3	1	3	2	2	2	2	2	1	3	1	3	0	0	0	0	0	0		0	1	0	0	0	0
562	1	1	2	1	2	2	3	1	3	1	1	3	0	1	1	0	4	4	4	1	1	0	1	0	0	0	1	0	1	1	1	1	1	0	1	0	0	0	0	0	0	0		0	0	0	0	1	1
563	2	1	3	5	0	2	4	1	1	0	1	3	4	2	0	0	5	5	4	1		0	1	1	1	0	1	1	1	1	1	0	1	1	1	1	0	1	0	1	0	0	1	0	0	0	1	1	1
564	3	3	2	5	3	5	5	1	6	2	1	3	3	4	3	5	5	5	5	2	3	1	2	1	2	0	3	1	1	1	0	0	0	0	0	0	0	0	0	0	0	0		0	1	0	1	1	1
565	0	2	3	6	0	0	6	0	5	1	1	5	3	1	0	1	6	0	3	0	3	0	2	1	0	0	1	1	1	2	0	1	2	1	0	0	0	0	0	0	0	0		0	0	0	0	1	1
566	3	4	3	5	2	1	3	2	1	2	4	4	5	3	3	3	4	4	3	2	3	2	2	1	2	1	3	1	2	1	1	1	1	2	1	1	1	1	1	0	1	0	2	0	0	0	0	0	0
567	6	6	6	3	5	4	5	5	5	0	2	3	6	6	4	6	4	4	2	6	1	4	2	2	1	2	3	0	2	1	3	1	1	1	3	2	1	0	0	0	0	0		1	0	1	1	1	1
568	1	1	1	6	3	0	6	0	6	0	3	6	1	1	1	0	5	6	6	1	5	0	1	0	0	0	1	0	1	1	1	0	2	0	1	0	0	0	0	0	0	0		0	0	0	0	1	1
569	6	6	6	5	5	6	5	6	5	4	6	2	6	6	5	6	5	5	3	6	5	6	3	3	3	1	3	3	2	3	3	1	3	1	2	1	1	1	1	1	0	0	1	0	1	1	1	0	1
570	2	3	3	6	1	1	6	0	6	0	1	3	3	4	3	2	6	5	2	1	5	1	1	0	0	0	1	1	1	1	0	0	0	0	0	0	0	0	0	0	0	0		0	1	0	1	1	0
571	5	6	6	0	3	5	5	3	3	1	2	3	2	5	2	2	4	2	2	3	3	2	2	2	1	2	2	2	2	1	1	1	2	2	1	2	0	0	0	0	0	0		0	0	0	0	1	1
572	5	5	5	5	5	4	3	4	3	0	5	3	4	6	0	3	3	3	2	5	4	2	3	1	1	2	2	2	2	2	1	0	2	2	1	0	0	0	0	0	0	0		0	0	0	0	0	0
573	3	3	5	5	2	4	3	4	4	4	4	3	6	5	3	2	4	3	3	3	3	5	2	2	2	2	3	2	3	2	1	0	3	2	1	3	0	0	0	0	0	0		0	0	0	1	1
574	1	1	3	6	5	4	6	0	5	0	1	5	1	1	1	1	1	1	6	0	6	1	1	0	1	1	1	1	2	1	0	0	0	0	1	0	0	0	0	0	0	0		0	0	0	0	0	1
575	3	3	3	3	1	1	6	1	3	0	3	3	3	3	2	0	6	6	6	3	6	0	1	0	0	0	1	0	1	1	1	0	3	0	1	0	0	0	0	0	0	0		0	0	0	0	1	1
576	4	4	1	1	0	1	6	0	6	0	6	5	0	0	0	0	6	6	6	0	5	0	1	0	0	0	0	1	1	1	0	0	1	0	0	3	0	0	0	0	0	0		0	0	0	1	1	0
577	2	5	3	6	0	0	6	1	5	1	1	5	4	6	2	1	5	5	5	1	2	0	2	1	1	1	1	1	2	1	0	1	2	1	0	0	0	0	0	0	0	0		0	0	0	0	1	1
578	3	3	5	5	5	3	5	5	5	3	5	3	3	3	3	1	6	5	5	3	3	3	2	2	1	2	3	2	2	1	3	1	1	2	1	0	1	1	0	0	0	0	2	0	0	0	0	0	1
579	6	6	6	6	5	6	6	6	6	6	6	3	6	6	5	5	6	6	6	6	6	0	2	3	1	3	3	2	2	3	3	1	2	2	3	3	0	0	0	0	0	0		0	0	0	0	0	0
580	1	3	1	1	0	1	6	1	5	0	2	5	1	3	0	1	6	5	5	1	5	1	2	0	1	0	2	0	1	1	1	0	2	0	1	0	0	0	0	0	0	0		0	1	0	0	1	1
581	5	5	5	6	2	1	6	5	5	1	5	3	3	3	0	3	5	6	6	3	5	0	2	2	3	1	2	1	2	1	0	0	0	1	1	1	0	0	0	0	0	0		0	0	0	0	0	0
582	6	6	5	6	1	1	5	5	2	0	0	3		5	1	1	6	5	4	5	4	1	3	1	3	2	3	2	2	2	3	3	2	2	3	3	0	1	0	1	1	0	1	1	0	0	0	0	0
583	0	1	2	6	0	1	6	0	5	0	2	5	1	1	0	0	6	6	3	1	1	0	1	0	0	0	0	0	1	1	0	0	1	0	0	1	0	0	0	0	0	0		0	0	0	0	1	1
584	5	6	6	3	5	5	5	3	5	6	5	1	5	6	6	2	5	2	3	3	4	1	2	1	2	1	3	2	2	1	1	0	3	1	0	1	0	1	0	1	0	0	1	1	0	0	0		1
585	5	6	5	6	0	6	6	3	6	0	0	5	6	6	0	3	5	3	3	5	0	0	2	3	0	1	2	2	1	1	1	1	0	2	1	2	0		0	0	0	0		0	1		0	0	0
586	3	4	4	3	5	4	3	4	1	4	5	1	4	5	2	2	3	2	2	2	2	5	2	1	2	1	2	1	1	2	2	0	2	1	2	0	1	1	1	1	0	0	2	0	1	0	0	1	1
587	3	4	2	5	4	4	5	1	5	3	1	4	5	5	3	5	5	3	4	1	2	1	2	1	2	0	2	1	2	1	1	0	3	0	1	0	0	1	0	1	1	0	1	0	0	0	1	1	1
588	1	3	2	6	3	0	6	0	6	2	5	5	5	5	0	1	6	6	6	1	5	5	1	0	2	0	2	1	2	1	1	3	3	0	1	1	0	0	0	0	0	0		0	0	0	0	0	1
589	1	3	1	5	1	2	6	1	6	1	0	5	1	4	1	1	5	4	4	1	3	2	1	0	0	0	1	1	2	1	1	0	3	0	1	0	0	0	0	0	0	0		0	1	0	0	1	1
590	1	2	1	4	5	4	5	2	3	3	1	3	4	1	5	1	6	5	4	1	3	0	2	0	1	0	2	1	1	0	1	0	2	0	2	0	0	0	0	0	0	0		0	0	0	0	0	1
591	1	3	1	5	0	1	6	1	5	0	1	6	4		0	1	6	6	6	2	5	0	1	1	2	1	3	1	2	1	1	1	3	1	1	1	0	0	0	0	0	0		0	0	0	0	0	0
592	2	3	4	6	3	1	6	1	3	0	0	5	3	3	0	0	6	6	5	1	3	3	1	0	0	1	0	0	2	1	0	0	0	0	0	0	0	0	0	0	0	0		0	0	0	0	1	1
593	5	4	6	6	0	6	6	4	6	0	0	3	6	6	0	3	3	5	4	4	5	0	1	1	3	1	2	2	2	1	2	0	1	1	1	0	0	0	0	0	0	0		0	1	0	0	1	0
594	1	1	0	6	0	0	6	0	6	0	0	6	3	1	0	0	6	6	6	0	6	3	2	1		0	3	1	2	0	2	1	2	0	2	2	0	0	0	0	0	0		0	0	0	0	0	1
595	3	6	5	6	0		6	1	6	0	0		1	6	0	0	6	6	6	5	6	0	1	0	0	0	0	0	1	0	0	0	0	0	0	0	0	0	0	0	0	0		0	1	0	0	0	1
596	3	3	5	3	0	1	5	3	4	0	6	4	4	3	1	3	5	5	3	3	2	6	2	1	1	1	3	2	2	2	1	2	2	2	1	2	0	0	0	0	0	0		0	0	0	0	0	1
597	1	1	1	1	0	3	6	1	5	3	1	1	1	1	1	3	5	5	3	1	1	0	1	0	1	1	0	2	1	1	2	1	2	2	1	2	0	1	0	1	0	0		0	0	0	0	1	0
598	2	3	3	6	0	1	6	0	5	1	1	5	1	4	1	1	6	5	5	1	6	1	0	0	0	0	1	1	1	0	1	0	1	0	1	0	0	0	0	0	0	0		0	0	0	0	1	1
599	0	1	0	6	0	1	6	0	6	0	0	6	1	0	0	0	6	6	6	0	6	1	0	0	1	0	0	0	3	1	0	0	3	0	0	0	0	0	0	0	0	0		0	0	0	0	1	1
600	5	6	6	5	5	6	6	6	6	5	2	4	6	6	0	0	6	6	6	6	6	6	3	3	2	3	3	2	3	1	1	0	3	3	1	2	1	0	0	0	0	0		1	0	0	0	0	1
601	4	5	3	3	3	6	5	5	3	6	6	3	4	6	6	6	5	2	3	5	2	5	2	3	1	2	1	2	2	2	2	1	3	2	2	3	1	1	0	0	1	1	1	0	0	0	0	1	0
602	1	3	2	6	1	0	6	0	5	0	0	5	3	1	0	3	6	5	5	0	6	1	1	0	1	0	2	0	2	1	1	1	2	0	0	0	0	0	0	0	0	0		0	1	0	0	0	1
603	5	5	6	6	5	5	5	5	4	5	6	5	6	5	5	6	6	6	1	3	1	6	3	3	1	1	2	1	2	3	0	1	3	1	0	0	1	0	0	0	0	0		0	0	0	1	1	1
604		6	6		3	3	5	5	5	1	0	1		1	5	5	5	5	3	6	4	0	2	2	2	2	3	1	1	2	1	0	2	1	2	1	1	1	0	0	1	0	2	0	0	0	1	1	0
605	5	6	6	6	0	5	5	4	1	0	0	1	3	3	0	0	3	5	2	3	5	0	2	1	3	1	2	2	2	3	2	0	0	1	2	0	0	1	0	0	1	1	1	1	1	0	0	0	1
606	1	1	4	2	0	1	5	0	3	0	1	3	1	0	0	1	5	3	3	1	3	1	1	0	1	0	1	0	1	1	1	1	1	0	0	1	0	0	0	0	0	0		0	1	0	0	0	1
607	6	6	6	6	6	6	4	6	3	5	5	2	6	6	4	4	4	3	3	6	5	6	3	2	3	2	3	2	2	3	3	2	1	2	3	3	0	0	0	0	0	0		0	0	0	0	0	0
608	5	6	6	1	6	5	1	6	1	6	6	1	5	6	5	6	1	1	0	6	0	5	3	3	3	3	2	2	2	1	2	3	2	3	2	3	0	1	0	0	0	1	1	0	0	0	0	0	0
609	6	6	3	5	2	5	3	6	0	3	4	0			1	6	0	2	3	6	0	1	3	2	0	3	2	3	2	2	2	1	2	2	1	3	0	1	0	0	0	1	1	1	0	0	0	0	0
610	2	3	5	5	0	2	6	2	5	1	5	4	2	4	3	3	6	6	5	4	5	4	1	1	0	1	1	1	1	1	2	0	0	0	1	0	0	0	0	0	0	0		0	1	0		0	0
611	1	1	2	6	3	5	3	1	5	4	0	3	6	6	4	3	6	4	2	2	3	6	2	1	0	1	2	2	1	1	0	1	2	0	0	1	0	0	0	0	0	0		0	0	0	0	0	1
612	5		5	5	6	3	3	5	4	5	2	2	5	3	3	2	3	3	4	3	3	2	2	2	3	0	2	1	2	2	3	0	3	2	2	1	1	1	1	1	1	0		0	1	0	0	1	1
614	4	3	5	6	3	3	6	5	5	0	1	3	5	6	4	1	6		5	6	1	1	2	2	1	1	3	1	2	2	1	1	2	1	2	1	0	1	1	1	0	0	1	0	0	0	0	1	1
615	4	5	5	2	2	3	6	3	5	0	0	5	5	5	1	4	5	5	5	4	4	0	2	0	0	1	2	1	2	1	0	0	2	1	1	0	0	0	0	0	0	0		0	0	0	0	0	1
616	6	6	5	5	6	6	6	4	3	0	5	4	6	6	0	4	5	1	0	6	6	0	3	1	1	1	3	2	1	2	2	0	2	1	0	0	0	0	0	0	0	0		0	0	0	0	1	1
617	2	1	2	5	0	1	6	2	6	4	5	2	5	5	5	5	5	5	4	4	5	1	2	1	3	1	2	2	2	1	1	0	1	1	1	0	0	1	0	0	0	1	2	0	0	1	0	1	1
618	6	6	5	5	5	4	4	5	2	5	5	1	5	5	4	5	6	5	4	6	3	6	2	1	3	0	3	2	2	1	3	1	2	2	2	1	0	0	0	0	0	0		1	0	0	0	1	1
619	3	3	1	5	5	1	6	3	6	0	0	5	3	5	0	0	5	6	5	4	3	5	1	0	0	0	2	1	1	1	0	0	0	0	0	0	1	1	0	0	1	0	2	0	0	1		0	1
620	5	6	6	1	5	5	5	6	4	6	6	2	6	5	3	6	5	2	5	6	1	6	3	2	3	1	3	2	1	1	3	0	0	1	2	0	0	0	0	0	0	0		0	1	0	0	0	1
621	1	3	3	6	3	1	6	0	6	0	1	5	5	3	0	0	6	6	5	1	3	4	2	0	1	0	2	1	1	1	1	0	2	0	0	0	0	1	0	0	1	0	2	0	0	0	0	1	1
622	6	6	6	5	6	6	6	6	3	6	6	0	6	6	6	6	5	3	2	6	6	4	3	3	3	2	3	3	3	3	3	1	3	3	3	2	1	1	0	0	0	1	1	1	1	1	1	1	1
623	5	5	5	4	5	3	3	3	1	0	3	1	1	4	2	1	5	3	1	5	3	0	2	3	0	2	1	1	2	1	0	2	2	0	0	1	0	0	0	0	0	0		0	0	0	0	0	1
624	4	3	3	6	0	3	6	3	1	1	3	1	3	3	0	3	4	3	0	1	2	0	2	1	2	2	3	2	2	2	3	2	0	2	2	1	0	0	0	0	0	0		0	0	1	0	1	1
625	0	3	2	6	0	5	6	3	0	0	0	6	0	3	1	0	6	5	6	1	3	4	2	1	0	0	3	0	1	1	0	3	1	0	2	1	0	0	0	0	0	0		0	1	0	0	0	1
626	5	4	5	6	0	5	6		5	6	5	0	5	0	3	1	6	3	3	5	6	0	1	1	1	1	1	2	1	1	1	0	0	1	1	1	0	0	0	0	0	0		0	0	0	0	1	1
627	6	6	6	3	6	6	3	6	3	6	6	0	6	6	6	6	3	3	3	6	3	6	3	3	3	3	3	3	3	3	3	2	3	3	2	3	1	1	0	1	0	1	2	0	0	0	0	0	0
628	5	5	5	4	5	5	4	6	2	4	5	2	6	6	4	5	5	4	4	6	2	5	3	3	0	1	2	2	1	2	0	0	1	2	1	0	0	0	0	0	0	0		0	1	0	1	1	1
629	3	5	4	6	5	3	5	6	1	0	5	0	6	5	3	5	5	0	3	6	3	5	2	1	0	1	2	1	0	3	0	0	0	1	0	0	0	1	0	0	1	0	2	0	0	0	0	0	1
630	3	3	4	4	1	1	4	3	3	1	1	3	5	5	1	1	6	5	3	5	5	4	2	1	2	1	2	1	3	2	1	0	2	2	2	1	0	1	1	1	1	0	1	0	1	0	0	1	1
631	3	3	1	6	0	1	6	3	3	0	6	5	4	3	4	5	6	6	6	3	6	5	2	1	0	0	3	1	1	1	1	0	1	0	1	0	0	0	0	0	0	0		0	0	0	0	1	1
632	5	5	3	4	3	3	6	3	3	3	3	5	3	5	3	3	6	1	3	3	4	1	2	1	3	1	2	2	1	0	1	1	1	0	2	0	0	0	0	0	0	0		0	1	0	0	0	0
633	1	1	1	1	1	1	6	0	5	3	5	2	3	1	3	1	5	4	4	0	5	0	1	0	0	0	1	0	1	1	1	0	0	0	0	0	0	0	0	0	0	0		0	0	0	0	1	1
634	3	4	1	6	2	5	6	3	4	0	6	5	6	3	0	4	6	3	3	1	2	5	1	1	0	1	2	1	2	1	0	1	2	1	0	1	0	0	0	0	0	0		0	0	0	0	1	0
635	5	5	3	5	0	3	6	3	5	1	1	3	1	5	1	1	5	5	5	5	6	1	2	0	1	0	3	1	2	2	1	0	3	0	1	1	0	0	0	0	0	0		0	0	0	0	1	1
636	2	5	5	6	1	1	6	4	5	0	0	3	5	4	1	0	6	5	3	4	6	2	1	0	1	1	2	2	1	0	0	0	0	1		0	0	0	0	0	0	0		0	0	0	0	0	1
637	5	5		6	1	5	6		1	0	0	1	5	5	0	5	5	3	1	5	6	0	3	3	3	2	3	2	3	2	3	2	3	2	3	3	1	1	0	0	1	0	2	0	0	0	0	0	0
638	2	3	5	6	3	3	6	1	5	1	2	5	1	2	1	1	6	6	5	1	2	0	1	0	0	0	1	0	0	1	0	0	1	0	1	0	0	1	0	1	0	0	1	0	0	0	0	1	1
639	3	5	5	6	2	5	6	4	5	0	6	5	5	5	0	6	6	0	5	3	5	0	2	1	2	2	2	2	1	1	1	0	1	1	2	0	0	1	0	0	1	1	1	0	1	0	1	0	1
640	5	5	6	5	1	3	3	4	2	1	0	1	5	5	1	5	1	1	1	4	2	0	3	1	2	2	2	2	3	2	3	2	2	1	3	3	0	1	1	1	0	0	1	0	0	0	0	0	1
641	0	0	1	6	1	0	6	0	5	0	1	6	0	1	1	0	6	6	5	0	6	0	1	0	0	0	1	0	0	0	1	0	0	0	0	0	0	0	0	0	0	0		0	0	0	0	1	1
642	3	5	5	6	1	1	6	2	6	6	0	1	6	6	0	3	6	6	5	3	6	5	1	0	2	0	2	1	2	2	2	0	1	0	2	0	0	0	0	0	0	0		0	0	0	0	1	1
643	5	5	5	5	1	4	6	4	6	2	6	4	5	5	3	3	2	5	5	4	5	5	2	3	0	1	3	2	2	2	2	1	2	2	2	1	0	1	0	0	1	1	1	0	0	0	0	0	0
645	5	5	5	6	0	5	6	6	6	1	1	3	5	5	0	6	4	5	1	6	5	0	3	3	3	2		2	3	1	3	1	1	3	3	2	0	1	0	0	1	0	2	0	0	0	0	0	0
646	3	4	6	5	2	3	5	3	6	0	0	3	1	3	0	1	5	6	6	3	5	1	1	1	0	1	2	1	1	1	2	0	1	0	1	0	0	0	0	0	0	0		0	0	0	0	1	1
647	1	5	1	5	6	4	5	0	6	0	0	1	5	5	5	2	3	3	1	1	1	0	3	1	1	1	2	1	3	2	1	1	0	1	1	1	0	0	0	0	0	0		0	0	0	1	1	1
648	5	6	6	6	1	3	6	6	5	0	0	0	3	3	0	1	6		5	5	6	0	3	3	3	2	3	2	2	2	2	1	1	2	1	2	0	0	0	0	0	0		0	1	1	1	0	1
649	3	3	2	1	0	0	6	0	6	0	0	5	1	5	0	0	6	6	6	1	6	0	1	0	0	0	3	0	2	1	0	1	1	0	1	0	0	0	0	0	0	0		0	0	0	0	0	1
650	5	5	5	6	0	0	6	1	6	0	6	5	0	5	0	0	6	6	6	3	6	1	1	0	0	0	2	1	2	1	1	0	1	0	1	0	0	0	0	0	0	0		0	0	0	0	0	0
651	6	6	6	6	6	5	4	5	3	4	3		1	5	5	3	5	3	4	6	4	6	3	0	2	2	3	2	2	2	3	3	0	2	2	3	0	0	0	0	0	0		0	0	0	0	0	0
652	3	3	3	3	2	3	4	2	2	0	0	3	4	2	1	4	3	2	2	2	1	1	1	2	3	2	3	1	2	1	1	0	1	1	2	1	0	0	0	0	0	0		0	0	0	0	0	0
653	3	2	4	4	2	2	1	1	1	0	0	4	2	1	1	2	4	5	1	4	3	0	3	1	2	0	3	0	1	2	2	0	3	1	3	0	1	1	0	0	1	0	2	0	0	0	0	1	1
654	5	5	6	6	0	5	5	5	5	0	3	1	5	6	1	0	6	6	6	6	3	3	2	2	3	2	3	2	3	3	2	1	3	2	2	1	0	1	1	1	0	0	1	0	1	1	1	1	0
655	0	1	3	6	3	3	6	1	4	2	0	3	6	4		5	5	5	6	1	5	5	2	1	0	1	3	1	2	1	1	1	2	1	1	0	0	1	0	0	1	0	1	1	1	0	0	1	1
656	5	5	5	6	0	0	5	5	4	5	6	0	6	6	5	0	6	4	6	6	6	0	0	1	0	2	2	3	3	1	0	0	0	3	0	3	0	0	0	0	0	0		0	0	0	0	0	0
657	4	4	5	6	4	3	6	6	6	1	6	2	6	6	2	0	6	6	6	5	5	2	3	1	1	1	3	2	2	2	1	1	0	1	0	0	0	0	0	0	0	0		0	1	1	1	1	1
658	4	5	5	3	5	5	3	3	3	4	4		3	6	4	4	4	5	4	3	4	5		1	2	1	3	2	2	3	1	1	1	1	2	1	0	0	0	0	0	0		0	0	0	0	1	1
659	3	4	3	5	0	0	6	4	3	0	0	1	4	4	0	3	5	4	3	3	0	0	1	1	2	1	2	1	2	2	1	1	0	1	0	0	0	0	0	0	0	0		0	0	0	0	1	1
660	1	1	1	6	1	0	6	0	5	0	0	6	0	1	1	1	6	5	6	0	6	1	1	0	0	0	1	0	1	1	1	0	0	0	1	0	0	0	0	0	0	0		0	1	0	0	0	1
661	4	3	5	6	3	3	6	3	5	0	0	5	3	4	0	4	6	6	5	2	3	1	1	1	1	1	1	1	1	1	1	1	2	1	0	0	0	0	0	0	0	0		0	0	0	0	0	0
662	5	6	6	3	5	6	5	6	0	6	5	0	6	6	3	6	4	0	1	6	0	1	2	1	3	2	3	2	2	2	2	0	0	2	1	1	0	0	0	0	0	0		0	1	1	0	1	0
663	5	4	5	6	3	3	5	4	2	3	3	3	5	5	3	3	5	5	5	4	5	3	2	0	2	1	2	1	2	2	2	1	2	0	2	0	0	1	1	1	0	0	1	0	0	0	0	1	1
664	6	6	5	6	3	5	5	3	0	3	1	1	6	5	1	1	3	1	1	5	0	1	3	3	2	3	3	2	3	2	2	1	2	2	2	3	0	0	0	0	0	0		0	1	0	0	0	0
665	5	4	3	6	5	4	6	6	3	2	0	0	0	0	6	4	6	0	4	6	6	5	3	1	3	2	3	2	2	0	2	0	1	2	1	1	0	0	0	0	0	0		1	0	0	0	1	0
667	3	0	1	3	0	1	6	0	4	0	0	3	0	1	0	1	5	5	4	0	3	1	1	0	1	0	1	1	1	1	1	0	0	0	1	1	0	0	0	0	0	0		0	0	0	0	1	0
668	5	5	5	6	4	3	6	5	5	0	0	4	5	5	2	0	6	6	6	5	6	3	2	1	3	1	2	2	2	2	2	1	3	1	2	0	0		0	0	0	0			1	1	0	1	1
669	6	6	5	6	0		5	6	6	3	1	6	6	3	1	3	6	6	6	5	2	0	2	0	2	1	2	0	0	2	1	1	3	1	0	0	0	0	0	0	0	0		0	0	0	0	0	1
670	3	1	3	6	2		6	2	4		5	5	5	1	4	1	6	6	3	1		3	1	1	0	1	1	1	1	1	1	0	0	2	0	0	0	0	0	0	0	0		0	0	0	0	1	1
671	5	5	5	6	5	5	5	5	3	3	3	4	3	3	5	3	6	6	5	5	5	5	2	2	1	1	2	1	2	2	1	1	2	2	2	1	0	0	0	0	0	0		1	0	0	0	0	1
672	3	3	4	5	4	2	6	1	3	4	5	3	5	3	2	1	5	5	5	3	3	6	1	0	0	0	0	1	1	1	0	1	1	1	1	2	0	0	0	0	0	0		0	0	0	0	0	1
673	0	0	0	6	0	0	6	0	6	0	0	6	0	0	0	0	6	6	6	0	6	0	1	0	0	0	0	0	0	0	0	0	0	0	0	0	0	0	0	0	0	0		0	0	0	0	0	0
674	6	6	6	6	5	6	4	6	2	6	6	2	6	6	6	6	2	2	3	6	0	6	3	3	3	2	3	2	3	3	3	1	3	2	3	2	1	1	0	0	1	1	2	1	0	0	0	0	0
675	2	3	5	5	6	3	6	2	5	1	1	4	5	3	1	3	6	5	5	1	1	4	2	0	1	0	2	1	2	1	1	0	1	1	1	0	0	0	0	0	0	0		0	0	0	1	1	1
676	5	6	6	4	5	6	6	4	2	5	3	1	4	5	3	5	5	3	6	5	6	1	3	1	3	3	3	2	3	3	2	1	0	2	2	2	0	0	0	0	0	0		0	1	0	0	0	1
677	1	3	3	5	3	1	6	3	6	3	3	3	0	1	1	5	5	5	3	1	4	6	2	1	3	1	3	1	1	1	2	0	3	0	2	1	0	0	0	0	0	0		0	0	0	0	0	1
678	1	4	2	6	0	6	6	0	6	0	0	5	1	6	0	1	6	6	6	1	6	0	0	0	3	0	3	1	2	1	2	1	1	1	0	0	0	0	0	0	0	0		0	0	0	0	1	1
679	5	6	5	3	5	3	5	2	5	3	3	1	5	2	3	0	6	6	5	4	4	1	2	1	1	2	2	2	1	1	1	0	2	0	0	0	0	0	0	0	0	0		0	0	0	0	1	1
680	1	2	1	5	1	4	6	1	6	0	0	5	4	4	0	1	6	6	6	1	5	1	2	1	1	0	2	1	1	1	0	0	2	1	0	0	0	0	0	0	0	0		0	0	0	0	1	1
681	3	3	5	6	4	5	6	4	6	4	4	5	5	6	5	3	6	5	6	3	5	1	1	0	1	0	2	1	2	2	1	0	2	0	1	0	0	0	0	0	0	0		0	0	0	0	1	1
682	0	1	1	6	0	0	6	0	6	0	1	6	0	1	0	0	6	6	6	0	6	1	1	0	0	0	0	0	0	1	0	0	0	0	0	0	0	0	0	0	0	0		0	0	0	0	1	1
683	0	1	1	1	0	1	6	0	3	0	0	5	3	0	0	0	5	6	1	0	2	0	2	1		1		0	1	1	0	0		0	0		0	0	0	0	0	0		0	0	0	0	0	1
684	5	5	5	5	5	6	6	5	5	6	0	4	6	5	6	6	5	3	3	6	2	6	3	1	3	2	3	2	2	3	3	2	1	2	1	1	0	0	0	0	0	0		0	0	0	0	0	0
685	4	5	4	4	4	5	3	5	3	5	3	3	6	6	5	6	2	4	1	6	0	0	3	1	0	1	3	2	2	2	3	0	3	0	2	0	0	1	0	0	1	1	1	0	0	0	0		1
686	0	1	1	6	1	0	6	0	5	0	0	1	0	0	1	0	6	6	6	0	5	0	2	0	2	0	2	0	1	1	2	0	0	0	0	0	0	0	0	0	0	0		0	0	0	0	1	1
687	6	6	6	3	6	6	5	6	1	5	6	1	6	6	6	6	5	5	4	6	5	5	3	3	3	2	3	2	3	3	2	0	0	2	3	1	1	1	0	0	1	1	2	0	0	0	0	0	1
688	1	1	1	6	3	0	6	0	6	6	5	6	1	6	2	0	6	6	6	0	5	0	2	0	0	0	3	0	1	1	0	0	2	0	0	0	0	0	0	0	0	0		0	0	0	0	0	0
689	4	1	0	6	1	1	6	0	6	0	0	5	1	2	1	1	6	6	6	1	6	0	1	0	1	1	2	0	1	1	0	0	0	0	1	1	0	0	0	0	0	0		0	1	0	1	1	1
690	5	6	5	6	5	5	5	6	3	5	3	1	5	6	5	5	3	4	3	6	3	1	2	2	1	2	3	2	2	3	2	2	1	1	2	2	0	1	0	0	1	0	1	0	0	0	0	0	0
691	0	0	0	6	0	0	6	0	6	0	0	6	0	0	0	0	6	6	6	0	6	0	1	0	0	0	2	0	0	0	0	0	0	0	0	0	0	0	0	0	0	0		0	0	0	0	1	1
692	5	6	5	4	4	5	6	5	5	4	5	2	5	5	4	2	4	5	4	4	2	2	2	1	1	1	3	1	2	2	2	1	2	1	1	2	0	0	0	0	0	0		1	0	0	0	1	1
693	3	3	4	6	0	1	6	3	5	1	1	3	3	2	1	1	6	5	3	3	3	1	2	1	0	1	2	1	2	1	0	0	0	1	0	1	0	0	0	0	0	0		0	1	0	0	1	1
694	1	1	1	1	1	0	6	0	6	0	3	6	0	0	3	1	6	5	5	0	6	1	1	0	0	0	1	0	0	1	1	0	0	0	0	0	0	0	0	0	0	0		0	0	0	0	1	1
695	0	0	1	6	1	0	6	0	5	0	0	6	0	0	0	0	6	6	5	0	6	1	1	0	0	0	0	0	0	0	0	0	0	0	0	0	0	0	0	0	0	0		0	0	0	0	0	1
696	3	5	1	6	5	0	6	2	6	0	0	1	1	5	5	0	5	5	5	1	5	0	1	0	0	2	2	2	2	1	0	1	0	1	0	2	0	0	0	0	0	0		0	1	0	1	1	1
697	1	2	4	6	0	0	6	0	6	0	1	6	0	2	0	0	6		5	1	3	0	1	0	0	0	2	0	2	0	0	0	3	0	1	0	0	0	0	0	0	0		0	0	0	0	1	1
698	6	5	5	5	1	5	6	1	6	0	1	4	5	6	0	0	6	6	6	6	6	0	1	1	0	1	1	0	3	1	0	0	1	1	0	1	0	0	0	0	0	0		0	0	0	0	1	0
699	0	0	0	6	1	0	6	0	4	0	0	6	1	0	1	0	6	6	6	0	5	1	1	0	0	0	1	0	0	1	0	0	0	0	0	0	0	0	0	0	0	0		0	0	0	1	1	0
700	3	3	1	0	0	1	6	2	3	5	0	5	3	3	3	1	6	3	0	3	5	1	2	1	2	1	1	1	2	1	0	0	2	1	1	0	0	0	0	0	0	0		0	0	0	0	1	1
701	1	1	0	1	3	1	6	0	6	0	0	5	0	0	0	0	6	6	6	0	6	4	1	0	0	0	0	0	1	0	0	0	1	0	0	0	0	0	0	0	0	0		0	0	0	0	1	1
702	5	6	5	5	1	5	5	5	5	0	3	2	5	6	1	5	5	5	5	5	3	0	3	1	3	2	3	2	2	2	3	1	2	2	2	3	0	1	1	1	1	0	1	0	1	0	1	1	1
703	1	1	0	1	3	1	6	0	6	0	0	5	0	0	0	0	6	6	6	0	6	4	1	0	0	0	0	0	1	0	0	0	1	0	0	0	0	0	0	0	0	0		0	0	0	0	1	1
704	5	4	4	4	1	4	6	3	6	6	6	3	0	3	4	5	6	5	6	3	4	0	1	2	1	0	2	1	2	2	0	1	3	1	0	1	0	0	0	0	0	0		1	1	0	0	0	1
705	1	3	5	3		1	6	1	1	6	6	1	3	5	3	1	6	1	3	1	1	5	3	1	1	2	2	1	1	1	1	2	1	1	1	0	0	0	0	0	0	0		1	0	0	0	0	0
706	3	5	0	5	5	5	5	0	3	5	5	5	5	6	6	6	5	5	5	5	0	5	2	3	0	2	1	1	2	1	0	0	2	1	0	0	0	0	0	0	0	0		0	0	0	0	1	1
707	1	1	1	1	0	1	6	1	6	0	0	6	1	0	0	0	6	6	6	6	6	1	1	0	0	0	1	0	1	1	1	0	0	0	1	0	0	0	0	0	0	0		0	0	0	0	1	1
708	0	0	0	6	0	0	6	0	6	0	5	6	0	0	0	1	6	6	6	0	6	1	1	0	0	0	1	0	0	0	0	0	3	0	0	0	0	0	0	0	0	0		0	0	0	1	1	1
709	6	6	5	3	4	6	6	6	5	2	6	0	6	5	1	0	6	6	5	6	6	0	3	1	2	2	2	2	3	1	3	0	1	3	2	1	0	1	1	1	1	0	1	1	0	0	0	1	0
710	5	5	1	6	1	0	6	5	6	0	0	5	5	0	0	0	6	0	6	5	5	0	2	0	1	0	2	0	2	0	2	0	0	0	3	1	0	0	0	0	0	0		0	0	0	0	0	1
711	1	2	2	4	0	1	6	1	5	2	5	5	4	4	1	1	6	5	5	0	5	5	2	0	0	0		0	2	1	0	1	3	1	0	0	0	0	0	0	0	0		1	0	0	0	1	1
712	3	3	0	6	0	3	6	1	6	0	5	6	0	4	0	2	5	6	5	0		0	1	0	1	1	2	1	2	1	1	0	2	0	1	0	1	0	0	0	0	0			0	0	1	1	1
713	0	1	2	1	1	2	6	0	6	0	0	5	1	1	0	0	6	5	5	0	5	0	1	0	0	0	2	1	1	1	0	0	0	0	0	1	0	0	0	0	0	0		0	0	0	0	0	1
714	1	1	1	3	3	1	1	0	1	1	1	1	1	1	1	1	6	6	5	0	1	1	1	1	1	0	2	1	1	1	1	0	1	0	1	0	0	0	0	0	0	0		0	0	0	0	1	1
715	0	1	3	6	5	1	6	0	6	5	0	5	3	2	1	1	6	6	6	0	5	1	1	0	1	0	2	0	0	1	1	0	1	1	1	0	0	0	0	0	0	0		0	0	0	0	0	0
717	5	5	6	6	3	5	6	6	6	1	1	3	6	6	0	0	5	5	6	6	6	1	3	0	1	1	3	1	2	2	1	1	2	0	0	3	0	0	0	0	0	0		0	1	0	1	0	0
719	1	1	0	6	0	0	0	0	6	0	0	6	0	0	0	0	6	6	6	0	6	0	0	0	0	0	1	0	0	0	0	0	0	0	0	0	0	0	0	0	0	0		0	1	0	0	0	1
720	5	3	3	6	6	1	6	3	4	1	3	4	1	3	1	0	6	5	6	1	5	0	1	0	0	0	1	0	1	1	1	0	1	0	1	0	0	0	0	0	0	0		0	0	0	0	1	1
721	3	4	1	6	4	1	6	1	6	0	2	5	1	1	4	1	6	6	6	1	3	1	1	0	0	0	1	0	3	0	1	0	2	0	1	0	1	0	0	0	0	0		0	0	1	0	1	1
722	5	6	5	6	4	5	5	5	1	5	5	0	6	6	6	1	5	3	1	6	5	0	3	3	2	2	3	2	2	1	2	1	0	3	0		0	1	0	0	1	0	1	0	1	0	0	1	0
723	3	3	4	6	2	0	6	3	5	0	2	5	4	5	0	0	6	6	5	3	6	0	1	2	1	0	1	1	1	1	1	0	1	1	1	0	0	0	0	0	0	0		0	0	0	0	1	1
724	3	2	1	6	1	2	5	1	3	0		3	4	1	1	1				1	3	1	1	1	2	1	2	1	2	1	1	0	1	0	1	0	0	0	0	0	0	0		0	0	0	0	1	1
725	2	3	5	2	5	3	5	1	3	1	1	3	1	5	2	4	2	4	5	2	3	0	3	1	0	1	3	2	2	3	2	1	2	2	1	0	0	0	0	0	0	0		0	0	0	0	0	0
726	6	6	5	5	6	0	5	5	4	6		3	3	6	5	1	1	2	3	6	0	0	3	2	1	2	3	2	1	1	1	1	2	2	1	1	0	1	0	0	1	0	1	0	0	0	0	0	0
727	1	0	1	1	2	3	6	0	6	0	1	5	0		0	1	6	6	6	0	6	0	2	0	0	0	1	0	1	1	1	0	0	0	1	0	0	0	0	0	0	0		0	0	0	0	1	1
728	6	6	6	5	0	5	3		3	0	3		0	6	0	5	3	1	3	6	3	3	3	1	3	2	3	2	2	2	3	0	3	1	3	1	0	1	0	0	1	0	1	0	0	0	0	0	1
729	2	1	1	1	0	1	6	1	6	0	0	3	1	1	0	0	6	6	6	1	6	0	1	0	1	0	2	1	1	1	1	0	0	0	1	0	0	0	0	0	0	0		0	1	1	1	1	1
730	3	6	6	2	5		5	5	3	5	6	1	6	6	5	5	6	0	0	6	6	5	2	2	0	0	0	1	1	1	1	0	0	2	1	0	0	0	0	0	0	0		0	0	0	0	0	1
731	4	5	4	3	5	3	5	1	2	3	3	1	5	2	2	4	4	5	2	2	3	5	2	1	2	1	2	1	1	1	2	0	1	1	2	1	0	0	0	0	0	0		0	0	0	0	1	1
732	5	5	5	5	1	3	5	1	5	0	0	5	3	2	0	3	5	5	4	1	6	5	1	1	1	0	1	0	1	1	1	0	0	1	0	0	0	0	0	0	0	0			1	0	0	1	1
733	3	3	2	6	5	3	5	2	5	6	6	3	5	4	5	4	5	5	4	4	4	3	1	1	1	1	2	1	1	1	1	0	2	2	1	0	1	1	0	1	1	1		0	1	1	1	1	1
734	6	6	6	2	4	6	5	6	3	6	6	2	6	6	5	5	5	3	1	6	4	4	3	3	3	2	3	3	1	1	1	2	1	2	2	1	0	0	0	0	0	0		1	0	0	0	0	0
735	0	1	1	6	0	0	6	0	6	0	1	5		1	1	1	6	6	6	1	5	1	1	0	0	0	2	0	1	1	1	0	2	0	1	0	0	0	0	0	0	0		0	0	0	0	0	1
736	5	3	3	3	3	1	5	0	6	5	0	6	0	0	0	1	6	6	6	0	6	0	1	0	0	0	1	0	2	1	0	0	3	0	0	1	0	0	0	0	0	0		0	0	0	0	1	1
737	0	0	0	6	0	0	6	0	6	0	0	6	0	0	0	0	5	5	5	0	6	0	0	0	0	0	1	0	0	1	0	0	0	0	0	0	0	0	0	0	0	0		0	0		0	1	1
738	3	4	3	6	5	4	6	4	6	4	5	4	5	5	1	1	6	6	4	3	6	4	2	1	1	1	2	1	1	2	0	2	1	1	0	0	0	0	0	0	0	0		0	0	0	0	0	1
739	5	3	1	6	1	5	6	1	4	0	3	5	5	5	1	3	5	5	5	2	3	4	1	0	0	0	2	1	1	1	1	0	0	0	0	0	0	0	0	0	0	0		0	0	0	0	0	1
740	1	3	3	3	5	2	6	3	3	3	6	3	6	6	4	0	6	3	3	3	1	6	3	2	3	0	2	2	2	1	1	1	3	1	2	1	0	0	0	0	0	0		0	0	0	0	1	1
741	3	3	1	1	0	1	6	1	6	0	0	6	1	6	0	1	5	5	6	1	6	1	1	0	0	1	2	1	1	1	1	1	0	0	1	1	0	0	0	0	0	0		0	0	0	0	1	1
742	4	5	5	3	0	4	6	3	4	0	2	1	3	4	0	3	6	2	5	2	3	1	3	1	2	1	2	1	2	1	1	1	3	0	2	2	0	0	0	0	0	0		0	0	0	0	0	1
743	3	1	1	1	0	3	6	4	5	1	4		1	1	0	1	6	5	5	1	6	0	1	0	1	0	1	1	1	1	0	0	0	0	0	0	0	0	0	0	0	0		0	1	0	0	1	0
744	2	3	1	6	0	1	6	0	6	0	3	5	3	6	1	1	6	5	5	1	6	1	1	0	0	0	2	1	1	1	1	0	3	0	1	0	0	0	0	0	0	0		0	0	0	1		1
745	0	1		1	1	0	5	0	3	0	0	5	0		3	0	6	3	3	0	6	0	0	0	0	0	0	0	0	1	0	0	0	0	0	0	0	0	0	0	0	0		0	0	0	0	1	0
746	5	5	5	5	5	4	6	3	6	0	0	3	5	5	1	3	5	6	3	3	5	0	2	0	0	1	1	1	2	0	0	0	2	0	0	0	0	0	0	0	0	0		0	0	0	0	1	1
747	4	5	5	3	1	3	3	3	1	0	1	1	1	1	1	3	3	1	1	1	1	2	2	1	1	1	2	2	2	1	0	1	1	0	0	1	0	0	0	0	0	0		0	0	0	0	1	1
748	1	1	1	6	4	1	6	0	5	1	1	3	1	1	1	1	6	2	2	0	6	0	1	0	0	0	0	1	0	1	1	0	0	0	1	0	0	1	0	1	0	0	1	1	0	0	0	1	1
749	3	2	3	5	1	1	6	2	3	1	3	3	3	3	3	3	5	4	3	3	4	1	3	1	1	2	3	2	2	1	1	2	2	1	1	2	0	1	0	0	1	1	1	0	0	0	0	0	0
750	1	0	0	1	0	0	6	0	5	0	0	6	1	1	0	0	6	5	5	0	4	1	1	0	0	0	1	0	0	0	0	0	1	0	0	0	0	0	0	0	0	0		0	0	0	0	1	0
751	1	1	1		0	0		0	6				1	1		0	6	6	6	1		0	1	0	0	0	0	0	1	1	1	0	1	0	1	0	0	0	0	0	0	0		0	0	0	0	0	1
753	1	4	4	6	0	0	6	1	6	0	1		0	5	0	0	6	6	6	2	6	0	0	1	0	0	1	0	1	0	1	0	2	1	0	0	0	0	0	0	0	0		0	0	0	0	1
754	1	1	1	1	1	1	3	0	1	0	0	5	1	0	0	0	6	1	1	1	6	1	1	0	1	0	2	0	1	1	1	0	1	3	1	1	0	0	0	0	0	0		0	0	0	0	0	0
755	3	3	1	6	0	0	6	3	6	3	6	6	0	5	0	0	6	6	6	3	3	0	1	1	0	1	2	0	2	1	0	0	2	2	2	0	0	0	0	0	0	0		0	1	0	0	1	1
756	1	1	1	1	1	0	6	1	6	1	1	6	1	1	1	0	6	6	6	1	6	0	1	0	1	0	2	0	1	1	1	1	1	0	1	1	0	0	0	0	0	0		0	0	0	0	1	1
757	1	1	1	3	0	0	5	0	3	1	0	3	1	1	1	0	6	6	5	0	5	0	1	0	0	0	1	1	1	1	1	0	0	0	1	0	0	0	0	0	0	0		0	1	0	0	1	1
758	3	3	5	5	0	1	6	1	6	2	6	5	6	5	2	3	6	5	5	2	6	1	1	2	2	1	2	1	2	1	1	0	1	1	0	1			0	0	0	0				0	0	0	1
759	2	2	1	6	1	0	6	0	6	0	0	5	1	1	1	1	6	6	5	0	6	1	1	0	0	0	2	0	1	1	0	0	1	0	0	0	0	0	0	0	0	0		0	0	0	0	0	0
760	6	6	6	6	3	0	5	5	4	1	0	2	5	6	0	0	5	4	6	6	5	4	2	0	3	1	3	1	2	1	2	1	2	1	2	1	1	1	1	0	1	0	2	0	1	0	1	0	1
761	0	1	1	6	0	1	6	0	6	0	0	6	1	0	0	0	6	6	6	0	6	0	1	0	0	0	0	0	0	0	0	0	1	0	0	0	0		0	0	0	0		0	0	0	0	0	0
762	0	0	1	6	3	1	6	0	6	0	0	6	0	5	1	1	6	6	6	0	5	0	1	0	0	0	0	0	1	1	0	0	0	0	0	0	0	0	0	0	0	0		0	1	0	0	0	1
763	2	5	6	5	1	0	6	1	5	5	5	1	6	5	5	5	5	6	5	5	3	3	1	2	2	2	2	2	3	2	2	1	1	1	2	0	0	0	0	0	0	0		0	1	0	0	1	0
764	6	5	6	6	0	5	6	5	5	0	0	3	5	6	5	5	5	6	6	5	5	5	2	2	2	1	3	1	2	2	1	3	3	1	2	3	0	0	0	0	0	0		0	1	0	0	1	0
765	3	1	3	6	5	0	6	0	5	0						1	5	5		0	5	1	1	0	0	0	1	0	1	1	1	0	2	0	0	1	0	0	0	0	0	0		0	0	0	0	1	1
766	0	1	1	5	0	1	6	0	6	0	1	5	0	0	0	1	5	6	5	0	5	4	1	0	0	0	1	0	1	1	0	0	2	0	0	0	0	0	0	0	0	0		0	0	0	0	1	1
767	1	0		6	1	1	6	0	6	0	1	6	1	0	0	0	6	6	6	0	6	5	1	0	1	0	3	0	3	1	0	0	3	0	1	0	0	0	0	0	0	0		0	0	0	0	1	1
768	1	0	1	3	0		6	0	5	3	4	5	3		3	0	5	5	5	0	5	3	1	0	0	0	0	0	1	1	0	0	1	0	0	0	0		0	0	0	0		0	0	0	0	1	1
769	2	5	4	4	5	4	5	5	3	3	6		3	3	3	3	4	4	4	3	6	1	2	1	1	1	2	1	1	2	1	1	2	1	1	0	0	0	0	0	0	0		0	0	0	0	1	1
770	4	3	5	5	4	0	5	3	3	1	4	2	4	3	0	3	5	4	2	5	5	1	2	1	2	0	2	1	1	1	2	0	1	1	1	0	0	0	0	0	0	0		0	1	0	0	1	1
771	6	5	5	6	5	5	6	5	5	0	5	2	5	5	2	3	5	4	5	5	4	0	2	1	2	1	2	1	2	2	2	1	2	1	2	1	0	1	0	1	0	0	2	0	0	0	0	1	1
772	2	4	4	6	0	4	6	2	6	0	2	6	4	2	0	0	6	4	6	2	6	0	2	1	2	1	2	1	1	1	1	0	1	0	2	1	0	0	0	0	0	0		0	1	0	0	1	1
773	0	1	3	6	0	1	6	0	5	0	0	6	0	0	0	0	6	6	6	1	6	0	1	0	0	0	2	0	1	1	1	0	2	0	0	0	0	0	0	0	0	0		0	0	0	0	1	1
774	1	1	3	5	3	2	3	1	1	1	3	1	6	1	1	3	3	3	1	1	0	4	2	0	2	2	2	1	2	1	1	0	0	1	2	0	0	0	0	0	0	0		0	0	0	0	0	1
775	1	1	0	6	0	1	6	0	6	0	0	5	0	2		1	6	6	6	1	3	0	1	0	0	0	1	1	1	1	0	1	0	0	0	1	1	1	1	0	1	0	2		0	0	0	1	1
776	3	4	3	5	4	3	3	1	2	1	4	3	5	5	4	1	4	3	4	4	4	0	2	1	1	2	3	2	2	1	1	1	1	1	1	2	0	0	0	0	0	0		0	0	0	0	0	0
777	2	2	0	6	5	2	6	0	6	0	0	6	0	1	1	1	6	6	6	0	6	0	1	0	0	0	2	0	0	1	1	0	1	0	1	0	0	0	0	0	0	0		0	0	0	1	1	1
778	1	3	1	6	0	1	6	1	6	1	3	5	1	3	5	1	6	6	5	1	5	5	2	1	1	1	2	1	2	1	0	0	1	1	0	0	0	0	0	0	0	0		0	0	0	0	1	1
779	3	3	2	4	4	3	5	2	5	5	5	2	3	4	5	4	4	6	5	5	5	1	2	1	3	2	3		2	3		2	2	1	1	1	0	1	0	0	1	0	1	0	0	0	0	1	1
780	1	1	1	1	0	1	6	1	5	1	1	5	1	5	0	1	6	1	5	1	6	1	1	0	1	1	2	1	1	1	1	0	1	0	1	1	0	0	0	0	0	0		0	0	0	0	1	1
781	6	6	3	6	0	0	6	3	4	4	4	2	4	6	0	0	6	6	6	6	6	0	3	0	0	1	1	0	3	0	2	1	3	1	0	3	0	0	0	0	0	0		0	0		0	1	1
782	3	2	1	6	0	0	6	1	6	0	5	5	1	1	0	1	5	5	5	0	5	1	1	0	1	0	1	0	3	1	0	0	2	0	0	1	0	0	0	0	0	0		0	0	0	0	1	1
783	0	1	1	1	5	0	6	1	4	6	6	6		5	1	0	6	6	6	1	6	1	1	0	1	0	1	1	2	0	1	0	0	0	0	0	0	0	0	0	0	0		0	0	0	0	1	1
784	3	3	2	3	3	0	6	3	5	0	0	5	5	5	0	1	6	6	6	3	6	0	1	1	2	2	3	0	3	2	0	1	0	2	0	1	0	0	0	0	0	0		1	0	0	0	1	1
785	5	5	5	5		5	6	3	6	5	0	0	5	5	0	0	6	6	6	5		1	1	1		1	1	2	0		0	1	0	0	0	0	0	0	0	0	0	0			0	0	0	0	1
786	5	3	6	6	5	3	5	2	5	5	3	3	0	4	4	2	6		5	4	3	0	3	1	3	1	3	1	3	1	1	1	3	2	1	3	0	0	0	0	0	0		0	1	0	0	0	1
787	2	5	3	6	0	1	6	1	5	1	3	6	3	6	0	1	6	6	5	1	6	0	1	1	1	1	3	1	2	1	1	0	2	1	1	0	0	0	0	0	0	0		0	0	0	0	1	1
788	3	3	3	5	2	3	5	1	3	2	3	4	3	3	3	2	6	5	5	3	3	2	1	1	2	1	1	1	0	1	1	0	0	0	2	1	1	1	1	1	0	0	1	0	1	1	1	1	1
789	0	0	0	0	0	0	0	0	0	0	0	0	0	0	0	0	6	5	5	0	5	0	1	0	0	0	0	0	1	0	0		2	0	0	0	0		0	0	0	0		0	0	0	0	1	1
790	1	2	1	6	3	0	6	1	6	0	1	5	1	1	0	1	6	3	5	1	5	2	1	0	0	1	1	1	1	2	1	1	0	1	1	0	0	1	0	0	1	0	1	0	0	0	0	0	1
791	0	0	1	5	0	0	6	0	6	0	0	6	0	0	0	1	6	6	6	0	6	0	1	1	0	1	1	0	1	0	0	0	1	0	1	0	0	0	0	0	0	0		0	0	0	1	1	1
792																																							0	0	0	0
793	1	1	1	6	1	0	6	0	6	1	0	6	0	0	1	0	6	6	6	0	6	1	1	0	0	0	0	0	0	0	0	1	1	0	0	0	0	0	0	0	0	0		0	0	0	1	0	0
794	0	0	0	6	0	0	6	0	6	0	0	6	0	0	0	0	6	6	6	0	6	0	0	0	0	0	0	0	0	0	0	3	3	0		0		0	0	0	0	0			0	0	0	0	0
795	5	5	6	6	1	3	6	5	5	4	1	4	4	5	0	3	5	5	5	3	4	6	2	1	2	1	3	2	2	2	1	0	2	1	1	0	0	0	0	0	0	0		0	0	0	0	0	0
796	1	3	0	5	1	3	6	1	5	0	3	5	0	2	0	5	6	5	4	1	3	0	1	0	0	0	2	1	1	0	1	0	1	0	0	1	0	0	0	0	0	0		0	0	0	0	1	1
797	0	1	0	6	0	0	6	0	6	0	1	6	0	0	1	0	6	5	6	0	5	0	1	0	0	0	1	0	0	1	0	0	0	0	0	0	0	0	0	0	0	0		0	0	0	0	0	0
798	1	1	1	6	5	1	6	0	0	3	1	6	3	0	1	1	5	6	6	1	6	6	1	0	0	0	0	1	1	1	1	1	3	0	1	0	0	0	0	0	0	0		0	1	1	1	1	1
799	3	3	1	6	1	1	6	1	6	0	0	5	1	3	0	1	6	6	6	1	5	5	1	0	1	0	3	1	1	1	1	0	3	1	1	0	0	1	0	1	0	0	1	0	0	0	0	0	0
800	6	6	5	6	0	0	6	5	6	0	0	0	0	5	0	0	6	6	6	5	6	0	3	1	3	0	3	2	3	3	3	2	2	1	2	0	0	0	0	0	0	0		1	0	0	0	0	0
801	5	5	1	6	1	1	6	3	3	0	0	5	0	3	0	1	6	6	6	3	6	0	1	1	0	1	2	1		1	1	0	0	1	0	0	0	0	0	0	0	0		0	0	0	0	1	1
802	3	3	3	4	1	3	4	3	4	4	1	4	3	3	2	0	4	0	4	2	4	0	1	0	1	1	2	1	1	1	1	1	1	1	1	1	0	0	0	0	0	0		0	0	0	0	1	1
803	1	0	1	5	0	0	1	0	4	0	0	5	0	0	1	0	6	6	3	1	5	0	1	0	0	0	2	1	2	1	0	0	1	0	0	0	0	0	0	0	0	0		0	0	0	0	1	1
804	1	3	1	6	0	0	5	0	6	0	0	5	1	2	1	1	5	6	6	1	5	0	1	0	1	0	1	0	1	1	1	0	2	0	1	0	0	0	0	0	0	0		0	1	0	1	1	1
805	4	4	3	4	2	2		1	4	5	4	4	5	5	4	1	5	4	2	3	5	1	2	1	2	1	2	1	1	2	1	1	1	2	0	1	0	0	0	0	0	0		0	0	0	0	0	1
806	5	5	5	5	0	1	6	5	6	0	0	5	4	5	0	0	6	5	6	4	4	0	1	0	1	0	3	1	2	1	1	2	2	1	1	1	0	0	0	0	0	0		0	1	0	0	1	0
807	0	0	1	0	0	1	6	1	4	0	1	6	0	1	0	1	6	6	5	1		0	0	0	0	0	2	1	2	0	0	0	0	0	1	3	0	0	0	0	0	0		0	0	0	0	0	1
808	1		0	6	0	1	1	0	6	0	1		1	0	0	0	6	6	6		6	0	1	0	1	0	1	0	2	0	0	0	1		1	0	0	0	0	0	0	0		0	0	0	0	1	1
809	0	1	0	6	0	0	6	0	6	0	0	6	0	0	0	0	6	6	6	0	6	0	1	0	1	0	0	0	1	1	0	0	0	0	0	0	0	0	0	0	0	0		0	0	0	0	0	1
810	3	4	5	6	1	2	6	1	6	0	0	5	1	1	2	1	6	5	6	1	6	3	2	0	1	0	2	1	2	1	1	1	1	1	1	0	0	0	0	0	0	0		0	1	0	0	0	1
811	4	3	5	6	5	1	5	5	5	5	5	2	6	3	5	3	5	6	4	5	5	5	2	2	1	2	3	2	2	2	0	0	1	2	1	0	0	0	0	0	0	0		0	0	0	0	0	1
812	5	5	3	6	1	3	6	5	5	0	0	4	1	6	1	3	6	6	6	5	5	3	2	1	2	1	3	1	1	1	3	2	2	0	1	0	0	1	0	0	1	1	1	0	1		0	0	1
813	0	0	0	6	0	0	6	0	5	0	0	6	0	0	1	0	6	6	6	1	6	1	1	0	0	0	1	0	0	1	0	0	0	0	0	1	0	0	0	0	0	0		0	0	0	0	1	1
814	3	3	6	5	3	4	6	0	4	5	6	3	6	6	3	5	6	4	5	6	6	0	3	1	2	2	3	2	3	2	2	2	2	1	0	1	0	1	0	0	1	0	1	0	0	0	0	0	1
815	2	5	5	4	3	4	4	3	2	2	2	2		1	2	3	3	3	3	2	3	1	3	1	1	2	3	2	2	2	3	1	3	1	1	2	0	0	0	0	0	0		1	0	0	0	1	0
816	2	4	0	6	1	1	6	1	6	0	0	6	0	2	0	0	6	6	5	1	6	0	2	0	1	0	2	0	1	1	1	0	0	0	1	0	0	0	0	0	0	0		0	0	0	0	0	1
817	5	5	5	3	5	5	6	5	1	6	6	1	6	6	5	5	2	1	0	5	6	1	1	1	0	1	1	2	1	2	0	0	0	1	0	0	0	0	0	0	0	0		0	0	0	0	0	0
818	1	5	4	5	3	3	6	1	5	0	0	5	0	3	0	0	5	6	5	1	6	0	1	2	0	1	2	1	2	1	0	0	0	1	0	0	0	0	0	0	0	0		0	1	0	0	1	1
819	1	5	4	5	3	3	6	1	5	0	0	5	0	3	0	0	5	6	5	1	6	0	1	2	0	1	2	1	2	1	0	0	0	1	0	0	0	0	0	0	0	0		0	1	0	0	1	1
820	3	3	3	3	3	2	6	3	5	0	1	3	3	4	4	1	5	4	3	4	5	1	2	2	2	1	2	2	2	2	1	1	2	1	1	0	1	1	0	0	1	0	2	0	0	0	0	0	0
821	3	2	3	3	0	1	6	2	6	3	5	5	1	1	0	1	6	6	6	1	3	0	2	1	0	0	1	1	2	1	1	1	3	1	1	1	0	0	0	0	0	0		1	1	0	0	1	1
822	5	5	6	6	5	5	5	6	4	6	5	1	5	5	5	4	6	5	3	5	5	5	3	2	3	2	3	2	2	2	2	1	2	2	2	1	0	1	0	0	1	0	1	0	0	0	0	0	0
823	6	5	4	6	0	5	6	6	6	0	0	3	5	6	0	0	6	5	5	6	6	0	2	1	2	2	2	1	2	3	2	0	2	1	0	0	0	0	0	0	0	0		0	0	0	0	1	1
824	5	3	5	6	0	1	6	4	5	0	0	0	5	3	0	0	6	6	3	4	5	0	2	3	2	1	3	2	3	0	3	1	2	2	2	3	0	1	0	0	1	0	1	0	0	0	0	0	1
825	3	3	2	6	3	1	5	1	5	5	5	3	3	3	1	1	5	5	3	1	1	0	1	2	1	0	3	1	2	1	1	1	2	0	0	1	0	0	0	0	0	0		0	0	0	0	1	1
826	3	5	3	6	1	6	6	3	6	0	0	5	5	0	1	0	6	6	3	2	5	1	1	1	1	0	2	0	1	1	0	1	0	1	1	0	0	0	0	0	0	0		1	1	1	0	0	1
827	5	5	5	3	3	1	6	0	5	0	6	6	0	5	1	3	6	6	6	1	1	0	2	2	1	1	3	0	3	1	1	0	3	0	0	0	0	1	1	1	0	0	1	0	0	0	0	1	1
828	1	3	3	6	0	1	6	1	5	1	1	5	1	3	0	1	6	5	6	1	4	0	1	1	0	0	1	1	0	0	0	0	0	0	0	0	0	0	0	0	0	0		0	0	0	0	1	1
830	3	3	5	6	0	3	6	1	5	0	0	2	0	2	0	0	6	5	5	1	0	0	2	1	0	0	1	1	1	1	0	1	0	0	1	0	0	0	0	0	0	0		0	1	1	1	0	1
831	1	3	3	6	2	2	6	0	6	0	0	6	0	5	1	1	6	6	6	1	1	0	1	0	0	1	1	0	1	1	0	0	2	1	0	0	1	1	1	1	0	0	1	0	1	0	1	1	1
832	5	6	5	5	4	5	6	5	5	4	5	4	5	6	5	5	5	6	5	6	5	4	3	1	3	1	3	1	2	1	2	0	1	2	2	1	0	1	1	0	1	0	1	0	0	0	0	1	0
833	6	5	3	6	3	4	6	2	5	0	1	3	1	5	3	2	5	4	5	5	5	4	3	1	0	1	3	2	2	1	0	0	1	1	1	2	0	1	0	0	0	1	1	0	0	0	0	1	0
834	4	1	5	6	0	0	6	3	5	0	0	1	6	6	0	5	6	6	6	5	6	0	3	0	0	0	2	1	1	1	1	0	0	0	0	0	0	0	0	0	0	0		1	0	0	0	1	1
835	3	3	5	5	6	6	5	1	1	6	5	3	6	5	6	5	5	3	0	3	3	1	2	0	0	1	1	2	2	0	0	2	3	1	0	1	0	0	0	0	0	0		0	1	0	0	1	1
836	3	5	5	5	6	5	5	3	5	6	0	3	6	6	6	5	5	5	5	5	5	5	2	1	1	2	3	2	1	1	1	2	1	1	1	1	0	0	0	0	0	0		0	0	0	0	0	0
837	1	1	1	6	1	1	5	1	4	3	2	3	3	3	1	3	3	3	3	1	3	3	1	0	2	1	2	1	1	1	1	0	0	1	1	0	0	0	0	0	0	0		0	1	1	1	1	1
838	0	0	0	6	0	0	0	0	6	0	0	6	0	0	0	0	6	6	6	0	6	0	1	0	0	0	1	0	1	1	0	0	0	0	0	0	0	0	0	0	0	0		0	0	0		0	1
839	1	1	1	6	0	0	6	1	6	0	1	3	1	1	0	0	6	6	1	1	6	0	2	1	3	1	3	1	2	0	1	0	3	0	1	0	0	0	0	0	0	0		0	0	0	0	0	1
840																																							0	0	0	0
841	5	4	1	5	5	0	6	2	5	6	6	5	6	5	0	3	6	5	5	5	5	5	3	1	3	1	3	1	2	1	3	0	2	2	2	0	0	0	0	0	0	0		0	0	0	0	1	1
842	3	3	5	3	3	3	3	3	3	3	0	0	3	2	0	3	3	3	0	1	0	0	3	2	1	1	1	2	1	1	2	1	1	1	2	2	0	0	0	0	0	0		1	0	0	0	0	1
843	5	6	5	6	3	5	6	5	3	2	2	0	6	5	3	5	5	6	3		1	0	3	1	3	1	3	2	2	2	2	2	1	1	1	1	0	0	0	0	0	0			1	0	0	0	0
844	4	3	5	6	3	0	6	3	3	1	0	3	5	3	0	1	6	6	6	4	1	0	2	0	2	1	3	1	2	2	3	2	1	1	2	0	0	0	0	0	0	0		0	0	0	1	0	1
845	5	5	6	6	3	3	5	5	5	5	6	2	3	3	3	3	5	5	3	5	4	5	2	1	2	2	2	2	2	2	2	2	2	1	1	1	0	0	0	0	0	0		1	1	0	0	0	1
846	6	5	5	6	5	3	3	4	3	5	0	5	5	5	3	5	6	6	5	5	5	5	1	0	2	0	3	1	1	1	1	2	3	1	1	0	0	0	0	0	0	0		0	0	0	1	1	1
847	6	6	6	5	5	5	5	6	5	3	6	0	5	6	3	0	6	6	6	6	5	0	3	3	3	2	3	2	2	3	3	1	3	2	2	2	1	1	0	0	1	0	1	1	0	1	0	0	1
848	1	1	0	6	3	1	6	0	6	0	0	6	0	1	3	0	6	6	6	1	5	0	2	0	2	0	2	1	1	1	1	0	0	0	1	0	0	0	0	0	0	0		0	0	0	0	1	1
849	6	6	6	6	0	5	5	4	6		0	5	6	5	0	5	6	6	5	3	0	1	2	2	3	2	3	2	3	1	2	0	3	1	2	1	0	0	0	0	0	0		0	0	0	0	1	1
850	2	2	3	4	3	3	6	1	6	1	1	5	2	3	2	1	6	6	6	0	6	1	1	0	0	0	1	1	2	1	1	0	2	0	0	1	0	0	0	0	0	0		0	1	0	0	1	1
851	1	3	1	5	1	1		0	5		1	4	0	1	0	1	5	3	3	0	5	1	1	1	0	0	1	1	1	1	0	0	2	1	0	1	0	0	0	0	0	0		0	0	0	0	1	1
852	5	6	0	5	3	5	6	3	3	3	5	6	5	6	3	2	6	5	1	5	6	6	2	0	0	0	1	1	1	1	1	0	0	0	0	1	0	1	0	0	1	0	1	0	0	0	0	1	1
853	1	1	1	1	0	3	6	1	5	0	0	1	1	1	0	0	6	5	5	0	6	0	1	0	0	0	1	0	1	1	0	0	3	0	0	0	0	0	0	0	0	0		0	0	0	0	1	1
854	6	6	6	6	6	6	6	5	5	6	3	3	5	5	5	5	4	6	4	6	5	5	2	1	1	2	2	2	2	2	0	1	1	1	1	1	0	0	0	0	0	0		1	0	0	0	1	1
855	1	1	1	3	3	3	6	1	5	0	0	5	0	1	1	1	5	5	5	0	3	0	1	0	0	0	2	1	2	1	0	0	1	0	0	0	0	0	0	0	0	0		0	1	0	0	1	1
856	1	1	0	6	0	0	6	0	6	0	4	6	2	3	3	1	6	6	6	0	6	0	1	1	1	1	1	1	1	1	1	0	0	0	1	0	0	0	0	0	0	0		0	1	0	0	0	1
857	5	5	5	5	0	1	6	3	6	0	0	5	5	6	0	0	6	6	6	5	6	1	3	1	1	0	3	1	2	0	2	0	2	0	2	0	0	0	0	0	0	0		0	0	0	1	0	1
858	1	1	1	3	2	3	5	0	6	3	1	5	0	3	1	0	6	6	6	0	6	1	1	0	0		1	0	1	1	1	0	3	0	0	0	0	0	0	0	0	0		0	1	0	0	1	1
859	0	5	0	6	5	1	5	0	5	6	6	6	6	5	5	5	6	5	3	0	4	3	1	1	0	0	1	0	0	1	0	0	0	0	1	0	0	0	0	0	0	0		0	0	0	0	0	0
860	5	5	5	5	0	1	5	3	3	0	0	3	3	5	1	1	5	6	5	3	3	1	2	1	2	1	3	1	3	2	1	0	1	1	1	1	0	0	0	0	0	0		1	0	0	0	0	1
861	1	1	1	6	3	1	5	1	3	2	2	3	1	2	0	1	6	6	5	1	5	5	1	0	1	1	2	1	1	1	1	0	2	0	2	0	0	0	0	0	0	0		0	0	0	0	0	1
863	0	1	1	4	1	1	4	0	5	0	1	6	0	0	0	0	6	5	5	1	6	0	1	1	0	0	0	0	1	1	0	0	1	0	0	0	0	0	0	0	0	0		0	0	0	0	1	1
864	1	1	0	6	0	0	6	1	5	1						0	6	5	5	1	5	0	1	1	2	0	2	1	1	1	1	0	1	0	1	0	0	0	0	0	0	0		0	0	0	0	0	1
865	6	6	6	6	5	6	5	5	3	5	0	3	5	5	1	5	6	6	6	6	0	0	3	3	3	2	3	2	2	3	3	1	3	2	2	0	1	1	0	0	1	1	2	0	1	0	0	0	1
866	1	1	1	6	1	1	6	0	6	2	0	6	2	3	0	1	6	6	6	0	6	1	1	0	0	0	0	0	1	0	1	0	2	0	0	0	0	0	0	0	0	0		0	0	0	0	0	1
867	0	3	5	6	4	0	6	1	6	0	0	1	3	3	1	1	6	6	3	1	6	1	1	0	1	0	2	0	2	1	1	1	2	0	0	0	0	0	0	0	0	0		0	0	0	0	0	1
868	2	1	0	5	0	2	6	0	5	0	0	5	1	1	0	2	5	4	1	0	5	1	1	0	0	0	0	0	1	1	0	0	0	0	0	0	0	0	0	0	0	0		0	0	0	0	1	1
869	5	5	5	6	4	3	6	2	5	0	0	5	1	6	5	3	6	6	6	1	6	3	1	2	2	0	2	0	2	1	1	3	2	2	1	1	0	0	0	0	0	0		0	1	0	0	0	1
870		5	3	5	5	4	5	5	4	5		4	5	6	5	5	4	3	3	5	3	5	2	1	2	1	3	2	3	2	2	2	2	1	2	2	0	0	0	0	0	0		0	0	0	0	1	1
871	3	3	4	6	6	5	6	3	5	5	4	3	6	4	5	6	5	5	2	1	5	5	3	2	1	2	3	3	3	1	2	1	3	2	1	2	0	0	0	0	0	0		0	0	0	0	0	0
872	1	1	1	6	0	1	6	1	5	0	0	5	1	1	0	1	6	6	6	1	4	0	1	0	0	0	2	0	1	1	1	0	1	0	1	0	0	0	0	0	0	0		0	1	0	0	1	1
873	3	2	3	6	1	1	5	1	6	1	1	4	2	5	3	1	6	5	6	2	5	3	2	0	0	2	3	0	3	0	1	0	3	0	0	1	0	0	0	0	0	0		0	1		0	0	1
874	3	6	6	5	3	0	5	3	3	5	6	1	3	3	3	3	5	5	6	3	5	1	2	2	1	2	3	2	2	2	1	0	1	0	1	0	0	0	0	0	0	0		0	0	0	0	1	1
875	0	0	1	4	1	0	6	0	4	1	3	6	1	0	0	0	6	6	4	0	6	0	1	0	0	0	1	0	0	1	0	0	2	0	0	0	0	0	0	0	0	0		0	0	0	0	0	1
876	5	4	4	6	0	0	6	6	5	4	0	1	4	5	4	0	5	6	3	6	4	0	2	1	0	1	3	2	2	0	0	1	3	1	0	1	0	0	0	0	0	0		0	0	0	0	0	1
877	6	6	5	4	5	5	5	4	3	5	5	2	6	6	5	6	3	3	3	6	4	5	2	2	3	2	3	2	3	3	2	1	2	2	3	2	0	1	0	1	0	0	1	0	1	1	0	1	1
878	1	3	1	1	1	1	3	1	5	0	0	5	0	3	0	1	6	6	6	0	5	0	2	0	0	0	3	0	3	1	1	0	3	1	1	1	0	0	0	0	0	0		0	0	0	0	1	1
879	0	0	0	6	5	0	5	0	5	0	0	6	0	0	0	0	5	6	6	0	5	1	1	0	0	0	0	0	0	1	0	0	0	0	0	0	0	0	0	0	0	0		0	0	0	0	0	0
880	1	1	1	1	1	0	5	0	5	0	1	5	1	1	0	0	5	5	4	0	5	0	1	0	0	0	2	1	1	1	1	0	1	0	0	0	0	0	0	0	0	0		0	0	0	0	1	1
881	3	6	4	6	3	0	6	3	3	3	0	3	3	5	3	3	6	5	4	4	6	0	1	1	0	0	1	0	2	1	0	0	1	0	0	1	0	1	0	0	0	1	1	0	0	0	0	0	0
882	4	4	5	6	0	6	6	4	5	1	0	4	6	5	1	6	6	3	4	4	5	5	2	1	2	2	2	2	3	1	1	0	3	1	1	1	0	0	0	0	0	0		0	1	0	0	1	1
883	6	6	6	0	0	1	6	6	6	6	6	6	6	6	6	1	6	6	6	6	6	6	2	1	3	2	3	2	3	2	3	0	3	1	2	2	0	0	0	0	0	0		0	0	0	0	0	0
884	6	6	6	6	5	5	6	6	5	3	2	4	2	6	4	5	5	4	5	4	5	3	3	1	3	1	3	1	3	1	2	0	3	2	3	2	0	0	0	0	0	0		0	0	0	1	0	0
885	4	3	3	5	0	2	5	3	5	0	0	3	3	4	1	3	6	5	2	3	6	0	1	0	0	1	2	1	2	0	0	0	0	0	0	0	0	0	0	0	0	0		0	1	0	1	0	1
886	3	4	1	1	0	1	6	1	6	0	0	6	1	1	0	1	6	5	6	1	6	1	1	0	1	0	1	0	1	1	0	0	2	0	1	3	0	0	0	0	0	0		0	1	0	0	1	0
887	1	3	3	6	1	3	6	0	6	6	0	6	2	3	0	1	5	6	6	1	5	1	1	0	1	0	2	0	1	1	1	0	1	0	1	0	0	0	0	0	0	0		0	0	0	0	0	1
888	5	5	3	4	1		6	1	6	0	3	2	0	5	0	0	6	6	6	1	6	3	1	1	2	0	2		2	0	0	0	0	2	1	3	0	0	0	0	0	0		0	0	0	0	0	1
889	1	1	1	6	3	1	6	1	6	0	3	6	1	1	5	0	6	6	6	1	5	0	1	0	1	0	0	1	1	0	1	0	0	0	0	0	0	0	0	0	0	0		0	1	0	0	0	1
890	1	2	3	5	1	0	6	0	3	5	2	4	5	1	1	1	5	5	1	1	5	5	1	2	0	2	2	1	1	1	1	1	2	2	0	1	0	0	0	0	0	0		0	0	0	0	1	1
891	3		3	6	1	0	6	1	6	0	0	6		1	6	1	6	6	5	0	6	3	1	0	0	0	2	0	0	1	1	0	3	0	1	0	0	0	0	0	0	0		0	0	0	0	1	1
892	3	3	3	3	3	1	3	1	0	3	3	6	3	3	3	3	3	3	3	1	3	1	1	1	2	0	3	0	1	1	0	0	0	0	1	0	0	0	0	0	0	0		0	0	0	0	1	1
893	4	6	2	6	0	5	6	2	5	0	2	5	4	4	1	0	5	5	5	4	3	4	2	0	3	0	3	0	2	1	2	0	1	0	2	0	0	1	0	1	1	0	1	0	1	0	0	0	1
894	1	1	1	5	1	1	5	0	1	1	1	3	5	0	1	0	5	3	1	0	3	0	1	0	1	2	2	2	3	1	0	1	1	2	1	0	0	0	0	0	0	0		0	0	0	0	1	1
895	1	6	3	6	5	5	5	1	5	3	1	5	4	5	0	5	6	6	6	1	2	0	2	0	0	1	2	1	2	1	2	0	2	1	1	0	0	0	0	0	0	0		0	1	1	0	1	1
896	5	5	5	6	0	6	6	6	6	0	5	4	6	5	0	1	6	6	6	5	6	0	2	1	3	1	3	1	1	1	3	0	3	0	1	0	0	0	0	0	0	0		0	0	0	0	1	1
897	6	6	6	6	6	6	6		5	0	6	2	6	6	0	5	5	3	6	6	5	5	3	2	3	3	3	2	3	3	3	0	3	2	3	2	0	0	0	0	0	0		0	0	0	0	0	0
898	0	0	3	6	0	3	6	0	6	0	0	6	0	0	0	0	0	6	6	0	6	0	1	0	0	0	2	0	1	0	0	0	1	0	1	0	0	0	0	0	0	0		0	0	1	1	1	1
899	0	0	3	6	0	3	6	0	6	0	0	6	0	0	0	0	0	6	6	0	6	0	1	0	0	0	2	0	1	0	0	0	1	0	1	0	0	0	0	0	0	0		0	0	1	1	1	1
900	0	0	3	6	0	3	6	0	6	0	0	6	0	0	0	0	0	6	6	0	6	0	1	0	0	0	2	0	1	0	0	0	1	0	1	0	0	0	0	0	0	0		0	0	1	1	1	1
901	1	3	3	3	1	0	6	1	5	0	1	5	0	1	0	0	0	0	0	1	5	0	1	0	2	1	1	1	2	1	1	0	3	1	1	1	0	1	0	0	1	0	1	0	0	0	0	0	1
902	4	5	5	5	1	5	6	1	5	1	5	5	5	5	1	1	5	5	5	6	0	1	3	0	1	1	2	1	2	1	1	0	3	2	1	2	0	0	0	0	0	0		1	0		0	0	1
903	0	0	0	6	0	0	6	0	6	0	0	5	5	0	0	0	0	5	5	0	5	0	1	0	0	0	1	1	1	0	0	0	2	0	0	0	0	0	0	0	0	0		0	0	0	0	0	0
904	1	3	3	5	0	0	5	3	6	0	0	3	1	5	0	0	6	5	5	1	6	1	2	1	1	0	2	1	1	2	1	0	0	1	1	0	0		0	0	0	0		0	0	0	1	0	1
905	4	2	3	5	1	1	6	3	4	0	2	5	1	4	1	0	6	6	5	4	5	1	2	1	1	1	2	1	2	1	1	0	3	1	0	2	0	0	0	0	0	0		0	1	0	0	1	1
906	5	5	1	1	0	1	6	0	6	1	3	6	1	1	1	1	6	6	6	0	6	3	1	0	0	0	1	1	2	1	0	0	0	0	0	1	0	0	0	0	0	0		0	1	0	0	1	1
907	5	3	5	2	3	2	5	2	2	4	4	2	5	4	4	3	3	3	2	4	2	4	2	1	2	1	2	1	2	2	2	1	1	2	2	1	0	0	0	0	0	0		0	0	0	1	0	1
908	5	3	5	2	3	2	5	2	2	4	4	2	5	4	4	3	3	3	2	4	2	4	2	1	2	1	2	1	2	2	2	1	1	2	2	1	0	0	0	0	0	0		0	0	0	1	0	1
909	1	1	1	1	1	0	6	1	5	0	0	5	1	1	0	0	6	6	5	0	5	0	1	0	0	0	0	0	2	0	0	0	2	0	1	0	0	0	0	0	0	0		0	1	0	0		1
910	3	3	3	5	4	3	6	3	5	4	6	3	3	3	3	2	6	5	5	1	2	2	1	1	1	2	2	2	2	1	1	0	1	1	0	1	0	0	0	0	0	0		0	0	0	0	0	0
911	0	1	0	2	0	1	5	1	6	0	1	5	0	1	1	0	5	5	5	1	5	0	1	0	1	1	1	1	1	1	1	0	2	0	0	0	0	0	0	0	0	0		0	0	0	0	1	1
912	0	0	0	6	0	5	6	0	6	0	6	6	0	0	0	5	5	5	5	0	6	2	1	0	0	0	1	0	1	1	0	0	0	0	0	0	0	0	0	0	0	0		0	0	0	0	1	1
913	3	3	3	5	3	0	6	1	6	0	0	5	0	6	1	1	6	6	6	3	3	0	2	1	2	2	2	1	2	2	1	0	0	2	0	1	0	1	1	1	0	0	1	1	1	0	1	1	1
914	3	3	3	6	1	3	6	3	5	2	4	5	3	3	3	3	6	6	5	3	4	1	1	1	0	1	2	1	1	1	1	0	1	1	0	0	0	0	0	0	0	0		0	0	0	0	0	1
915	1	1	1	2	0	0	0	0	3	0	4	4	1	1	1	1	4	5	4	0	6	1	1	0	1	0	2	1	2	1	0	0	3	1	1	2	0	0	0	0	0	0		0	0	0	0	1	1
916	3	3	1	5	3	0	6	0	5	0	0	5	3	0	0	1	5	6	6	1	4	1	1	0	1	0	2	1	1	1	1	0	1	0	1	0	0	0	0	0	0	0		0	0	0	0	1	1
917	1	1	1	3	1	1	6	1	5	1	1	6	0	1	1	0	6	6		1	6	0	1	0	0	0	1	0	2	0	0	0	2	0	0	0	0	0	0	0	0	0		0	0	0	0	0	1
918	1	3	3	3	6	3	5	1	1	5	5	1	3	5	6	4	1	3	0	1	0	0	2	0	1	1	3	1	1	1	0	0	2	0	0	0	0	0	0	0	0	0		0	0	0	0	1	1
919	1	1	1	6	0	1	6	0	3	0	1	5	3	1	0	0	6	5	3	1	1	1	1	0	0	0	2	0	1	1	0	0	0	0	0	0	0	0	0	0	0	0		0	0	0	0	0
920	1	3	3	6	1	3	6	1	6	0	0	5	3	6	1	0	6	5	5	1	5	1	1	0	2	0	0	0	1	1	0	1	1	0	0	0	0	0	0	0	0	0		0	0	0	1	1	1
921	3	4	6	6	2	2	6	2	5	3	3	2	0	5	4	2	5	5	5	4	5	3	1	0	2	1	2	2	2	1	1	2	3	0	1	1	0	0	0	0	0	0		0	0	0	0	1	1
922	1	4	5	5	1	5	6	3	5	0	0	3	5	1	3	2	6	5	3	1	6	0	2	1	2	1	2	1	3	1	0	1	3	1	0	2	0	1	0	0	1	0	1	0	0	0	0	0	1
923	5	5	6	1	6	1	1	5	1	6	6	1	6	6	3	3	2	1	2	5	1	1	3	3	3	2	3	2	2	3	3	1	3	2	2	1	0	1	0	0	1	0	1	1	0	0	0	0	0
924	1	1	1	1	0	0	6	1	6	0	0	5	1	1	1	0	5	5	5	0	5	0	1	0	0	0	1	0	1	1	0	0	0	0	0	1	0	0	0	0	0	0		0		0	0	1	1
925	3	3	5	6	3	1	5	1	6	0	0	5	1	5	4	2	6	5	5	3	5	1	2	1	1	1	2	1	1	1	1	0	2	1	1	1	0	0	0	0	0	0		1	0	0	0	1	1
926	0	1	1	3	2	1	5	0	4	0	0	5	1	1	3	1	5		3	0	1	1	2	1	0	2	3	1	1	1	1	0	2	2	0	0	0	0	0	0	0	0		0	0	0	0	1	1
927	1	3	3	5	3	1	6	1	3	0	1	2	3	3	3	1	6	4	5	1	5	1	1	2	0	0	1	1	1	1	0	1	1	2	0	1	0	0	0	0	0	0		0	0	0	0	1	1
928	0	0	0	0	0	0	4	0	4	0	0	5	0	0	1	1	6	3	2	0	5	1	0	0	0	0	1	0	1	0	0	0	0	0	0	1	0	0	0	0	0	0		0	0	0	0	1	1
929	0	1	0	0	0	0	5	0	1	0	0	0	1	1	1	1	3	0	3	0	0	3	1	1	1	1	2	1	2	1	1	3	0	0	1	0	0	0	0	0	0	0		0	1	0	0	0	1
930	0	1	1	6	0	1	6	0	5	0	1	5	1	0	0	0	5	5	5	0	3	1	1	0	1	0	0	1	1	1	0	0	2	0	0	0	0	0	0	0	0	0		0	0	0	0	1	1
931	5	6	6	6	5	5	3		0	3	1	0	3	3	3	3	3	5	5	6	3	1	3	1	3	1	3	2	2	1	3	0	3	1	2	1	0	1	0	0	1	0	1	0	0	0	0	1	1
932	1	1	0	6	5	5	5	0	6	0	0	6		0	0	0	6	6	6	0	6	0	1	0	0	0	1	1	1	0	0	0	0	0	0	0	0	0	0	0	0	0		0	0	0	0	1	1
933	3	3	4	6	1	0	6	1	3	3	3	3	6	6	3	0	6	5	2	3	6	4	2	2	3	0	3	1	0	2	1	1	1	0	2	0	0	0	0	0	0	0		0	0	0	0	1	1
934	3	3	1	3	0	0	6	1	6	1	3	5	2	1	0	1	6	6	6	0	6	0	1	2	0	0	1	1	2	1	1	0	1	0	1	1	0	0	0	0	0	0		0	0	0	0	1	1
935	6	6	0		0	6	6	6	1	0	0	6	0	6	0	6	6	6	0	6	0	1	3	2	3	1		0	3	0	3	0	3	3	3	2	0	1	0	1	1	0	1	0	0	0	0	0	1
936	1	0	2	6	0	2	6	0	6	0	0	6	0	0	3	3	6	6	6	0	6	0	1	0	0	0	1	0	2	0	1	1	3	0	0	0	0	0	0	0	0	0		0	0	0	0	0	0
937	1	1	1	6	0	1	6	0	6	0	6	6	1	6	0	1		0	6	0	6	5	1	0	0	0	3	0	1	0	0	0	2	0	0	0	0	0	0	0	0	0		0	0	0	0	0	0
938	1	1	1	6	0	1	6	0	6	0	6	6	1	6	0	1		0	6	0	6	5	1	0	0	0	3	0	1	0	0	0	2	0	0	0	0	0	0	0	0	0		0	0	0	0	0	0
939	1	1	3	1	0	1	6	1	5	0	3	6	0	3	0	0	6	6	6	1	6	1	1	0	0	0	2	0	1	1	1	0	0	0	0	0	0	0	0	0	0	0		0	1	0	0	1	1
940	1	1	0	3	0	0	6	0	6	0	1	6	1	1	0	0	6	6	6	0	6	0	0	0	0	0	0	0	2	0	0	0	2	0	0	0	0	0	0	0	0	0		0	0	0	0	1	1
941	3	5	3			2	6	0	6	6	3	0	2	3	0	0	6	0	6	0	6	3	1	1	1	1	1	1	1	2	1	1	0	0	1	0	0	1	0	1	0	0	1	0	1	0	0	1	1
942	0	0	0	6	6	0	6	3	6	0	0	4	3	1	0	1	6	6	6	3	0	0	3	0	3	1	3	1	2	1	1	0	1	1	0	0	0	1	0	1	0	0	1	0	0	0	0	1	1
943	3	4	1	5	2	5	6	4	6	0	3	5	6	6	3	0	6	5	5	2	3	2	1	1	2	1	1	1	3	2	1	2	3	2	2	2		1	0	0	1	0	1	0	0	0	0	1	1
944	0	0	1	6	3	1	6	0	6	0	0	6	1	0	5	0	6	0	5	0	6	6	0	0	0	0	0	0	0	1	0	0	0	0	0	0	0	0	0	0	0	0		0	0	0	0	1	1
945	1	1	1	1	1	1	3	1	1	0	0	3	1	1	1	1	4	2	1	1	2	0	1	0	1	1	1	1	1	1	1	1	2	1	1	1	0	1	0	0	1	0	2	0	1	0	0	0	1
946	2	3	0	0	1	0	0	2	6	6	0	6	1	0	0	0	6	6	5	1	6	0	0	0	0	0	1	0	1	1	0	0	0	0	0	3	0	0	0	0	0	0		0	1	0	0	1	1
947	2	3	3	6	1	3	6	3	5	2	0	5	3		1	3	6	5	5	3	3	6	2	1	3	1	3	1	1	1		3	2	1	2	0	1	1	0	0	1	0	1	1	0	0		0	1
948	1	1	1	6	0	0	5	1	6	0	0	4	2	3	1	0	6	6	6	1	5	0	1	0	0	0	1	1	0	1	1	0	0	0	0	0	0	0	0	0	0	0		0	0	0	1	0	1
949	2	3	5	4	0	1	5	2	3	0	1	3	4	5	0	0	6	6	4	3	2	0	3	2	2	1	3	2	2	1	2	0	3	0	1	1	0	1	0	1	0	0	1	0	0	1	0
950	0	0	3	5	0	0	6	0	0	6	1	5	0	0	0	0	5	5	4	0	6	3	1	0	0	0	2	0	1	0	1	0	3	0	1	0	0	0	0	0	0	0		0	0	0	0	1	1
951	3	5	3	1	3	1	6	2	6	0	0	3	5	0	0	0	6	6	6	3	5	1	2	0	0	1	2	1	2	1	0	1	1	1	0	0	0		0	0	0	0		0	0	0	0	1	1
952	4	5	5	6	3	4	4	3	3	3	3	0	1	2	2	2	5	5	5	4	5	4	2	1	2	1	3	1	2	1	2	0	1	1	1	1	0	0	0	0	0	0		0	1	0	1	0	1
953	0	3	2	6	0	1	0	0	6	0	0	6	0	1	1	1	6	6	6	1	6	0	1	0	0	0	1	0	0	1	1	0	0	0	0	0	0	0	0	0	0	0		0	1	0	0	1	0
955	3	3	2	6	3	2	3	2	3	0	5	4	5	6	1	1	6	5	4	2	5	5	1	1	1	1	2	1	2	1	1	1	3	1	1	3	0	0	0	0	0	0		0	0	0	0	0	0
956	1	2	1	5	5	1	6	1	5	1	1	6	1	3	5	1	6	6	5	1	5	3	1	1	1	0	3	0	1	1	1	1	1	0	1	0	0	0	0	0	0	0		0	0	0	0	0	1
957	0	0	0		5	1	6	1	6	5	5	6	0	0	5	1	6	6	6	0	5	1	0	0	0	0	0	0	1	1	1	0	2	0	0	0	0	0	0	0	0	0		0	0	0	0	1	1
958	0	0	0	6	0	0	6	0	6	0	0	5	1	1	0	0	6	6	6	0	6	0	0	1	0	0	0	0	1	1	0	0	2	1	0	1	0	0	0	0	0	0		0		0	0		1
959	1	2	1	6	6	2	6	1	6	5	6	5	1	1	5	0	6	6	6	1	5	0	1	0	0	0	0	0	1	1	0	0	0	0	0	0	0	0	0	0	0	0		0	0	0	0	1	1
960	3	5	5	5	3	6	6	5	5	6	5	3	6	3	3	1	5	6	5	6	3	1	2	1	1	2	3	2	3	1	1	1	3	1		0	0	0	0	0	0	0		0	0	0	0	1	1
961	5	5	5	6	4	6	6	4	6	0	0	5	5	5	2	2	6	6	6	5	6	0	2	1	3	0	3	1	1	2	1	1	2	1	2	0	0	1	1	1	1	0	1	0	0	1	0	0
962	3	5	6	6	1	6	6	2	6	0	0	3	3	4	1	3	6	6	6	3	3	5	2	0	1	0	1	1	1	1	1	0	2	0	1	0	0	0	0	0	0	0		0	1	0	0	0	0
963	1	1	1	1	0	0	6	0	6	1	1	5	0	1	0	0	6	5	5	1	3	4	2	0	0	1	2	0	2	0	1	0	2	0	1	0	0	1	0	1	0	0	1	0	1	1	1	1	1
964	2	1	0	6	0	1	6	1	5	0	0	5	5	3	0	0	6	5	4	2	6	0	1	0	2	0	3	0	3	0	1	0	2	0	1	0	0	0	0	0	0	0		0	1	0	0	1	1
965	4	5	4	6	5	5	6	1	6	1	6	5	0	1	5	0	6	6	6	2	6	0	1	0	0	0	0	0	2	1	0	0	2	0	0	0	0	0	0	0	0	0		0	1	0	0	1	1
966	2	1	5	6	4	3	6	2	6	0	0	2	1	3	1	1	6	6	6	4	6	0	1	1	1	1	1	1	2	1	0	1	2	0	0	0	0	0	0	0	0	0		0	0	0	0		1
967	1	1	1	6	1	0	6	1	6	1	1	5	0	3	0	1	6	5	5	1	5	0	1	1	0	1	2	1	1	1	0	0	1	0	1	0	0	0	0	0	0	0		0	0	0	0	1	1
968	1	1	1	6	1	0	6	1	6	1	1	5	0	3	0	1	6	5	5	1	5	0	1	1	0	1	2	1	1	1	0	0	1	0	1	0	0	0	0	0	0	0		0	0	0	0	1	1
969	3	0	0	0	1	0	5	0	0	0	0	5	0	1	0	0	5	6	6	0	6	1	1	0	0	0	1	1	1	1	0	0	2	0	0	0	0	0	0	0	0	0		0	0	0	0	1	1
970	1	3	0	6	0	0	6	0	5	0	0	5	2	0	0	0	6	6	5	1	6		1	0	0	0	1	0	0	1	0	0	0	0	0	0	0	0	0	0	0	0		0	0	0	0	1	1
971	3	4	5	3	0	1	6	2	6	4	3	2	4	5	1	3	6	5	5	3		1	2	2	1	2	2	2	3	2	1	1	1	2	0	1	0	0	0	0	0	0		0	0	0	0	1	1
972	2	3	3	5	1	3	6	1	5	2	2	5	3	6	1	4	6	5	5	1	2	5	2	1	0	1	3	1	2	0	1	0	2	0	0	0	0	1	1	1	0	0	1	0	0	0	0	0	1
973	6	6	6	5	4	5	6	3	1	6	4	0	6	6	3	6	5	5	2	6	3	6	2	1	3	2	3	2	3	2	1	1	3	2	1	2	0	0	0	0	0	0		0	0	0	0	0	1
974	5	5	5	2	4	4	6	2	5	1	1	3	1	4	1	1	6	6	6	1	3	0	2	1	1	1	2	1	1	1	1	2	1	0	1	3	0	0	0	0	0	0		0	0	0	0	0	0
975	4	3	4	5	4	2	5	2	4	5	3	2	3	3	1	1	6	5	3	2	5	0	2	0	0	0	2	2	1	2	1	0	2	1	0	1	0	0	0	0	0	0		0	1	0	0	1	1
976	0	0	1	1	0	1	6	1	6	0	0	6	0	1	0	0	6	6	5	1	5	0	1	0	0	0	1	0	1	1	0	0	0	0	0	0	0	0	0	0	0	0		0	0	0	0	0	1
977	5	5	5	6	3	5	3	5	3	0	5	1	2	5	3	3	3	0	1	4	3	0	3	1	2	2	3	2	2	2	3	2	1	2	1	1	0	0	0	0	0	0		1	1	0	0	0	0
978	3	6	0	5	1	0	6	2	6	3	0	6	5	3	6	5	6	5	3	4	5	4	2	0	3	1	3	0	2	1	1	0	1	0	2	0	0		0	0	0	0		0	0	0	0	0	1
979	3	4	3	6	5	5	5	0	5	0	4	4	5	0	5	0	6	6	6	3	5	0	1	1	1	1	1	1	2	1	0	0	0	2	0	1	0	0	0	0	0	0		0	0	0	0	0	0
980	3	1	1	5	5	1	4	2	3	2	4	2	2	3	3	1	3	4	2	2	3	1	2	1	2	1	3	1	2	2	2	2	1	2	2	3	0	0	0	0	0	0		0	0	0	0	0	0
981	1	2	2	6	1	2	6	1	4	1	5	5	2	3	1	0	6	6	6	2	4	1	2	0	2	1	3	0	1	1	1	0	3	0	1	1	0	0	0	0	0	0		1	0	0	0	0	1
982	3	5	1	6	0	1	6	1	6	0	0	5	1	5	0	0	6	6	6	3	6	0	1	0	0	0	3	1	0	1	0	0	1	0	2	0	0		0	0	0	0		0	1	0	0	1	1
983	1	1	1	6	0	0	6	1	6	0	0	5	1	0	0	1	6	6	5	1	5	0	1	0	0	0	1	1	1	0	1	0	1	1	1	2	0	0	0	0	0	0		0	0	0	0	1	1
984	1	1	2	4	0	0	5	1	4	1	5	3	1	0	0	2	5	5	5	2	4	4	2	1	0	0	2	1	0	2	0	1	1	2	0	0	0	0	0	0	0	0		0	0	0	0	0	1
985	1	1	0	6	3	2	6	0	6	2	1	6	1	1	1	2	6	6	6	0	6	1	1	0	0	0	0	0	0	0	0	0	3	0	0	0	0	0	0	0	0	0		0	0	0	0	1	1
986	1	1	1	1	0	0	6	0	6	3	0	6	1	1	0	0	6	6	6	0	1	0	1	1	1	0	0	0	0	0	0	0	3	0	1	0	0	0	0	0	0	0		0	0	0	0	1	1
987	1	5	3	5	1	1	6	1	5	0	0	5	0	5	0	1	6	6	5	1	5	1	1	0	1	0	3	0	1	1	2	1	1	0	2	0	0	0	0	0	0	0		1	0	0	0	1	1
988	1	1	3	1	4	4	6	1	5	4	5	5	1	3	3	1	6	6	5	3	2	3	1	1	2	1	1	1	1	2	1	1	2	2	1	0	0	0	0	0	0	0		0	1	0	0	1	0
989	0	1	1	6	0	0	6	0	3	0	0	6	0	0	1	0	6	6	3	0	6	0	1	0	0	0	1	0	1	1	0	0	0	0	0	0	0	0	0	0	0	0		0	1	0	0	1	1
990	1	1	1	2	3	0	6	0	6	0	3	5	1	1	1	1	6	6	6	1	5	0	2	0	1	1	3	0	3	1	1	0	2	1	0	2	0	1	1	0	0	0	1	0	1	0	0	1	1
991	3	1	3	5	0	1	6	3	4	3	3	4	3	3	1	3	5	4	3	3	5	0	2	1	1	1	2	2	2	1	1	0	1	1	1	0	0	0	0	0	0	0		0	0	0	0	1	1
992	0	1	6	6	0	3	6	1	1	6	0	2	2	1	5	2	5	5	4	1	6	6	2	1	2	1	3	2	2	2	2	0	3	1	1	1	0		0	0	0	0		0	0	0	0	0	1
993	2	1	1	6	3	1	6	0	3	0	2	5	1	1	1	0	6	6	5	1	4	0	1	0	1	0	2	0	2	0	1	0	3	1	1	3	0	0	0	0	0	0		0	0	0	0	0	0
994	1	1	3	3	2	2	4	1	1	3	0	1	3	5	2	1	4	4	4	1	1	2	2	3	1	1	1	1	2	1	0	1	1	2	1	1	0	0	0	0	0	0		0	1	0	0	1	1
995	5	5	6	6	6	5	6	6	0	6	6	6	6	6	6	6	1	5	2	6	6	5	3	0	0	2	3	2	3	0	1	0	1	3	2	0	0	1	0	0	1	0	1	1	0	0	0	1	1
996	1	1	1	2	3	1	4	1	5	0	0	3	1	3	3	1	6	6	5	1	1	1	2	0	2	0	3	1	1	1	1	0	2	2	1	0	0	0	0	0	0	0		1	0	0	0	1	1
997	1	1	3	6	1	0	6	0	6	1	1	5	1	1	0	1	6	6	6	0	6	1	1	0	0	0	1	0	1	1	1	0	2	0	0	0	0	0	0	0	0	0		0	1	0	0	1	1
998	3	4	5	6	1	1	6	1	6	0	1	5	0	0	0	1	6	4	5	5	5	3	1	0	0	1	2	1	2	1	0	0	1	2	0	0	0	0	0	0	0	0		0	0	0	0	1	1
999	3	5	6	6	5	3		5	1	6	6	0	1	3	4	1	5	3	2	5	6	1	3	2	0	1	2	2		3	1	1	0	2	1	0	1	1	0	0	0	1	2	0	0	0	0	1	1
1000	3	3	3	3	3	3	5	2	1	5	5	5	1	2	3	1	6	3	3	1	3	1	1	1	2	0	2	0	2	0	1	0	3	0	1	0	0	0	0	0	0	0		0	1	0	0	1	1
1001	1	1	2	3	0	1	6	0	6	0	1	6	1	1	2	1	5	6	6	0	4	0	1	0	1	0	1	0	2	1	1	0	1	0	0	1	0	0	0	0	0	0		0	0	0	0	0	1
1002	3	3	3	6	3	3	6	1	5	0	0	4	1	3	0	0	6	6	5	0	6	0	1	0	1	0	1	0	1	1	0	0	1	0	0	0	0	0	0	0	0	0		0	0	0	0	0	0
1003	3	3	1	6	3	0	5	3	3	3	3	3	1	1	1	3	3	3	1	1	1	1	2	1	1	1	3	2	2	1	2	0	0	1	2	1	1	1	0	1	1	0	2	0	0	0	0	0	0
1004	5	5	5	4	5	5	6	4	5	5	5	4	3	5	3	5	5	5	5	4	3	4	3	2	1	1	2	1	2	1	3	1	3	1	1	1	0	0	0	0	0	0		0	0	0	0	0	0
1005	1	2	1	2	1	0	6	1	6	2	1	6	0	1	0	0	6	6	5	0	6	0	1	0	0	0	0	1	1	1	1	0	0	0	1	0	0	0	0	0	0	0		0	0	0	0	0	1
1006	5	4	3	5	6	6	5	5	3	5	6	5	5	4	5	5	3	3	2	3	6	2	2	0	1	0	2	1	1	1	0	0	2	0	1	0	0	0	0	0	0	0		0	1	1	0	1	1
1007	0	0	0		1	0		1	6	1	1	5	1	1	1	1	6	6	6	0	5	0	1	1	2	1	2	1	2	1	1	0	1	1	1	1	0	0	0	0	0	0		0	1	0	0	1	1
1008	3	3	3	3	1	3	6	2	3	1	1	4	1	3	1	3	5	4	3	1	3	1	2	1	1	1	3	1	1	1	2	0	1	1	1	1	0	0	0	0	0	0		0	1	0	0	0	1
1009	5	5	6	6	5	2	6	3	6	0	5	3	3	5	0	0	6	6	6	4	6	0	2	2	3	2	3	1	3	2	3	0	3	1	3	3	0	0	0	0	0	0		0	0	0	0	1	0
1010	3	4	2	6	1	4	6	0	6	2	0	3	3	6	0	4	6	6	6	3	6	3	2	0	0	0	0	0	1	0	1	0	0	1	1	0	0	0	0	0	0	0		0	1	0	0	1	1
1011	1	0	0	6	0	0	6	0	6	0	3	6	1	3	6	0	6	6	6	0	5	0	1	1	0	0	1	0	1	1	0	0	3	0	0	0	0	0	0	0	0	0		0	0	0	0	1	1
1012	0	1	1	1	0		6	1	6		1	6	1	1	0	0	6	6	6	1	5	0	1	1	1	0	2	1	1	1	0	0	1	0	1	3	0	0	0	0	0	0		0	0	0	0	1	1
1013	0	0	0	1	0	3		0	6	1	2	5	2	0	1	1	6	6	5	0	4	1	1	0	1	0	1	0	1	1	1	0	2	1	1	0	0	0	0	0	0	0		0	0	0	0	1	1
1014	1	3	4	5	3	0	6	0	5	0	1	5	2	4	3	5	6	5	5	1	6	5	1	0	1	1	3	1	0	1	3	0	2	0	0	0	0	0	0	0	0	0		0	0	0	0	1	0
1015	1	1	1	6	1	0	6	0	6	1	1	5	1	0	0	1	3	1	3	1	3	0	1	1	0	0	1	0	1	1	0	0	0	0	0	1	0	0	0	0	0	0		0	0	0	0	0	0
1016	3	3	3	6	0	0	5	1	4	0	0	5	1	0	1	1	6	6	4	1	5	1	2	1	1	1	2	1	2	2	1	0	1	1	1	0	0	0	0	0	0	0		0	1	0	1	1	1
1017	0	0	0	1	0	1	6	0	3	0	1	5	0	0	0	1	2	5	3	0	1	1	1	0	0	0	0	0	1	1	0	0		0	0	0	0		0	0	0	0		0	0	0	0	0	1
1018	3	3	4	6	3	2	6	0	5	2	2	3	3	3	0	4	6	5	5	1	5	4	1	0	0	1	1	1	2	1	1	1	3	1	1	1	0	0	0	0	0	0		0	0	0	0	0	1
1019	1	1	0	6	0	0	6	1	1	0	0	5	0	0	0	0	6	1	5	1	5	0	1	1	0	0	3	1	2	0	1	0	2	0	1	0	0	1	0	0	0	1	2	0	0	0	0	1	1
1020	0	1	0	6	0	1	6	0	6	0	0	5	1	1	1	1	6	6	6	1	6	1	0	0	0	0	1	0	0	1	1	0	0	0	1	0	0	0	0	0	0	0		0	1	0	0	1	1
1021	1	0	1	2	2	2	6	0	5	0	0	4	2	0	0	3	4	4	5	0	5	4	1	0	0	0	0	0	0	1	0	0	0	0	0	0	0	0	0	0	0	0		0	0	0	1	0	0
1022	0	1	0	3	0	1	3	0	6	0	0	5	1	0	0	1	6	6	1	1	5	0	1	0	0	0	1	1	2	0	1	0	2	0	1	0	0	0	0	0	0	0		0	0	0	0	0	1
1023	1	1	1	3	3	3	6	1	6	1	1	3	1	1	1	1	6	6	5	1	3	0	1	0	1	1	2	2	3	1	1	0	3	2	1	1	0	1	0	0	1	1	1	0	0	0	0	1	0
1024	5	5	4	5	2	2	5	5	4	2	2	2	3	3	1	1	5	4	4	6	3	0	2	1		1	3	2	2	2	3	0	1	1	1	1	0	1	0	1	0	0	1	0	0	0	0	1	1
1025	0	1	0	6	0	0	6	0	5	0	0	5	1	1	0	0	6	5	6	0	6	0	1	0	0	0	1	0	0	0	0	0	0	0	0	0	0	0	0	0	0	0		0	0	0	0	0	0
1026	1	2	1	2	0	1	6	1	5	0	1	4	1	1	1	1	6	5	5	1	6	1	1	0	2	0	2	1	0	1	1	0	1	0	1	0	0	0	0	0	0	0		0	0	0	0	1	1
1027	1	2	5	4	1	3	6	1	5	0	1	1	1	1	0	1	3	6	3	1	3	1	2	1	0	0	2	1	1	2	1	0	2	0	2	1	1	1	1	1	0	0	1	0	0	1	0	1	1
1028	0	1	1	5	0	1	5	1	5	1	2	6	0	1	1	0	5	6	5	0	3	3	1	0	0	0	0	0	0	1	0	0	2	0	0	0	0	0	0	0	0	0		0	0	0	0	1	1
1029	2	4	2	6	0	3	6	0	5	1	0	5	3	1	1	3	6	6	5	0	5	5	1	0		0	2	1	1	1	1	0	1	0	1	0	0	0	0	0	0	0		0	0	0	0	0	1
1030	0	0	0	0	0	0	0	0	5	0	0	5	0	0	1	0	5	1	5	0	1	0	1	0	0	0	0	0	1	0	0	0	3	0	0	0	0	0	0	0	0	0		0	0	0	0	1	1
1031	3	2	0	5	0	6	6	1	6	3	3	5	0	0	0	5	6	6	6	0	5	0	1	1	0	0	1	0	1	1	0	0	1	0	1	0	0	0	0	0	0	0		0	0	0	0	0	0
1032	5	6	6	6	0	5	6	6	4	6	5	0	6	6	5	5	4	5	1	3	6	0	3	3	3	3	3	2	2	1		1	1	2	0	3	0	0	0	0	0	0		0	0	0	0	0	1
1033	5	5	4	4	5	5	6	6	3	6	6	3	5	6	2	3	5	6	4	6	0	2	3	2	3	1	3	2	2	1	2	1	0	1	1	0	0	0	0	0	0	0		0	0	0	0	0	1
1034	0	1	1	1	0	0	6	0	5	0	0	6	1	0	0	0	6	6	6	0	6	0	1	0	0	0	1	0	1	0	0	0	1	0	0	0	0	0	0	0	0	0		0	0	0	0	1	1
1035	6	6	6	5	5	6	6	6	6	3	3	1	6	6	1	6	6	3	6	6	5	6	3	3	3	2	3	2	3	2	3	2	3	1	3	3	0	1	1	1	0	0	1	0	0	0	0	1	1
1036	1	3	1	3	1	1	5	1	6	3	4	3	1	1	1	0	6	6	5	1	5	3	1	1	2	1	1	1	1	1	1	0	1	0	1	1	0	0	0	0	0	0		0	0	0	0	1	1
1037	1	1	1	5	5	1	6	0	5	0	0	5	1	0	4	0	6	5	5	1	5	2	1	0	0	0	2	1	1	1	1	0	1	0	0	0	0	0	0	0	0	0		0	0	0	0	1	1
1038	5	5	6		3	3	6	6	6	3	1	0	3	3	0	1	3	3	5		2	3	2	0	2	0	3	0	1	2	2	0	1	0	2	2	0	0	0	0	0	0		0
1039	5	6	5	6	0	0	0	1	6	1	0	5	5	6	0	0	6	5	5	1	5	0	1	1	0	0	3	1	1	1	0	0	0	1	0	0	0	0	0	0	0	0		0	0	0	0	0	1
1040	1	3	0	6	1	0	6	0	5	0	3	6	0	3	0	0	6	6	6	1	5	1	1	0	1	1	3	0	1	1	0	0	1	0	1	0	1	1	1	1	0	0	2	0	1	1	1	1	1
1041	1	1	2	6	0	1	6	0	6	0	0	5	2	1	0	1	6	6	5	0	6	1	1	0	1	0	1	1	2	1	1	0	2	0	0	1	0	0	0	0	0	0		0	0	0	0	1	1
1042	1	5	5	3	6	3	3	3	5	6	3	3	6	6	5	3	5	5	1	1	3	0	2	3	2	2	3	2	3	1	1	1	3	2	1	2	1	1	0	0	1	1	1	0	0	0	0	1	0
1043	1	1	1	3	0	1	6	0	5	0	0	5	1	0	0	0	6	6	6	0	6	0	1	0	0	0	1	0	1	0	0	0	0	0	0	0	0	0	0	0	0	0		0	1	0	0	1	1
1044	1	3	5	3	0	1	3	3	0	0	0	5	3	1	1	1	6	6	5	3	4	5	1	1	0	0	2	1	2	1	2	1	1	0	1	0	0	0	0	0	0	0			0	0	0	1	1
1045	1	1	3	6	5	6	6	1	3	1	0	5	5	4	0	3	5	5	5	1	4	1	1	0	0	0	1	0	1	1	1	1	2	1	2	0	0	0	0	0	0	0		0	1	0	0	1	0
1046	1	2	1	5	5	5	6	1	6	0	1	5	1	3	1	1	5	5	5	1	5	1	1	0	0	0	1	0	2	1	1	0	2	0	1	0	0	0	0	0	0	0		0	0	0	0	0	1
1047	5	5	4	6	5	4	6	4	6	4	0	4	5	5	2	3	5	5	6	2	5	0	2	1	0	1	2	1	2	1	1	0	3	1	0	0	1	0	0	0	0	0		0	0	0	1	0	1
1048	3	3	4	6	1	5	6	3	6	0	0	5	3	3	1	1	6	5	5	1	6	0	1	1	1	0	2	1	2	1	1	0	0	0	1	1	0	0	0	0	0	0		0	0	0	0	0	1
1049	0	1	5	3	0	2	6	0	5	6	0	2	0	0	6	0	0	6	6	0	6	1	1	0	0	0	1	0	1	1	1	0	2	0	0	3	0	0	0	0	0	0		0	0	0	0	0	1
1050	1	1	0	6	0	1	6	1	6	0	0	6	0	1	1	0	6	6		4	6	1	1	0	0	0	0	0	0	1	0	0	1	0	0	0	0	0	0	0	0	0		0	0	0	1	1	1
1051	6	5	6	5	5	0	6	6	5	0	0	0	6	4	0	6	5	4	1	6	3	0	3	1	3	1	3	2	3	2	3	0	3	1	3	3	0	0	0	0	0	0		0	0	0	0	0	1
1052	1	2	1	6	0	3	6	1	6	0	0	6	1	3	0	1	6	5	5	1	4	1	1	0	1	0	1	1	1	1	1	0	2	0	1	0	0	0	0	0	0	0		0	0	0	0	1	1
1053	5	5	5	6	4	2	4	4		0	2	1	4	4	3	1	1	4	4	4	4	0	3	1	0	1	3	2	2	0	2	1	3	1	2	2	0	0	0	0	0	0		0	1	0	1	1	0
1054	5	4	5	6	2	4	5	5	4	6	1	1	3	4	0	4	5	4	4	6	5	1	2	1	2	1	3	2	2	2	2	1	1	1	1	1	1	0	0	0	0	0		0	1	1	0		1
1055	1	3	5	5	0	0	6	0	6	0	0	5	0	1	0	1	5	6	5	1	3	0	2	0	2	0	3	1	2	1	0	0	0	0	1	0	0	1	0	0	1	0	1	0	0	0	0	0	1
1056	5	5	5	4	4	4	6	5	6	5	5	4	5	5	5	3	5	5	5	6	0	0	3	3	3	2	3	2	3	3	3	2	3	2	3	2	0	1	0	0	1	0	1	1	0		0	0	1
1058	1	2	1	5	4	1	5	1	5	1	1	4	2	3	2	1	5	5	5	1	4	5	2	0	2	0	3	1	2	1	1	0	2	0	1	0	0	0	0	0	0	0		0	1	0	0	1	1
1059	1	3	3	6	0	0	6	1	6	0	0	3	0	1	1	1	6	6	5	1	3	1	2	1	1	1	2	1	2	0	2	1	3	1	1	1	0	1	0	0	0	1	1	0	0	0	1	0
1060	1	1	1	1	1	0	6	0	5	1	4	6	0	1	1	2	5	5	4	1	5	1	2	1	0	1	2	1	2	1	2	0	3	2	2	1	0	1	0	0	1	0	1	0	0	0	0	1	1
1061	1	6	3	6	0	2	6	2	6	2	2	6	2	1	2	2	6	6	6	2	6	0	1	0	1	0	1	0	0	3	0	0	0	0	0	0	0	0	0	0	0	0		0	0	0	0	1	1
1062	0	0	0	0	0	1	0	0	0	1	1	6	3	0	1	3	6	6	6	0	3	1	2	0	2	0	2	0	0	1	2	0	0	0	1	0	0	0	0	0	0	0		0	0	0	1	1	1
1063	3	3	3	6	3	0	6	3	6	0	0	5	4	3	2	5	3	6	6	3	0	6	2	0	2	3	2	1	3	0	1	0	3	1	0	0	0	0	0	0	0	0		0	0	1	0	1	1
1064	4	5	4	6	4	0	0	3	6	5	5	5	4	4	1	1	6	6	6	5	4	6	2	1	0	1	3	0	1	1	1	0	2	1	2	0	0	0	0	0	0	0		0	0	0	1	1	1
1065	1	1	1	6	1	1	5	1	5	1	3	5	4	5	3	1	6	5	5	1	5	1	1	1	0	0	1	0	1	1	1	0	0	1	1	0	0	0	0	0	0	0		0	0	0	0	0	0
1066	0	0	0	0	0	0	6	0	6	0	0	6	0	0	0	0	6	6	6	0	6	0	0	0	0	0	0	0	0	0	0	0	0	0	0	0	0	0	0	0	0	0		0	0	0	0	0	0
1067	1	1	1	1	0	0	6	0	6	0	1	5	0	1	0	0	6	6	5	0	5	0	1	0	0	0	3	1	2	1	1	0	2	1	2	0	0	0	0	0	0	0		0	0	0	0	0	0
1068	2	3	3	6	0	0	6	0	6	0	1	4	4	5	0	2	6	5	6	3	4	1	1	0	1	0	2	0	1	2	1	0	1	0	0	0	0	0	0	0	0	0		0	1	0	0	0	1
1069	1	4	5	5	6	5	6	5	5	0	4	3	6	6	5	5	5	4	5	5	3	4	3	1	1	1	3	1	2	1	2	1	2	1	1	1	0	1	0	1	0	0	1	1	0		0	1	1
1070	0	0	0	5	1	1	5	1	4	0	0	5	1	0	1	0	6	5	5	0	6	0	1	0	0	0	1	1	1	0	1	0	0	0	0	0	0	0	0	0	0	0		0	0	0	0	1	1
1071	5	5	1	6	1	3	6	1	6	1	1	5	3	6	1	1	6	6	6	3	6	1	1	0	0	1	2	0	2	1	1	1	1	0	1	0	0	0	0	0	0	0		0	1	1	1	0	1
1072	5	5	1	6	1	3	6	1	6	1	1	5	3	6	1	1	6	6	6	3	6	1	1	0	0	1	2	0	2	1	1	1	1	0	1	0	0	0	0	0	0	0		0	1	1	1	0	1
1073	1	1	3	1	1	0	6	1	5	6	6	5	5	1	0	0	0	6	6	1	6	0	1	0	1	0	1	0	1	1	1	0	2	0	1	0	0	0	0	0	0	0		1	0	0	1	0
1074	0	0	1	6	0	0	0	1	5	5	0	5	1	1	0	0	5	5	5	1	4	1	1	1	0	0	3	1	2	1	1	0	2	0	0	1	0	0	0	0	0	0		0	0	0	0	1	0
1075	1	1	1	5	3	1	5	0	5	1	5	5	1	1	3	3	5	3	3	0	3	0	1	1	1	1	3	2	2	1	1	0	3	1	1	1	0	0	0	0	0	0		0	0	0	0	0	1
1076	1	5	3	3	2	3	5	2	6	1	0	4	0	3	0	3	4	5	6	2	4	2	1	1	1	1	2	1	1	1	1	0	2	1	1	0	0	0	0	0	0	0		0	1	0	1	1	1
1077	1	1	3	6	3	1	6	0	5	1	1	5	3	0	3	1	6	6	6	1	5	1	2	0	0	0	1	0	1	1	1	0	2	0	1	0	0	0	0	0	0	0		0	1	0	0	1	1
1078	2	1	1	6	0	5	6	1	4	0	0	5	0	4	0	1	6	6	6	1	3	0	1	0	1	0	2	1	0	1	1	0	0	0	0	0	0	0	0	0	0	0		0	1	0	1	1	1
1079	2	1	1	6	0	5	6	1	4	0	0	5	0	4	0	1	6	6	6	1	3	0	1	0	1	0	2	1	0	1	1	0	0	0	0	0	0	0	0	0	0	0		0	1	0	1	1	1
1081	5	3	5	1	5	3	6	1	6	3	0	6	0	0	0	0	0	1	6	0	6	0	1	0	0	0	1	0	0	0	1	0	1	0	0	0	0	0	0	0	0	0		0	0	0	0	0	0
1082	5	5	5	4	4	5	4	4	6	1	4	1	6	6	0	1	6	6	6	3	6	3	1	1	3	1	2	2	2	1	1	0	2	1	2	1	0	0	0	0	0	0		0	1	0	0	1	1
1083	5	3	3	5	0	6	6	5	6	5	3	3	6	6	3	5	6	5	5	3	5	6	3	1	3	1	3	2	2	3	3	0	1	3	1	2	1	1	0	1	1	1	2	0	1	1	0	0	0
1084	3	2	4	6	1	5	6	2	6	2	3	6	5	2	0	1	6	6	6	2	6	1	1	1	3	1	2	1	1	1	1	0	2	1	1	0	1	1	1	0	0	0	1	0	0	1	1	0	1
1086	5	5	5	5	1	1	6	5	6	5	4	4	5	6	1	4	5	5	5	5	5	1	2	2	2	1	3	2	2	2	1	1	1	2	1	1	1	0	0	0	0	0		0	0	0	1	1	1
1087	3	3	3	2	1	3	5	1	4	3	2	2	3	3	1	3	5	2	4	1	3	1	1	1	1	1	2	1	2	1	1	0	2	0	1	1	0	0	0	0	0	0		0	0	0	1	1	0
1088	4	5	5	6	0	5	6	5	6	0	0	3	5	6	0	4	6	6	6	5	5	1	3	2	0	2	3	2	2	1	2	0	0	1	2	1	0	0	0	0	0	0		0	1	0	1	0	1
1089	1	3	0	4	3	0	4	1	4	1	0	1	1	3	1	1	5	4	1	0	1	0	1	1	0	0	2	2	2	0	0	0	0	2	0	1	0	0	0	0	0	0		1	0		0	0	1
1090		5	5	6	3	3	6	5	6	3	3	5	5	6	3	3	5	5	6	4	5	4	2	1	3	1	3	1	1	2	2	0	2	1	1	1	0	0	0	0	0	0		0	0	0	0	1	1
1091	5	5	5	6	3	5	6	5	6	0	0	5	5	6	3	1	6	6	5	6	5		3	1	3	0	3	0	3	2	3	0	3	1	2	1	0	1	0	1	1	1	1	1	1		0	1	1
1092	1	1	0	5	1	1	6	0	6	0	1	6	1	0	1	0	6	6	6	0	6	1	1	0	0	0	0	0	0	1	0	0	0	0	0	0	0	0	0	0	0	0		0	0	0	0	1	1
1093	4	3	3	6	0	3	6	4	6	0	0	6	3	3	1	3	5	6	6	2	3	1	2	1	3	1	2	2	2	1	2	1	3	1	2	2	0	0	0	0	0	0		0	0	0	0	0	0
1094	1	1	1	6	1	3	6	0	3	0	1	3	3	1	0	0	5	5	4	0	4	1	1	0	1	1	1	1	1	1	1	1	0	1	1	0	0	0	0	0	0	0		0	0	0	0	1	1
1095	3	3	4	6	3	3	6	4	6	4	3	5	4	3	1	1	5	5	5	3	5	1	1	1	2	0	1	1	1	1	1	0	2	1	1	0	0	0	0	0	0	0		0	0	0	0	1	1
1096	0	1	2	6	0	0	6	0	5	0	3	5	0	3	0	0	6	5	6	1	6	1	1	0	0	0	1	0	1	1	1	0	0	0	1	0	0	0	0	0	0	0		0	0	0	0	0	1
1097	0	1	0	6			6	0	6	0	0	6	0	0	0	1	6	6	6	0	6	0	1	0	0	0	0	0	1	0	0	0	3	0	0	0	0	0	0	0	0	0		0	0	0	0	0	0
1098	2	3	3	3	0	1	6	1	5	3	2	5	1	1	0	1	6	5	5	1	5	4	1	0	0	0	0	0	1	1	0	0	2	0	0	0	0	0	0	0	0	0		0	0	0	0	1	1
1099	5	5	5	5	0	5	5	5	1	6	6	3	6	5	1	6	5	4	2	4	1	4	2	1	3	1	3	2	2	1	3	0	1	0	2	0	0	0	0	0	0	0		0	0	0	0	1	1
1100	0	0	0	6	0	0	6	0	6	0	0	6	0	0	0	0	6	6	6	0	6	0	0	0	0	0	0	0	0	0	0	0	0	0	0	0	0	0	0	0	0	0		0	0	0	0	0	0
1101	0	0	0	0	0	0	6	0	5	0	0	6	0	0	6	0	6	6	3	0	6	0	1	0	0	0	1	0	1	0	0	0	3	0	0	0	0	0	0	0	0	0		0	0	0	0	0	1
1102	5	5	5	3	0	5	6	3	6	1	3	0	6	6	0	0	5	3	1	3	6	1	2	1	2	3	3	2	2	1	0	1	1	2	0	2	0	0	0	0	0	0		0	0	0	0	0	0
1103	6	6	6	6	5	5	6	5	5	5	0	3	6	6	3	3	5	3	1	6	5	1	2	1	2	1	3	2	2	2	2	1	2	1	2	2	0	1	0	0	1	0	1	0	0	0	0	0	1
1104	1	2	1	6	1	1	6	1	2	0	0	5	1	1	0	1	6	5	3	1	1	0	1	1	2	0	2	0	2	2	1	0	1	0	0	1	0	0	0	0	0	0		0	1	0	1	1	1
1105	2	1	0	6	6	0	6	0	6	1	0	6	5	3	0	0	6	6	6	1	6	1	1	0	0	0	1	0	1	1	1	1	1	1	0	0	0	0	0	0	0	0		0	0	0	0	0	1
1106	0	0	1	6	0	1	6	0	5	3	0	5	0	0	1	0	6	0	5	0	5	0	1	1	0	1	2	1	1	1	1	0	1	1	1	0	0	0	0	0	0	0		0	0	0	0	0	0
1107	3	1	1		0	1	6	1	3	0		3	1	1	1	1	6	6	3	1	3	0	1	0	1	1	2	1	1	1	1	0	1	1	1	1	0	0	0	0	0	0		0	0	0	0	1	1
1108	1	1	1	6	0	0	6	1	6	0	0	5	1	1		1	6	6	6	1	5	1	1	0	0	0	2	1	0	1	1	0	0	0	1	0	0	0	0	0	0	0		0		0	1		1
1109	3	2	5	6	0	0	6	1	6	0	0	5	1	3	0	5	6	6	6	3	6	5	1	0	1	0	1	1	1	1	1	0	0	0	1	0	0	0	0	0	0	0		0	1	0	0	1	1
1110	0	1	1	1	0	0	6	0	5	0	0	4	0	0	0	0	6	6	5	0	6	0	1	0	0	0	0	0	2	1	0	0	0	0	0	0	0	0	0	0	0	0		0	0	0	0	0	1
1111	4	2	1	6						0	0	6	0	0	0	4	6	6	6		1	2	2	0	1	1	2	1	1		1	0	1		0	0	0		0	0	0	0		0	0	0	0	0	1
1112	2	4	5	6	1	3	6	5	5	3	5	3	5	5	1	1	6	6	5	3	6	0	3	1	3	1	3	2	2	1	3	0	3	1	3	0	0	0	0	0	0	0		0	1	0	0	1	1
1113	1	1	1	5	1	0	5	0	5	0	0	4	1	1	0	1	5	5	4	1	5	0	1	0	0	0	1	1	1	1	0	0	1		0	1	0	0	0	0	0	0		0	0	0	0	1	0
1114	1	1	1	6	1	0	6	0	6	0	0	5	1	0	0	0	6	6	5	0	6	0	1	0	0	0	0	0	1	1	0	0	0	0	0	0	0	0	0	0	0	0		0	0	0	0	1	1
1115	5	5	3	6	5	6	6	1	3	1	0	3	5	1	1	6	3	2	1	1	3	3	2	1	1	1	2	2	2	1	1	2	1	1	2	1	0	1	0	0	1	0	1	1	0	0	0	0	0
1116	3	4	3	6	3	1	6	1	1	3	4	4	4	4	3	5	2	4	4	3	4	5	3	0	1	1	2	1	2	2	3	2	3	1	3	3	1	1	1	1	0	0	1	0	0	1	1	1	0
1117	1	1	5	6	2	2	6	0	6	1	1	5	0	3	1	1	6	5	6	1	5	0	1	0	0	0	1	0	0	2	0	0	2	0	0	1	0	0	0	0	0	0		0	0	0	0	1	1
1118	0	1	1	6	0	0	5	0	5	0	0	5	3	3	1	0	6	5	5	1	3	1	1	0	0	0	0	0	0	1	1	0	0	0	0	0	0	0	0	0	0	0		0	1	0	1	0	1
1119	5	5	6	4	2	1	6	3	5	4	2	3	3	6	4	0	5	5	5	5	6	1	2	1	2	0	3	1	2	3	3	3	1	0	2	0	0	0	0	0	0	0		0	1	0	0	0	1
1120	1	0	0	3	0	1	6	0	6	0	0	6	0	1	0	0	6	6	6	0	6	0	0	0	0	0	0	0	0	1	0	0	3	0	0	0	0	0	0	0	0	0		0	0	0	0	0	1
1121	1	1	1	3	1	0	6	0	5	1	1	5	3	1	3	1	4	4	3	0	3	0	1	0	1	0	1	0	1	1	0	0	1	0	0	0	0	0	0	0	0	0		0		0	0	1	1
1122	0	1	1	6	0	1	6	1	6	0	0	6	0	0	0	0	6	6	6	0	6	0	1	0	0	0	0	0	2	0	0	0	3	0	0	0	0	0	0	0	0	0		0	0	0	0	0	1
1123	4	5	3	1	1	4	6	1	6	0	0	3	0	1	0	1	6	6	6	2	6	0	3	1	1	1	2	1	2	0	1	0	3	1	1	2	0	0	0	0	0	0		0	1	0	1	0	1
1124	2	3	3	3	3	1	3	2	3	4	3	3	4	3	1	2	5	5	4	1	2	3	1	1	1	1	1	1	2	1	1	1	2	1	1	1	0	0	0	0	0	0			0	0	0	0	1
1125	2	1	1	5	0	1	5	0	4	6						3	5	5	5	0	6	4	1	0	0	0	2	1	1	1	0	2	3	0	0	0	0	0	0	0	0	0		0	0	0	0	1	1
1126	1	1	1	1	4	5	4	1	2	5	5	3	2	1	5	1	4	4	2	1	2	1	2	1	1	0	2	2	3		0	0	1	1	0	2	0	0	0	0	0	0		0	0	0	0	1	1
1127	1	1	1	6	1	0	6	1	3	0	1	5	3	3	0	1	6	5	5	1	3	1	2	0	1	0	1	1	1	1	1	0	2	0	0	0	0	0	0	0	0	0		0	1	0	0	1	1
1128	1	1	0	6	1	1	6	0	5	0	0	6	1	1	0	1	6	6	6	0	6	1	1	0	0	0	0	0	1	0	0	0	2	0	0	0	0	0	0	0	0	0		0	0	0	0	1	1
1129	5	6	6	6	6	6	0	5	0	6	0	0	6	6	6	0	0	0	0	6	0	6	2	3	2	3	3	3	3	3	1	2	2	3	1	0	1	1	0	0	1	0	2	1	0	0	0	0	0
1130	4	4	4	5	4	5	5	3	4	5	6	1	3	4	3	2	3	4	5	3	3	0	2	2	1	1	3	2	2	1	0	1	1	1	0	0	0	0	0	0	0	0		0	0	0	0	0	1
1131	0	0	0	6	0	0	6	0	6	0	0	6	0	6	0	0	0	6	6	0	6	0	0	0	0	0	0	0	0	0	0	0	0	0	0	0	0	0	0	0	0	0		0	0	0	0	0	1
1132	3	4	3	6	1	1	5	1	4	0	0	4	3	3	1	1	6	5	3	1	5	1	1	1	0	0	2	1	2	1	1	1	2	1	0	0	0	0	0	0	0	0		0	1	0	0	1	1
1133	5	3	4	6	0	3	6	2	6	0	1	3	3	4	0	1	6	6	5	1	5	5	1	1	3	2	3	2	2	1	1	1	2	2	2	2	0	1	0	0	0	0		0	0	0	0	0	0
1134	1	5	2	6	2	2	3	1	2	5	5	5	4	5	5	6	6	6	5	3	5	1	2	0	0	0	2	1	1	3	1	2	1	1	0	1	1	1	0	1	1	0	1	0	0	0	1	1	0
1135	5	5	4	6	0	1	6	3	6	1	3	3	5	5	0	3	5	6	6	5	6	1	2	0	0	1	2	2	2	2	0	2	3	1	0	1	0	0	0	0	0	0		0	0	0	0	0	1
1136	2	3		6	0	0	6	1	3	1	0	5	6	5	2	0	6	6	6	1	3	0	1	1	0	0	1	1	2	1	0	0	3	1	0	1	0	0	0	0	0	0		0	0	0	1	1	0
1137	0	0	0	5	3	0	6	0	6	0	0	5	0	1	0	0	6	6	6	0	5	2	1	0	0	0	1	0	1	1	1	0	1	0	0	0	0	0	0	0	0	0		1	0	0	0	0	1
1138	1	1	3	6	5	3	4	1	3	0	0	5	1	3	5	0	6	5	5	3	4	1	2	0	0	0	3	1	2	1	3	0	3	0	0	1	0	0	0	0	0	0		0	0	0	0	0	1
1139	6	6	6	6	0	1	6	6	4	0	0	0	0	0	0	6	6	6	6	6	6	0	3	1	3	1	3	2	3	3	1	2	1	1		2	0	0	0	0	0	0		0	0	0	0	1	1
1140	5	6	4	6	3	0	6	4	6	0	0	1	3	5	1	1	6	6	6	5	5	0	3	1	3	2	3	1	1	1	2	0	1	2	2	0	0	1	0	1	1	1	1	1	1	0	1	0	0
1141	0	0	4	6	3	1	6	0	5	5	2	5	4	0	0	0	6	5	5	0	6	1	1	1	0	0	2	0	2	1	0	0	1	2	1	0	0	0	0	0	0	0		0	0	0	0	1	1
1142	6	6	6	5	5	5	6	5	5	3	1	1	1	6	5	1	6	6	6	3	0	5	2	1	1	1	2	0	2	3	2	0	2	2	1	1	0	0	0	0	0	0		0	0	0	1	1	1
1143	3	2	1	5	0	2	6	1	6	0	3	6	1	1	0	1	6	5	6	1	5	5	2	0	1	0	1	0	1	1	1	0	2	0	0	0	0	0	0	0	0	0		0	0	0	0	1	1
1144	1	1	0	6	0	0	6	1	6	0	0	5	1	0	1	0	6	6	6	1	2	1	1	0	0	0	1	0	1	1	1	0	0	0	1	0	0	0	0	0	0	0		0	0	0	0	1	1
1145	5	5	2	3	0	3	6	3	5	0	1	5	4	6	0	3	6	6	6	5	6	3	2	1	2	1	3	2	3	1	2	2	3	2	1	1	0	0	0	0	0	0		0	0	0	0	0	1
1146	1	1	0	6	1	2	6	0	6	3	2	6	3	3	1	0	6	6	6	1	6	2	1	0	0	0	1	0	1	1	1	0	2	0	1	0	0	0	0	0	0	0		0	0	0	0	1	1
1147	1	1	0	6	1	1	6	0	5	5	1	5	1	0	1	0	6	6	6	1	3	0	1	1	0	0	2	1	2	1	0	0	0	1	0	1	0	0	0	0	0	0		0	0	0	0	0	1
1148	1	2	2	6	3	5	6	2	5	0	1	6	1	1	0	1	6	4	4	2	5	6	1	0	1	1	2	1	2	1	1	1	3	1	1	0	0	0	0	0	0	0		0	1	0	0	1	1
1149	3	3	3	6	4	0	6	1	5	0	1	5	1	1	1	1	6	5	5	0	5	0	2	1	0	0	2	0	2	0	1	1	1	2	1	2	1	0	0	0	0	0		0	1	0	0	0	1
1150	2	3	4	6	0	0	6	1	4	0	1	3	1	1	0	0	6	5	3	1	3	0	1	0	0	0	1	0	2	1	0	0	0	1	1	1	0	0	0	0	0	0		0	1	0	0	1	1
1151	5	5	5	5	5	5	3	5	6	6	2	1	5	5	5	3	5	5	5	5		4	3	3	1	2	2	2	2	2	2	0	3	0	1	2	0	0	0	0	0	0		0	0	0	0	0	0
1152	3	0	1	6	0	0	6	0	6	0	0	5	0	0	0	0	6	6	6	0	5	1	1	0	0	0	2	0	1	1	1	0	1	0	0	0	0	0	0	0	0	0		0	0	0	0	0	1
1153	1	4	6	6	3	0	6	4	4	0	0	2	0	2	1	0	6	6	5	2	3	1	1	1	2	1	2	1	2	1	1	0	2	2	1	0	0	0	0	0	0	0		0	0	0	0	0	0
1154	3	3	1	5	0	3	6	4	5	0	3	5	3	6	0	0	6	6	6		5	1	2	2	2	1	3	1	2	0		1	1	1	1	1	0	0	0	0	0	0		0	0	0	0	1	1
1155	0	0	0	6	0	0	6	0	6	0	0	6	0	0	0	0	6	6	6	0	6	5	1	0	0	0	1	0	3	0	0	0	3	0	0	2	0	0	0	0	0	0		0	0	0	0	1	1
1156	3	4	3	5	1	3	5	3	5	3	3	4	3	3	0	3	5	5	5	3	2	0	1	1	1	1	2	1	2	1	1	0	1	1	1	1	0	0	0	0	0	0		0	0	0	1	1	1
1157	0	0	1	1	0	1	6	0	5	1	1	5	1	1	0	0	6	5	5	0	6	0	1	0	0	0	0	0	1	1	0	0	0	0	0	0	0	0	0	0	0	0		0	0	0	0		1
1158	6	6	6	6	3	6	6	6	6	0	6	3	3	6	0	1	6	6		6	6	1	3	3	3	2	3	1	3	2	3	2	3	1	3	0	0	1	0	0	1	0	1	0	0	0	0	0	0
1159	3	2	2	6	3	6	6	0	6	0	0	5	0	4	0	0	6	6	6	1	6	1	0	0	0	0	0	0	0	1	0	0	0	0	0	0	0	0	0	0	0	0		0	0	0	0	0	0
1160	1	1	1	6	1	1	6	1	6	0	0	5	1	3	1	1	5	4	4	1	3	0	1	0	2	0	2	1	1	1	1	0	0	0	1	0	0	0	0	0	0	0		0	0	0	0	0	1
1161	5	4	0	6	0	4	6	5	5	0	6	4	4	3	0	5	5	5	6	2	1	0	2	0	3	1	3	2	2	1	2	0	2	1	2	1	0	1	0	0	1	0	1		0	0	0	0	1
1162	1	1	1	1	0	1	6	1	6	1	1	6	0	1	0	1	6	6	6	1	6	1	1	0	0	0	2	1	1	0	1	0	2	0	1	0	0	0	0	0	0	0		0	0	0	1	1	1
1163	3	1	1	5	2	3	6	0	5	1	1	6	1	3	1	1	5	6	6	0	5	1	1	1	1	0	0	0	1	1	0	0	1	0	0	0	0	0	0	0	0	0		0	1	0	1	1	1
1164	3	6	6	6	0	0	6	3	6	1	1	2	1	1	0	3	6	6	6	5	6	1	2	1	3	1	3	0	2	1	1	0	3	1	1	1	0	0	0	0	0	0		0	1	0	0	0	1
1165	1	3	0	6	0	1	6	0	6	0	3	6	1	1	0	0	6	6	6	1	6	0	1	0	0	0	1	0	1	0	0	0	1	0	0	0	0	0	0	0	0	0		0	0	0	0	1	1
1166	1	1	1	2	3	1	6	0	6	0	6	5	0	0	0	1	6	6	5	0	5	0	1	0	1	0	3	0	1	1	1	0	0	1	0	0	0	0	0	0	0	0		0	0	0	0	0	1
1167	3	4	3	5	1	4	6	0	5	0	5	5	5	5	1	3	6	5	5	0	6	2	1	0	0	0	1	0	1	1	0	1	1	1	1	1	0	0	0	0	0	0		0	0	0	0	0	1
1168	5	5	3	3	0	1	6	3	6	0	0	6	5	5	0	1	6	6	6	3	6	0	1	1	1	1	3		1	1	1	0	1	1	1	0	0	0	0	0	0	0		0	0	0	1	1	1
1169	1	3	1	5	1	2	5	2	5	2	1	4	3	3	2	1	5	5	5	2	5	1	2	1	1	1	2	1	1	2	1	0	1	1	1	1	0	1	0	0	0	0	1	0	0	0	0	1	1
1170	1	1	1	5	1	1	5	1	3	1	3	5	1	3	1	1	5	5	5	2	5	0	1	1	1	0	2	1	2	1	1	1	1	1	1	0	0	0	0	0	0	0		0	0	0	0	0	1
1171	5	6	5	5	3	6	6	5	6	1	0	5	0	6	6	6	5	6	6	3	3	5	2	1	2	1	2	1	1	1	1	1	2	2	1	0	0	1	0	0	1	0	2	0	0	0		1	0
1172	5	6	6	6	0	5	6	6	6	0	0	1	6	6	0	0	6	6	6	6	6	4	2	0	1	0	0	1	1	1	0	0	1	0	0	0	0	0	0	0	0	0		0	0	1	1	0	0
1173	5	3	3	6	5	6	6	3	6	3	6	5	5	6	3	3	6	6	6	3	6	0	2	1	0	2	3	2	3	3	1	1	3	2	2	2	1	1	1	0	0	1	2	0	0	1	0	0	1
1174	5	5	5	5	0	5		2	1	0	6	1	1	6	0	2	2	5	5	5	2	2	3	3	3	3	3	3	3	2	3	2	1	2	3	3	0	1	1	1	0	0	1	0		0	0	0	0
1175	1	1	1	1	0	1	6	0	6	3	2	5	0	6	1	1	6	6	6	0	3	0	1	0	0	0	2	1	1	1	1	0	1	0	0	0	0	0	0	0	0	0		0	0	0	0	0	0
1176	4	6	5	6	0	0	6	4	6	0	0	5	0	6	0	0	6	6	2	6	6	0	1	0	0	1	2	3	3	2	1	1	1	1	2	3	0	1	0	0	1	0	1	0	0	0	1	0	0
1177	3	1	1	2	0	1	6	1	5	0	0	5	3	1	0	1	5	5	5	1	2	0	1	0	0	0	0	1	2	1	1	0	2	0	0	0	0	0	0	0	0	0		0	0	0	0	0	0
1178	1	2	6	6	3	0	5	2	5	0	1	5	3	3	3	4	5	6	6	6	4	1	3	1	1	2	3	2	2	1	1	3	1	1	1	0	0	1	0	1	0	0	1	0	0	0	0	1	0
1179	1	2	1	6	3	0	6	1	6	0	1	5	3	0	1	0	6	6	6	1	6	3	2	1	2	2	3	2	2	1	2	0	3	2	1	1	0	0	0	0	0	0		0	0	0	0	1	0
1180	6	6	6	6	0	5	4	5	2	4	6	0	3	6	2	1	4	3	1	6	6	4	2	2	2	2	1	1	2	3	1	2	0	2	2	2	0	0	0	0	0	0		0	1	0	1	0	0
1181	0	0	0	6	0	0	6	0	1	0	0	6	0	0	0	0	2	6	1	0	1	0	0	0	0	0	0	1	1	0	0	0	0	0	1	0	0	0	0	0	0	0		0	0	0	0	0	0
1182	3	3	0	6	0	0	6	1	5	0	0	5	1	0	0	0	6	5	5	1	5	1	1	1	1	1	2	1	2	1	1	0	0	0	1	1	0	0	0	0	0	0		0	1	0	0	0	1
1183	1	1	0	6	0	5	6	0	6	6	0	5	0	1	6	5	6	6	5	0	5	0	2	0	2	0	2	1	2	1	2	0	0	0	1	1	0	0	0	0	0	0		0	0	0	1	1	1
1184	1	1	2	6	0	1	6	1	5	1	5	6	1	4	0	3	5	5	5	1	5	0	1	1	0	1	2	1	1	1	1	0	0	1	1	1	0	0	0	0	0	0		0	0	0	1	1	1
1185	0	1	1	6	0	1	6	1	6	3	3	5	1	1	1	1	5		3	1	6	0	1	0	0	1	2	1	1	1	1	0	0	1	1	1	0	0	0	0	0	0		0	0	0	0	1	1
1186	0	1	1	1	1	2	6	1	3	1	3	2	0	0	0	2	4	3	3	0	6	0	1	1	0	1	1	1	1	1	1	0	1	0	0	0	0	0	0	0	0	0		0	0	0	0	0	0
1187	3	1	0			1	6	0	3	0	0	0	0	0	1	0	5	1	5	0	1	0	1	0	0	0	1	0	2	1	0	0	0	1	1	0	0	0	0	0	0	0		0	0	0	0	0	0
1188	1	2	3	5	5	3	6	2	5	5	3	4	5	2	4	2	6	6	5	3	5	0	1	0	1	1	2	2	2	1	1	0	2	2	0	1	0	0	0	0	0	0		0	1	0	0	1	1
1189	1	1	1	6	0	0	0	0	6	0	0	6	0	3	0	0	6	6	6	1	5	0	3	0	0	0	1	1	2	0	0	0	3	0	0	0	0	1	0	1	0	0	1	0	0	0	0	1	1
1190	6	6	6	6	0	5	6	6	4	0	2	0	0	6		2	5	5	6	6		6	3	1	2	0	3	0	2	3	2	1	3	1	2	1	0	1	1	0	1	0	2	0	0	0	0	0	0
1191	1	3	3	1	2	3	6	1	6	5	6	6	3	3	0	1	6	6	6	1	0	1	2	0	1	1	1	1	1	0	0	0	1	0	0		0	0	0	0	0	0		0	0	0	0	0	1
1192	5	5	5	6	0	6	6	6	6	5	6	5	5	6	0	1	6	6	6	6	6	5	3	3	2	2	3	2	3	3	2	0	2	2	3	1	0	0	0	0	0	0		0	1	0	0	0	1
1193	1	3	3	6	0	0	6	0	3	5	0		0	3	1	0	6	6	3	0	5	6	1	0	0	0	1	0	0	1	1	0	0	0	0	0	0	0	0	0	0	0		0	0	0	0	1	1
1194	1	4	1	5	5	0	5	1	3	1	1	4	4	5	0	2	6	5	5	3	5	5	2	2	0	1	2	2	1	1	0	0	1	1	0	0	0	0	0	0	0	0		0	0	0	1	1	1
1195	1	2	3	5	0	1	6	2	3	0	3	3	5	5	1	1	6	6	5	3	6	4	3	1	2	2	0	1	1	2	1	0	0	2	1		0	0	0	0	0	0		0	0		0	0
1196	1	2	3	5	0	1	6	2	3	0	3	3	5	5	1	1	6	6	5	3	6	4	3	1	2	2	0	1	1	2	1	0	0	2	1		0	0	0	0	0	0		0	0		0	0
1198	0	1	0	6	0	1	6	0	6	0	2	5	0		0	1	6	6	6	1	6	2	1	0	0	0	1	1	1	1	1	0	1	0	0	0	0	0	0	0	0	0		0	0	0	0	1	1
1199	1	1	1	5	1	1	5	0	5	0	1	6	1	1	1	1	5	5	5	0	6	0	1	0	1	0	2	0	1	1	1	0	1	0	1	1	0	0	0	0	0	0		0	1	0	0	1	1
1200	1	0	0	5	5	6	6	0	6	6	6	6	6	1	5	0	6	5	5	1	6	5	1	1	0	1	1	1	1	1	0	0	1	1	0	0	0	0	0	0	0	0		0	0	0	0	0	0
1201	3	3	3	6	0	0	6	3	5	0	6	3	0	6	0	0	6	6	6	3	3	1	2	0	0	0	1	1	1	1	1	0	2	0	1	0	0	0	0	0	0	0		0	0	0	0	1	1
1202	6	6	5	6	5	6	5	6	5	4	0	5	6	5	5	6	5	3	3	6	3	0	3	3	3	3	3	2	2	0	3	1	3	3	3	0	0	1	0	0	1	0	1	0	0	0	0
1203	1	2	3	5	1	0	6	1	6	1	0	4	1	1	1	1	6	5	5	1	5	1	2	0	0	0	1	1	1	1	1	0	1	1	0	0	0	1	0	1	0	0	1	0	0	0	0	0	1
1204	5	6	6	5	4	6	6	6	6	6	6	0	6	6	0	6	6	4	5	6	5	6	3	3	3	3	3	2	1	3	3	3	2	3	3	3	1	0	0	0	0	0		0	0	0	0	1	0
1205	6	6	6	6	5	5	6	5	2	3	1	1	6	6	1	5	6	5	5	6	3	5	3	1	3	2	3	2	2	2	2	2	2	0	2	0	0	0	0	0	0	0		0	0	0	0	1	0
1206	6	6	6	6	1	5	6	5	6	0	0	1	1	6	1	5	6	5	6	6	5	5	3	1	2	1	3	1	2	2	2	1	2	1	2	1	0	1	1	1	0	0	1	1	1	1	1	0	0
1207	5	0	1	1	0	3	6	1	6	0	0	6	3	1	1	0	6	6	6	0	6	0	1	1	0	0	1	0	1	1	0	0	0	0	0	0	0	0	0	0	0	0		0	0	0	0	0	1
1208	4	4	5	6	0	0	6	1	6	0	0	5	1	1	0	6	6	6	6	1	6	0	1	0	0	0	2	0	0	1	1	0	0	0	1	0	0	0	0	0	0	0		0	0	0	0	0	1
1209	3	4	3	5	5	1	5	3	3	1	0		3	5	0	3	2	3	3	3	2	0	2	2	0	2	3	2	3	1	1	1	3	2	1	2	0	0	0	0	0	0		0	1	0	0	1	0
1210	0	1	1	1	1	1	6	0	6	0	0	5	4	1	0	1	6	6	6	0	6	0	2	0	3	1	3	1	1	0	1	1	1	1	0	2	0	0	0	0	0	0		0	0	0	0	1	1
1211	5	5	3	3	3	6	5	6	1	6	5	0	6	6	5	6	3	5	5	6	5	5	2	3	1	2	3	2	2	0	0	2	1	2	0	0	0	0	0	0	0	0		0	0	0	0	0	1
1212	5	5	6	3	3	5	3	5	3	3	3	1	1	5	1	3	3	3	3	5	3	3	2	1	3	1	3	1	2	2	2	0	2	1	2	1	0	0	0	0	0	0		0	1	0	0	1	1
1213	5	6	6	6	3	3	6	5	5	5						5	5	5	6	6	5	5	2	3	0	2	2	2	3	2	1	1	1	2	1	1	0	0	0	0	0	0		0	0	0	0	1	1
1214	5	5	6	4	3	3	4	4	2	1	1	1	4	1	0	4	2	2	1	3	1	1	3	3	1	3	3	3	3	2	1	1	2	3	2	2	0	0	0	0	0	0		0	0	0	0	0	0
1215	5	6	4	6	3	4	6	5	4	5	5	4	5	5	4	3	6	6	3	5	5	5	2	1	1	1	3	1	2	2	1	1	2	1	1	2	0	0	0	0	0	0		0	1	0	0	0	0
1216	4	4	5	6	3	1	5	5	5	1	0	2	6	1	1	2	6	6	4	5	1	3	3	1	3	1	3	1	1	3	3	1	2	0	2	1	0	0	0	0	0	0		0	0	0	0	0	1
1217	3	1	1	1	1	3	6	0	5	0	0	5	1	1	0	1	6	6	6	0	6	1	1	0	1	0	1	1	1	1	0	0	1	0	0	0	0	0	0	0	0	0		0	0	0	0	0	0
1218	1	0	0	6	0	0	6	1	5	0	0	5	1	6	1	0	6	6	6	1	5	0	1	0	1	0	1	0	2	0	1	0	3	0	1	0	0	0	0	0	0	0		0	0	0	0	1	1
1219	1	1	3	3	3	1	6	1	5	3	6	0	3	6	3	0	6	3	3	1	6	0	2	1	1	1	2	1	2	1	0	0	2	2	1	1	0	0	0	0	0	0		1	0	0	0	1	1
1220	1	1	1	6	1	0	6	1	5	0	1	6	1	3	0	1	6	5	3	1	5	1	1	0	0	0	2	0	2	0	1	0	3	0	1	1	0	0	0	0	0	0		0	0	0	0	0	1
1221	0	0	1	6	0	0	6	0	6	0	0	6	0	1	0	0	6	6	6	0	6	0	1	0	0	0	0	0	0	0	0	0	1	0	0	0	0	0	0	0	0	0		0	0	0	0		1
1222	0	0	0	1	1	0	6	0	6	0	0	6	0	0	0	0	6	6	6	0	6	0	0	0	0	0	0	0	0	0	0	0	1	0	0	0	0	0	0	0	0	0		0	0	0	0	1	1
1223	5	5	6	6	1	5	6	5	5	0	0	3	0	5	0	5	6	6	6	5	5	5	2	1	2	1	3	1	3	3	2	2	3	1	2	3	0	0	0	0	0	0		0	1	1	0	0	1
1224	4	3	4	5	1	3	5	3	5	0	0	3	3	4	0	0	5	5	3	3	5	1	3	1	0	0	1	2	1	1	0	1	0	2	0	3	0	0	0	0	0	0		0	1	0	0	0	1
1225			4	4	4	3	4	3	1	2	3	2	5	4	4	2	3	2	2	4	4	4	2	3	1	2	3	2	3	2	2	1	2	2	1	3	0	0	0	0	0	0		0	0	0	0	1	0
1226	1	1	1	2	0	0	6	1	6	0	3	5	2	0	0	1	6	6	6	0	6	1	1	0	0	0	1	0	1	1	0	0	0	0	0	0	0	0	0	0	0	0		0	0	0	0	0	0
1227	2	2	1	4	0	2	6	2	5	0	0	3	4	2	0	4	6	0	2	1	6	3	1	0	1	0	3	1	2	1	0	0	2	0	1	1	1	1	0	0	1	0	2	0	0	0	1	0	0
1228	1	3	5	5	0	0	5	1	1	0	1	5	1	1	0	1	5	5	5	1	1	2	2	1	2	0	2	1	1	1	1	0	1	0	1	0	1	1	0	0	1	0	2	0	0	0	0	0	0
1229	1	3	5	5	0	0	5	1	1	0	1	5	1	1	0	1	5	5	5	1	1	2	2	1	2	0	2	1	1	1	1	0	1	0	1	0	1	1	0	0	1	0	2	0	0	0	0	0	0
1230	1	3	5	5	0	0	5	1	1	0	1	5	1	1	0	1	5	5	5	1	1	2	2	1	2	0	2	1	1	1	1	0	1	0	1	0	1	1	0	0	1	0	2	0	0	0	0	0	0
1231	5	4	4	0	6	6	5	3	0	1	5	3	6	6	6	4	0	2	1	3	0	1	3	1	2	2	3	2	3	1	0	0	3	1	1	3	0	0	0	0	0	0		0	0	0	0	0	0
1232	6	5	6	6	6	3	5	5	1	0	0	0	1	3	3	1	5	3	1	5	1	0	2	2	2	3	3	2	2	3	2	2	2	2	2	1	0	1	0	1	0	0	1	0	0	0	0	0	1
1233	1	0	0	1	0	0	1	0	3	4	3	6	0	1	0	1	6	5	5	0	6	1	1	0	0	0	0	0	0	0	0	0	0	0	0	0	0	0	0	0	0	0		0	1	0	0	1	1
1234	2	3	3	3	1	4	6	0	4	3	1	3	2	3	1	5	6	5	5	0	1	1	1	1	0	0	1	0	2	1	1	0	2	0	0	0	0	0	0	0	0	0		0	1	0	0	1	1
1235	5	6		6	3	6	5	5	4	2	4	1	5	6	2	6	5	3	1	5	4	1	2	2	3	2	3	2	2	2	2	1	2	2	2	2	0	1	0	0	1	0	1	0	0	0	0	0	0
1236	6	6	6	5	5	6	5	6	0	6	6	0		6	5	6	5	5	1	6	0	3	3	3	3	2	3	2	2	3	3	1	1	2	2	1	1	1	0	0	1	0	2	0	0	0	0	0	1
1237	1	3	3	6	3	0	6	1	6	0	0	5	0	6	0		6	6	5	1	6	0	2	0	0	0	2	0	0	1	1	0	2	0	0	0	0	1	0	1	1	0	1	0		0	0	0	1
1238	4	4	6	6	0	5	5	5	5	4	5	0	5	6	0	3	6	5	3	5	6	3	2	1	3	0	3	1	2	1	3	0	2	1	2	0	0	0	0	0	0	0		0	1	0	0	1	1
1239	0	1	1	5	3	3	3	0	5	0	0	5	0	1	1	0	6	5	5	0	3	1	1	0	0	0	0	0	0	0	0	0	0	0	0	0	0	0	0	0	0	0		0	0	0	0	0	0
1240	5	5	4	3	3	0	6	1	6	0	0	5	5	5	3	0	5	5	5	1	1	1	1	0	0	1	2	0	1	1	1	0	0	1	0	0	0	0	0	0	0	0		0	1	0	0	1	1
1241	1	5	6	5	0	3	6	5	5	1	0	2	3	3	0	1	6	6	6	5	5	0	2	1	1	1	3		2	1	1	0	2	1	0	0	0	0	0	0	0	0		0	0	0	0	1	0
1242	0	0	0	5	1	0	6	0	6	0	0	6	1	0	5	0	6	4	5	0	4	0	1	0	0	0	1	0	1	0	0	0	1	0	0	1	0	0	0	0	0	0		0	0	0	0	1	1
1243	3	4	4	6	3	3	5	2	2	5	3	1	3	6	4	4	6	5	2	2	1	5	2	1	2	1	2	1	2	1	1	1	2	1	1	2	0	1	0	0	1	0	2	0	0	0	0	0	1
1244	0	1	0	6	0	0	6	0	6	0	0	6	0	1	0	1	6	6	6	0	6	0	1	0	0	0	1	0	1	0	0	0	3	0	0	0	0	0	0	0	0	0			0	0	0	1	1
1245	1	2	2	6	3	1	6	0	3	0	1	5	1	2	3	0	6	6	5	1	6	0	1	0	1	0	1	1	1	1	1	0	0	0	1	0	0	0	0	0	0	0		0	0	0	0	1	1
1246	4	4	3	6	3	3	6	5	5	0	1	3	3	5	1	1	5	6	4	5	4	0	3	1	3	2	3	2	3	2	2	1	1	2	2	1	1	1	0	1	0	0	1	0	0	1	0	1	0
1247	6	6	6	6	1	5	6	5	5	1	0	1	1	3	0	6	5	6	5	5	4	1	3	0	1	0	3	1	1	1	1	0	1	0	2	1	1	1	0	0	1	0	2	0	0	0	0	1	1
1248	2	1	1	1	0	1	6	0	6	0	3	6	1	2	0	0	6	6	6	1	6	0	1	0	0	0	2	0	0	1	0	0	1	0	1	0	0	0	0	0	0	0		0	0	0	0	1	1
1249	3	3	4	2	3	0	3	1	2	2	1	5	0	3	1	1	6	3	5	1	2	1	1	0	2	0	1	0	1	1	0	0	0	1	0	1	0	0	0	0	0	0		0	0	0	0	1	1
1250	0	1	1	6	1	0	6	0	6	0	1	6	0	0	1	0	6	6	6	0	6	0	1	0	0	0	0	0	0	1	0	0	0	0	0	0	0	0	0	0	0	0		0	0	0	0	1	1
1251	3	3	5	3	0	0	6	1	6	0	0	6	0	3	0	0	6	6	6	3	6	1	1	0	1	0	1	0	2	1	0	0	2	0	1	0	0	0	0	0	0	0		0	0	0	0	1	1
1252	1	1	0	6	2	1	6	0	5	0	0	5	0	0	2	0	6	5	3	0	5	1	1	0	0	0	1	0	2	1	1	0	2	0	0	0	0	0	0	0	0	0		0	0	0	0	1	1
1253	3	3	1	6	0	1	6	1	6	6	0	6	0	5	1	1	6	6	5	1	6	3	1	1	1	1	1	1	1	1	1	0	1	1	1	1	0	0	0	0	0	0		0	0	0	0		1
1254	5	5	5	3	3	4	4	3	2	3	3	3	6	5	1	3	3	4	3	3	0	2	2	1	1	2	2	2	2	1	1	0	3	2	1	1	0	0	0	0	0	0		0	1	0	1	1	0
1255	0	1	1	5	1	0	6	0	6	0	0	5	1	0	1	0	6	5	6	0	6	1	1	0	0	0	1	0	1	1	0	0	0	0	0	0	0	0	0	0	0	0		0	0	0	0	1	1
1256	3	2	4	5	4	3		6	6	4	4	3	1	4	3	1	5	5	5	1	2	1	2	1	0	1	2	1	3	1	1	0	3	1	0	1	0	0	0	0	0	0		0	0	0	0	0	1
1257	0	0	6	6	0	0	6	0	6	0	0	6	0	6	0	0	6	6	6	1	5	0	0	0	1	0	1	0	0	2	0	0	0	0	0	0	0	0	0	0	0	0		0	0	0	1	1	0
1258	1	6	1	6	1	2	6	5	5	1	6	6	0	6	2	2	5	1	4	6	1	0	3	0	1	1	2	3	3	1	1	1	3	1	0	1	0	0	0	0	0	0		0	0	0	0	1	0
1259	1	1	0	1	0	0	6	1	6	0	0	5	0	0	0	0	6	6	6	0	5	1	1	0	0	0	1	0	0	1	1	0	1	0	0	0	0	0	0	0	0	0		0	1		0	1	1
1260	5	5	1	5	0	3	6	4	5	0	0	5	3	4	0	5	4	5	4	3	2	0	1	0	2	0	3	1	2	0	1	0	2	0	3	0	0	0	0	0	0	0		0	0	0	0	0	1
1261	5	5	5	6	1	3	6	5	6	0	5	6	5	5	0	5	6	6	6	5	6	2	2	1	2	1	2	2	2	0	1	1	2	1	2	1	0	1	0	0	1	0	1	0		0	0	0	1
1262	6	3	6	6	5	5	5	6	6		5	3	6	6	5	5	6	6	5	6	5	4	3	1	3	1	3	2	2	3	3	0	3	1		1	0	1	1	1	0	1	1	0	1	0	0	0	1
1263	1	0	0	1	0	0	6	0	5	0	0	5	1	1	0	0	6	5	5	0	6	0	1	0	1	0	0	0	1	1	0	0	0	0	0	0	0	0	0	0	0	0		0	0	0	0	1	1
1264	0	1	1	1		6	6	0	5	2	1	6	1	0	0	0	6	5	5	0	5	0	1	0	0	0	1	0	1	1	0	0	3	0	1	0	0	0	0	0	0	0		0	0	0	0	1	1
1265	3	5	3	6	0	3	6	3	6	0	0	6	0	1	0	1	6	6	3	2	6	1	1	0	1	1	2	1	1	1	1	0	2	0	1	0	0	1	0	1	0	0	1	0	1	1	1	1	1
1266	1	0	0	6	0		6	0	6	0	1	6	0	0	0	0	6	6	5	0	6	1	1	0	0	0	1	1	1	0	0	0	2	0	0	0	0	0	0	0	0	0		0	0	0	0	1	1
1267	5	5	5	5	0	4	6	0	6	6						1	6	6	6	5	5	5	2	0	3	0	3	1	3	0	3	0	3	0	2	0	1	1	0	0	1	0	2	0	0	0	0	0	1
1268	5	5	5		0	3	6	6	6	3	0	0	6	6	0	5	6	5	5	6	6	0	3	3	3	1	3	2	2	1	2	0	1	2	1	0	1	0	0	0	0	0		0	0	1	1	1	1
1269	5	5	5	5	3	0	6	3	5	1	1	3	3	3	1	0	6	6	6	3	6	1	1	1	2	1	3	1	2	2	2	2	1	1	2	1	0	1	0	1	0	0	1	1	0	0	0	0	0
1270	1	1	0	5	4	2	5	2	4	0	6	5	1	0	2	0	5	6	6	1	5	0	2	1	1	0	3	1	1	0	1	0	2	0	1	0	0	0	0	0	0	0		0	0	0	0	1	1
1271	1	2	1	6	0	0	6	0	5	0	0	5	2	2	0	0	6	6	6	0	5	0	1	0	0	1	2	1	1	0	1	0	1	0	0	0	0	0	0	0	0	0		0	0	0	0	0	1
1272	5	4	6	3	3	4	3	4	3	4	4	2	4	5	3	5	3	2	3	6	4	3	2	2	0	2	2	2	2	2	1	0		1	1	3	0	1	0	1	0	0		0	1	0	0	1	0
1273	6	5	5	5	0	4	6	6	4	6	5	2	6	6	0	1	2	0	0	6	5	0	3	1	2	1	3	2	2	0	2	0	3	1	1	0	0	0	0	0	0	0		0	0	0	1	1	1
1274	2	2	2	6	2	1	6	1	6	0	1	5	1	2	0	1	6	6	6	1	5	1	1	0	2	0	2	0	1	1	1	0	2	0	1	0	0	0	0	0	0	0		0	0	0	0	1	1
1275	2	2	1	3	3	3	5	1	5	3	3	5	1	1	1	1	5	5	5	1	5		2	0	1	1	1	1	1	1	1	0	1	1	2	1	1	1	0	0	1	0	2	0	1	0	0	1	1
1276	5	5	5	6	6	5	6	5	5	5	0	0	6	6	6	0	5	6	5	5	5	5	3	3	3	2	3	2	2	1	2	1	3	2	2	2	0	1	0	0	1	0	1	1	0	0	0	0	0
1277	1	5	3	6	5	0	6	1	3	0	3	4	1	5	1	2	6	0	1	1	5	1	3	2	3	2	3	2	2	1	2	1	0	0	2	0	0	0	0	0	0	0		0	0	0	0	0	0
1278	5	6	5	6	3	1	6	6	6	1	5	5	3	6	1	0	6	6		6	6	0	1	0	0	0	2	0	1	1	1	0	0	1	1	0	0	0	0	0	0	0		0	0	0	1	0	1
1279	0	1	1	6	1	0	6	0	6	0	0	6	0	0		0	6	6	6	0	6	1	1	0	0	0	0	0	0	0	0	0	0		0		0	0	0	0	0	0		0	0	0	0	0	0
1280	1	0	1	6	0	5	6	1	6	3	6	6	0	6	0	0	6	6	6	1	5	3	2	0	2	0	2	1	1	1	2	1	3	0	1	1	0	0	0	0	0	0		0	0	0	0	0	0
1281	5	6	5	6	5	3	5	5	3	4	5	0	6	6	4	0	6	2	1	6	6	1	3	2	3	2	3	2	3	2	2	0	2	3	1	1	0	0	0	0	0	0		1	1	0	0	1	0
1282	1	3	2	6	1	0	6	1	6	0	1	6	1	3	0	2	6	5	5	1	5	3	1	0	1	0	2	0	1	1	0	0	1	0	0	0	0	0	0	0	0	0		0	0	0	0	0	1
1283	0	0	0	6	1	0	5	0	5	0	0	5	1	0	1	0	6	5	6	0	5	0	2	0	0	0	1	0	1	1	0	0	1	0	0	0	0	0	0	0	0	0		0		0	0	0	1
1284	4	3	1	3	3	2	3	1	3	0	3	1	4	3	3	1	3	2	2	1	0	1	2	2	2	1	2	2	1	2	1	1	0	2	1	1	1	1	0	0	0	0		0	0	1	0	0	0
1285	3	3	3	4	1	1	6	3	5	0	4	2	6	6	1	1	6	6	5	3	5	2	2	2	2	1	3	1	3	3	1	0	2	2	1	3	0	0	0	0	0	0		0	0	0	0	0	1
1286	1	3	1	4	1	1	6	1	2	1	5	5	1	3	0	1	5	1	6	6	3	4	2	1	3	2	2	1	3	2	1	0	3	2	2	3	0	1	0	1	0	0	1	0	0	0	0	0	0
1287	1	3	1	4	1	1	6	1	2	1	5	5	1	3	0	1	5	1	6	6	3	4	2	1	3	2	2	1	3	2	1	0	3	2	2	3	0	1	0	1	0	0	1	0	0	0	0	0	0
1288	3	5	5	6	0	1	6	0	5	0	0	5	0	5	0	1	6	6	6	1	6	0	1	1	1	0	2	1	2	1	0	1	3	0	1	1	0	0	0	0	0	0		0	0	0	0	0	1
1289	0	5	6	6	1	1	6	4	6	0	0	5	1	5	0	3	6	6	6	0	5	1	2	1	2	1	2	1	2	0	0	0	3	0	0	2	0	0	0	0	0	0		0	0	0	0	1	1
1290	0	0	1	1	0	0	6	0	5	0	0	5	0	1	0	0	5	6	6	1	5	0	1	0	0	0	3	0	1	1	1	1	2	0	1	1	0	0	0	0	0	0		0	0	0	0	1	1
1291	1	0	4	6	3	3	4	1	5	4	5	3	4	5	0	1	3	4	6	1	2	3	2	2	1	1	3	2	2	1	2	0	3	0	2	0	1	1	0	0	1	0	2	0	1	1	0	1	1
1292	5	6	4	5	0	3	6	1	6	0	5	4	5	6	1	1	6	6	5	3	5	0	1	1	1	1	2	0	2	1	1	1	3	1	0	1	0	0	0	0	0	0		0	1	0	0	1	1
1293	1	1	1	4	0	3	6	1	6	0	0	6	1	1	0	1	6	6	6	1	5	0	1	0	0	0	1	1	1	1	0	0	3	0	0	0	0	0	0	0	0	0		0	1	0	0	0	0
1294	1	1	3	3	1	1	6	1	5	0	1	5	1	1	0	1	6	5	4	1	4	1	1	1	1	0	2	1	1	1	1	0	2	0	1	0	0	0	0	0	0	0		0	0	0	0	1	1
1295	1	1	0	2	1	0	3	1			0	6	2	1	2	2	6	4	5	0	2	1	1	0	1	0	0	0	1	1	1	0	0	0	0	0	0	0	0	0	0	0		0	0	0	0	1	1
1296	0	1	1	3	3	1	3	0	3	0	0	3	0	1	1	0	5	3	2	1	2	1	1	0	0	0	1	1	1	1	0	0	2	0	0	0	0	0	0	0	0	0		0	0	0	0		1
1297	3	5	5	5	5	5	5	3	5	3	5	2	3	5	4	3	6	5	6	2	4	1	2	1	1	1	2	1	2	1	0	1	1	1	0	1	0	0	0	0	0	0		0	0	0	0	1	1
1298	1	3	4	6	0	0	4	0	2	3	1	5	0	1	2	2	2	3	6	0	6	1	1	0	0	0	1	0	1	0	0	0	2	0	1	0	0	0	0	0	0	0		0	0	0	0	0	1
1299	5	5	5	6	1	3	6	6	6	0						6	6	3	6	6	5	0	3	1	3	1	3	1	3	3	3	1	2	1	3	1	0	1	0	1	1	0	1	1	0	0	0	1	0
1300	4	5	5	6	6	0	6	5	5	0	1	5	6	6	0	0	6	5	6	3	3	6	3	3	0	2	3	1	2	0	2	0	3	2	0	0	0	0	0	0	0	0		0	1	1	0	1	1
1301	3	3	4	6	6	3	6	3	6	3	3	5	5	4	3	2	6	3	5	1	6	0	2	1	2	1	2	1	2	1	0	0	1	0	1	2	1	1	0	0	0	0	1	1	1	0	0	0	1
1302	3	4	4	6	5	4	6	3	6	1	3	5	3	5	4	1	6	5	5	1	4	4	2	1	1	0	3	1	2	1	1	1	2	1	0	1	0	0	0	0	0	0		0	1	0	0	1	1
1303	1	0	0	1	0	0	6	0	6	0	1	6	1	1	0	0	6	6	6	1	5	0	1	0	0	0	1	0	1	1	1	0	1	0	0	0	0	0	0	0	0	0		0	0	0	0	1	1
1304	2	3	2	2	0	6	4	4	4	6	4	5	5	5	5	0	6	6	5	5	6	5	2	1	1	2	1	2	2	1	1	2	0	3	3	0	0	0	0	0	0	0		1	1	0	1	1	1
1305	1	2	3	6	1	1	6	0	4	0	1	5	1	2	1	2	5	5	5	1	5	0	1	0	0	0	1	1	1	1	1	0	1	0	1	0	0	0	0	0	0	0		0	0	0	0	1	1
1306	3	5	1	6	5	0	6	0	6	1	0	6	1	6	3	0	6	6	6		5	3	1	1	0	0	1	1	1	1	0	0	0	1	0	0	0	0	0	0	0	0		0	0	0	0	0	1
1307	3	3	2	5	3	3	5	1	4	3	2	5	2	3	3	2	5	5	5	1	5	5	2	1	1	1	2	1	2	1	0	1	3	0	1	0	0	0	0	0	0	0		0	0	0	0	0	0
1308	3	4	5	5	3	1	5	3	5	0	0	4	1	4	1			5	5	4	1	0	3	0	1	0	2	1	1	1	1	0	2	0	1	0	1	0	0	0	0	0		0	1	0	1	1	0
1309	5	5	5		3	5	5	3	0	6	6	3	5	5	5	5	5	5	0	3	2	1	3	1	3	1	3	2	2	0	2	0	3	1	2	1	0	0	0	0	0	0		0	0	0	0	1	1
1310	5	5	5	5	4	3	3	3	5	0	5	4	6	6	6	0	6	6	6	4	5	0	1	0	3	0	3	2	3	2	2	2	0	2	0	3	0	0	0	0	0	0		0	0	0	0	1	1
1311	1	0	0	6	0	0	6	0	6	0	3	6	1	4	1	0	6	6	6	0	6	0	1	0	0	0	0	0	1	0	0	0	1	0	0	0	0	0	0	0	0	0		0	0	0	0	1	0
1312	1	6	5	6	5	3	6	3	5	5	5	1	3	5	3	3	3	5	1	3	0	6	3	1	2	1	3	1	1	1	1	1	3	1	1	1	0	0	0	0	0	0		0	0	0	1	1	1
1313	1	3	3	6	0	1	6	1	6	0	0	5	1	3	0	0	6	5	3	0	6	0	0	0	0	0	2	1	1	1	0	1	1	0	0	0	0	0	0	0	0	0		0	0	0	0	1	1
1314	3	3	5	6	0	3	6	1	5	3	3	1	3	5	3	2	5	5	2	1	3	0	2	1	0	1	1	1	2	1	1	0	1	0	0	1	0	1	0	1	0	1	1	1	0	0	0	1	1
1315	6	6	6	6	6	6	3	6	1	3	0	1	5	6	0	0	5	5	3	6	4	1	3	2	2	2	3	2	2	3	2	0	1	1	2	1	0	1	1	0	1	0	1	0	0	0	0	1	1
1316	3	6	3	6	4	0	6	2	5	1	0	5	0	5	3	0	5	5	6	2	3	0	2	3	2	1	2	2	2	1		1	3	1	1	1	0	1	0	1	0	0	1	0	0	0	0	0	0
1317	1	0	1	6	1	0	6	1	6	0	0	5	1	0	2	1	6	6	5	1	6	0	1	0	0	0	0	0	1	1	0	0	2	0	0	0	0	0	0	0	0	0		0	0	0	0	0	1
1318	5	5	1	6	1	0	6	0	6	0	0	6	0	0	0	1	6	5	5	1	5	0	3	0	0	0	2	0	1	1	1	0	3	0	1	0	0	0	0	0	0	0		0	0	0	0	1	1
1319	0	2	3	6	0	1	6	0	5	0	6	5	2	0	0	2	6	5	4	1	6	5	1	0	1	1	2	0	1	1	1	0	2	0	1	0	0	0	0	0	0	0		0	0	0	0	1	1
1320	4	5	3	4	2	4	6	0	6	0	0	5	1	6	0	0	6	6	6	1	6	0	1	2	2	1	2	1	2	1	0	0	1	2	0	1	0	1	1	1	0	0	1	0	1	1	1	0	0
1321	1	3	3	6	1	1	6	1	6	1	2	3	3	3	1	1	3	3	3	1	3	1	1	1	2	1	3	2	2	0	1	1	1	1	1	1	0	0	0	0	0	0		0	1	0	0	0	1
1322	0	1	1	6	0	0	6	0	5	0	1	6	0	2	3	1	6	6	6	0	5	0	0	0	0	0	0	0	1	0	1	0	0	0	0	0	0	0	0	0	0	0		0	0	0	0	0	1
1323	1	1	1	6	1	1	6	1	6	0	1	6	0	1	0	1	6	6	6	0	5	1	1	0	2	0	1	0	1	1	0	0	0	0	0	0	0	0	0	0	0	0		0	0	0	0	1	1
1324	0	1	0	6	1	0	0	0	4	0	0	6	0	0	0	1	6	6	5	0	6	3	1	0	0	0	1	0	0	1	0	0	0	0	0	0	0	0	0	0	0	0		0	0	0	0	0	1
1325	3	5	5	6	3	4	5	5	5	3	1	4	5	5	1	5	5	6	6	5	2	2	2	1	2	1	3	2	2	2	1	1	1	3	2	1	0	0	0	0	0	0		1	0	0	1	0	1
1326	1	1	1	3	0	0	6	1	5	0	0	5	4	1	0	0	6	6	6	1	6	0	1	0	0	0	1	0	0	0	0	0	0	0	1		0	0	0	0	0	0		0	1	0	0	1	1
1327	3	3	1	1	1	3	5	1	3	1	3	5	3	5	3	5	5	3	3	1	3	3	2	1	1	2	1	1	2	1	2	0	3	2	2	0	0	0	0	0	0	0		0	1	0	0	0	1
1328	0	1	0	1	0	0	6	0	6	0	0	6	0	0	0	0	6	5	3	0	6	0	1	0	0	0	0	0	1	1	0	0	1	0	0	0	0	0	0	0	0	0		0	0	0	0	1	1
1329	3	2	5	4	1	3	6	0	5	1	1	2	2	0	0	1	5	5	4	1	6	3	1	0	0	0	1	0	1	1	1	0	0	1	1	0	0	0	0	0	0	0		0	0	0	0	0	1
1330	5	5	4	4	5	4	4	2	4	5	5	2	5	1	3	2	3	3	3	6	2	0	3	3	3	2	3	2	2	2	2	1	1	2	1	1	1	1	1	0	1	0	2	0	0	0	0	1	1
1331	6	6	6	6	6	5	4	6	1	0	0	1	5	1	1	5	6	5	2	6	0	0	3	0	3	2	3	2	2	3	3	1	3	2	2	0	0	0	0	0	0	0		0	0	0	1	1	1
1332	1	1	1		1	1		0	1		1		1	1	1	1	3	3	3	0	3	1	1	0	0	0	1	1	1	1	1	0	1	0	0	0	0	0	0	0	0	0		0	0	0	0	0	0
1333	5	6	5	6	6	5	6	1	6	1	1	3	2	6	2	4	6	6	6	5	4	1	3	0	0	2	1	0	2	0	0	0	0	0	0	0	1	1	0	0	0	1	2	0	0	1	0	0	1
1334	1	1	1	1	1	3	3	0	2	1	1	0	2	3	1	3	4	3	2	0	1	0	2	1	1	1	2	1	2	1	1	1	1	1	1	0	0	0	0	0	0	0		1	0	0	0	0	1
1335	1	4	2	3	2	0	4	1	1	2	2	4	4	6	2	0	5	5	3	1	3	0	1	1	0	1	2	1	2	1	0	0	2	1	0	1	0	0	0	0	0	0		0	0	1	0	1	1
1336	1	3	4	6	1	0	6	3	6	0	0	5	3	5	0	2	6	5	6	1	6	1	2	0	2	1	2	0	3	1	2	0	3	0	1	0	0	0	0	0	0	0		0	1	0	1	1	1
1337	6	6	6	6	1						3	0	5	5	0	5	6	5	5	5	5	5	3	3	3	2	3	2	1	1	2	1	1	2	2	1	1	1	0	0	1	0	2	0	0	0	0	0	1
1338	1	1	1	1	0	0	6	0	5	0	0	6	1	5	1	1		6	6	0	6	0	0	0	0	0	0	0	1	0	0	0	0	0	0	1	0	0	0	0	0	0		0	0	0	0	1	1
1339	1	3	3	3	1	0	6	1	6	0	0	6	1	1	0	1	6	6	6	1	6	0	1	0	0	0	2	0	0	1	0	0	0	0	0	0	0	0	0	0	0	0		0	0	0	0	0	1
[truncated: 17 more columns]

## Sheet: Feuil1
CONTRACT
1
1
1
1
1
1
1
1
1
1
1
1
1
1
2
1
1
1
1
1
1
1
1
1
1
1
1
1
1
1
1
1
1
1
1
1
1
1
2
1
1
1
1
1
1
1
1
1
1
1
1
1
1
1
1
1
1
2
1
1
1
1
1
1
1
1
1
1
1
1
1
1
1
1
1
1
1
1
1
1
1
1
1
1
1
1
1
1
1
1
1
1
1
1
1
1
1
1
1
1
1
1
1
1
1
1
1
1
1
1
1
1
1
1
1
1
1
1
2
1
1
1
1
1
1
1
2
2
1
2
1
1
1
1
1
2
1
1
1
1
1
1
1
1
1
1
1
1
1
1
1
1
1
1
2
1
1
1
1
1
1
1
1
1
1
1
1
1
1
1
1
1
1
1
1
1
1
1
2
1
1
1
1
1
1
2
1
1
1
1
1
1
1
1
1
1
1
1
1
1
1
1
1
1
1
1
2
1
1
2
1
1
1
1
1
1
1
1
1
1
1
1
1
1
1
1
1
1
1
1
1
1
1
1
1
1
1
1
1
1
1
2
1
1
1
1
1
2
1
1
2
1
1
1
1
1
1
1
2
1
1
1
1
1
1
2
1
1
1
1
1
2
1
1
1
1
1
1
1
1
1
1
1
1
1
1
1
1
1
1
1
1
1
1
1
1
1
1
1
1
1
1
1
1
2
1
1
1
1
1
1
2
1
1
1
1
1
1
1
1
1
1
1
2
1
1
1
1
1
1
1
1
1
1
1
1
1
2
1
1
1
1
1
1
1
1
1
1
1
1
1
1
1
1
1
1
1
1
1
1
1
1
1
1
1
1
1
1
1
1
1
1
1
1
1
1
2
1
1
1
1
1
1
1
1
1
1
2
1
1
1
1
1
2
1
1
1
1
1
1
1
1
1
1
1
1
1
1
1
1
1
2
1
1
1
1
1
1
1
2
1
1
1
1
2
1
1
1
1
1
1
1
1
1
1
1
1
1
1
1
1
1
1
1
1
1
1
2
1
1
1
1
1
1
1
1
1
1
1
1
1
1
1
1
1
1
1
1
1
1
1
1
1
1
1
2
1
1
1
1
1
1
1
1
1
1
1
1
1
1
1
1
1
1
1
1
2
1
1
1
1
1
1
1
1
1
1
1
1
1
1
1
1
1
1
1
1
1
2
1
1
1
1
1
1
2
1
1
1
1
1
1
1
1
1
1
1
1
2
1
1
1
1
1
1
1
1
1
2
1
1
1
2
1
1
1
1
1
1
1
1
1
1
1
1
1
1
1
1
1
1
1
1
1
1
1
1
1
1
1
1
1
2
1
1
1
1
1
1
2
1
1
1
1
1
1
1
1
1
1
1
1
1
1
1
1
1
1
1
1
1
1
1
1
1
1
1
2
1
1
1
1
1
1
1
1
1
1
1
1
1
1
1
1
1
1
1
1
1
1
1
1
1
1
1
1
1
1
1
1
1
1
1
1
1
1
1
1
2
1
1
1
2
1
1
1
1
1
1
1
1
1
1
1
1
1
1
1
1
1
1
1
1
1
1
1
1
1
1
1
1
1
1
1
1
1
1
1
1
1
1
1
1
1
1
1
1
1
1
1
1
1
1
1
2
1
1
1
1
1
1
1
1
1
1
1
1
1
1
1
1
1
1
1
1
1
1
1
1
1
1
1
1
1
1
1
2
1
1
1
1
1
1
1
1
1
1
1
1
1
1
1
1
1
1
1
1
1
1
1
1
1
1
1
1
1
1
1
1
1
1
1
1
1
1
1
1
1
1
1
1
1
1
1
1
1
1
1
1
1
1
1
1
1
1
1
1
1
1
1
1
1
1
1
1
1
1
1
1
2
1
2
1
1
1
1
1
1
1
1
1
1
1
1
1
1
1
1
1
1
1
1
1
1
1
1
1
1
1
1
1
1
1
1
1
1
1
1
1
1
1
1
1
1
1
1
1
1
1
1
1
1
1
2
1
1
1
1
1
1
1
1
1
1
1
1
1
1
1
1
1
1
1
1
1
1
1
1
1
1
1
1
1
1
1
1
1
1
1
1
1
1
1
1
1
1
1
1
1
1
1
1
1
1
1
1
1
1
1
1
1
1
1
1
1
1
1
1
1
1
1
1
1
1
1
1
1
1
1
1
1
2
1
1
1
1
1
1
1
1
1
1
1
1
1
1
1
1
1
1
1
1
1
1
1
1
1
1
1
1
2
1
1
1
1
1
1
1
1
1
1
1
1
1
1
1
1
1
1
1
1
1
1
1
1
1
1
1
1
2
1
1
1
1
1
1
1
1
1
1
1
1
1
1
1
1
1
1
1
1
1
1
1
1
1
1
1
1
1
1
1
1
1
1
1
1
1
1
1
1
1
1
1
1
1
1
1
1
1
1
1
1
2
1
1
1
1
1
1
1
1
1
1
1
1
1
1
1
1
1
1
1
1
1
1
1
1
1
1
1
1
1
1
1
1
1
1
1
1
1
1
1
1
1
1
1
1
1
1
1
1
1
1
1
1
1
1
1
1
1
1
1
1
1
1
1
1
1
1
1
1
1
1
1
1
1
1
1
1
1
1
1
1
1
1
1
1
1
1
1
1
1
1
1
1
1
1
1
1
2
1
2
1
1
1
2
1
1
1
1
1
1
1
1
1
1
1
1
1
1
1
1
1
1
1
1
1
1
1
1
1
1
1
1
1
1
1
1
1
1
1
1
1
1
1
2
2
2
1
1
1
1
1
1
1
1
1
1
1
1
1
1
1
1
1
1
1
1
1
1
1
1
1
1
1
1
1
1
1
1
1
1
1
1
1
1
1
1
1
1
1
1
1
1
1
1
1
1
1
1
1
1
1
1
1
1
1
1
1
1
1
1
1
1
1
2
1
1
1
1
1
1
1
1
2
1
1
1
1
1
1
1
1
1
1
1
2
1
1
1
1
1
1
1
1
1
1
1
1
2
1
1
1
1
1
1
